# Supplementary material for: DFT insights into superelectrophilic activation of α,β-unsaturated nitriles and ketones in superacids
Source: Royal Society of Chemistry journal article supplement (doi:10.1039/d2ob01141g), 2022-01-01
Supplement: d2ob01141g1.pdf [file d2ob01141g1.pdf]

## DFT insights into superelectrophilic activation of $\alpha,\beta$ -unsaturated nitriles and ketones in superacids

Alexander M. Genaev,<sup>a</sup> George E. Salnikov<sup>a</sup> and Konstantin Yu. Koltunov<sup>\*b</sup>

<sup>a</sup> Vorozhtsov Novosibirsk Institute of Organic Chemistry, Pr. Lavrentieva 9, Novosibirsk, 630090, Russia.

<sup>b</sup> Boreskov Institute of Catalysis, Pr. Lavrentieva 5, Novosibirsk, 630090, Russia.

\*E-mail: koltunov@catalysis.ru.

### Content

|                                                                                                                                                     | Page |
|-----------------------------------------------------------------------------------------------------------------------------------------------------|------|
| <sup>1</sup> H NMR spectrum (400 MHz) of mesityl oxide <b>55</b> in CDCl <sub>3</sub> at 23 °C .....                                                | 3    |
| NMR spectra of mesityl oxide <b>55</b> in FSO <sub>3</sub> H-SbF <sub>5</sub> /SO <sub>2</sub> ClF/CD <sub>2</sub> Cl <sub>2</sub> at -91 °C .....  | 4    |
| Signal assignments .....                                                                                                                            | 4    |
| <sup>1</sup> H NMR spectrum (600 MHz) .....                                                                                                         | 5    |
| <sup>13</sup> C{ <sup>1</sup> H} NMR spectrum (151 MHz) .....                                                                                       | 6    |
| <sup>1</sup> H (600 MHz) and <sup>13</sup> C (151 MHz) NMR spectra of mesityl oxide <b>55</b> in FSO <sub>3</sub> H-SbF <sub>5</sub> at -1 °C ..... | 7    |
| NMR spectra of mesityl oxide <b>55</b> in FSO <sub>3</sub> H-SbF <sub>5</sub> after destruction .....                                               | 8    |
| Signal assignments .....                                                                                                                            | 8    |
| <sup>1</sup> H NMR spectrum (600 MHz) .....                                                                                                         | 11   |
| <sup>13</sup> C{ <sup>1</sup> H} NMR spectrum (151 MHz) .....                                                                                       | 14   |
| Temperature dependence of $\delta(\text{C4})-\delta(\text{C3})$ of ketone <b>55</b> in superacids .....                                             | 16   |
| Kinetics data .....                                                                                                                                 | 17   |
| Quantum chemical calculations by DFT/PBE/Λ01 .....                                                                                                  | 18   |
| Benzene C <sub>6</sub> H <sub>6</sub> .....                                                                                                         | 18   |
| Cation <b>15</b> .....                                                                                                                              | 18   |
| Cation <b>17</b> .....                                                                                                                              | 18   |
| Dication <b>18</b> .....                                                                                                                            | 19   |
| Dication <b>23</b> .....                                                                                                                            | 19   |
| Structure <b>19</b> .....                                                                                                                           | 19   |
| Pre-reaction complex, TS and product of the reaction <b>17</b> +C <sub>6</sub> H <sub>6</sub> → <b>27</b> .....                                     | 20   |
| Pre-reaction complex, TS and product of the reaction <b>18</b> +C <sub>6</sub> H <sub>6</sub> → <b>28</b> .....                                     | 21   |
| Pre-reaction complex, TS and product of the reaction <b>19</b> +C <sub>6</sub> H <sub>6</sub> → <b>29</b> .....                                     | 23   |
| Structures <b>25</b> and <b>15</b> +C <sub>6</sub> H <sub>6</sub> .....                                                                             | 24   |
| Structures <b>26</b> and <b>16</b> +C <sub>6</sub> H <sub>6</sub> .....                                                                             | 25   |
| Structures <b>30</b> and <b>20</b> +C <sub>6</sub> H <sub>6</sub> .....                                                                             | 26   |
| Structures <b>31</b> and <b>21</b> +C <sub>6</sub> H <sub>6</sub> .....                                                                             | 27   |
| Structures <b>32</b> and <b>22</b> +C <sub>6</sub> H <sub>6</sub> .....                                                                             | 28   |
| Structures <b>34</b> , TS <b>34</b> → <b>33</b> and <b>33</b> .....                                                                                 | 30   |
| Structures <b>35</b> and <b>24</b> +C <sub>6</sub> H <sub>6</sub> .....                                                                             | 31   |
| Cation <b>38</b> .....                                                                                                                              | 32   |
| Dication <b>5a</b> .....                                                                                                                            | 33   |

|                                                                                                                                       |    |
|---------------------------------------------------------------------------------------------------------------------------------------|----|
| Structure <b>39</b> .....                                                                                                             | 33 |
| Pre-reaction complex, TS and product of the reaction <b>38</b> + C <sub>6</sub> H <sub>6</sub> → <b>49</b> .....                      | 34 |
| Pre-reaction complex, TS and product of the reaction <b>5a</b> + C <sub>6</sub> H <sub>6</sub> → <b>50</b> .....                      | 35 |
| Pre-reaction complex, TS and product of the reaction <b>39</b> + C <sub>6</sub> H <sub>6</sub> → <b>51</b> .....                      | 37 |
| Structures <b>46</b> and <b>36</b> +C <sub>6</sub> H <sub>6</sub> .....                                                               | 39 |
| Structures <b>47</b> and <b>37</b> +C <sub>6</sub> H <sub>6</sub> .....                                                               | 40 |
| Structures <b>48</b> and <b>14</b> +C <sub>6</sub> H <sub>6</sub> .....                                                               | 41 |
| Structure <b>40</b> and benzene loss product .....                                                                                    | 42 |
| Structure <b>41</b> and benzene loss product .....                                                                                    | 43 |
| Structure <b>42</b> and benzene loss product .....                                                                                    | 44 |
| Pre-reaction complex, TS and product of the reaction <b>43</b> + C <sub>6</sub> H <sub>6</sub> → .....                                | 46 |
| Dication <b>43</b> .....                                                                                                              | 47 |
| Structure <b>44</b> and benzene loss product .....                                                                                    | 48 |
| Structure <b>45</b> and benzene loss product .....                                                                                    | 49 |
| Structure <b>16</b> .....                                                                                                             | 50 |
| Structure <b>37</b> .....                                                                                                             | 50 |
| Complete basis set (CBS) extrapolation of PBE/Λ0n family for the reaction <b>18</b> + C <sub>6</sub> H <sub>6</sub> → <b>28</b> ..... | 53 |
| M06/6-311+G(2d,2p)/SMD(benzene)//PBE/Λ01 energies.....                                                                                | 54 |

$^1\text{H}$  NMR spectrum (400 MHz) of mesityl oxide **55** in  $\text{CDCl}_3$  at 23 °C

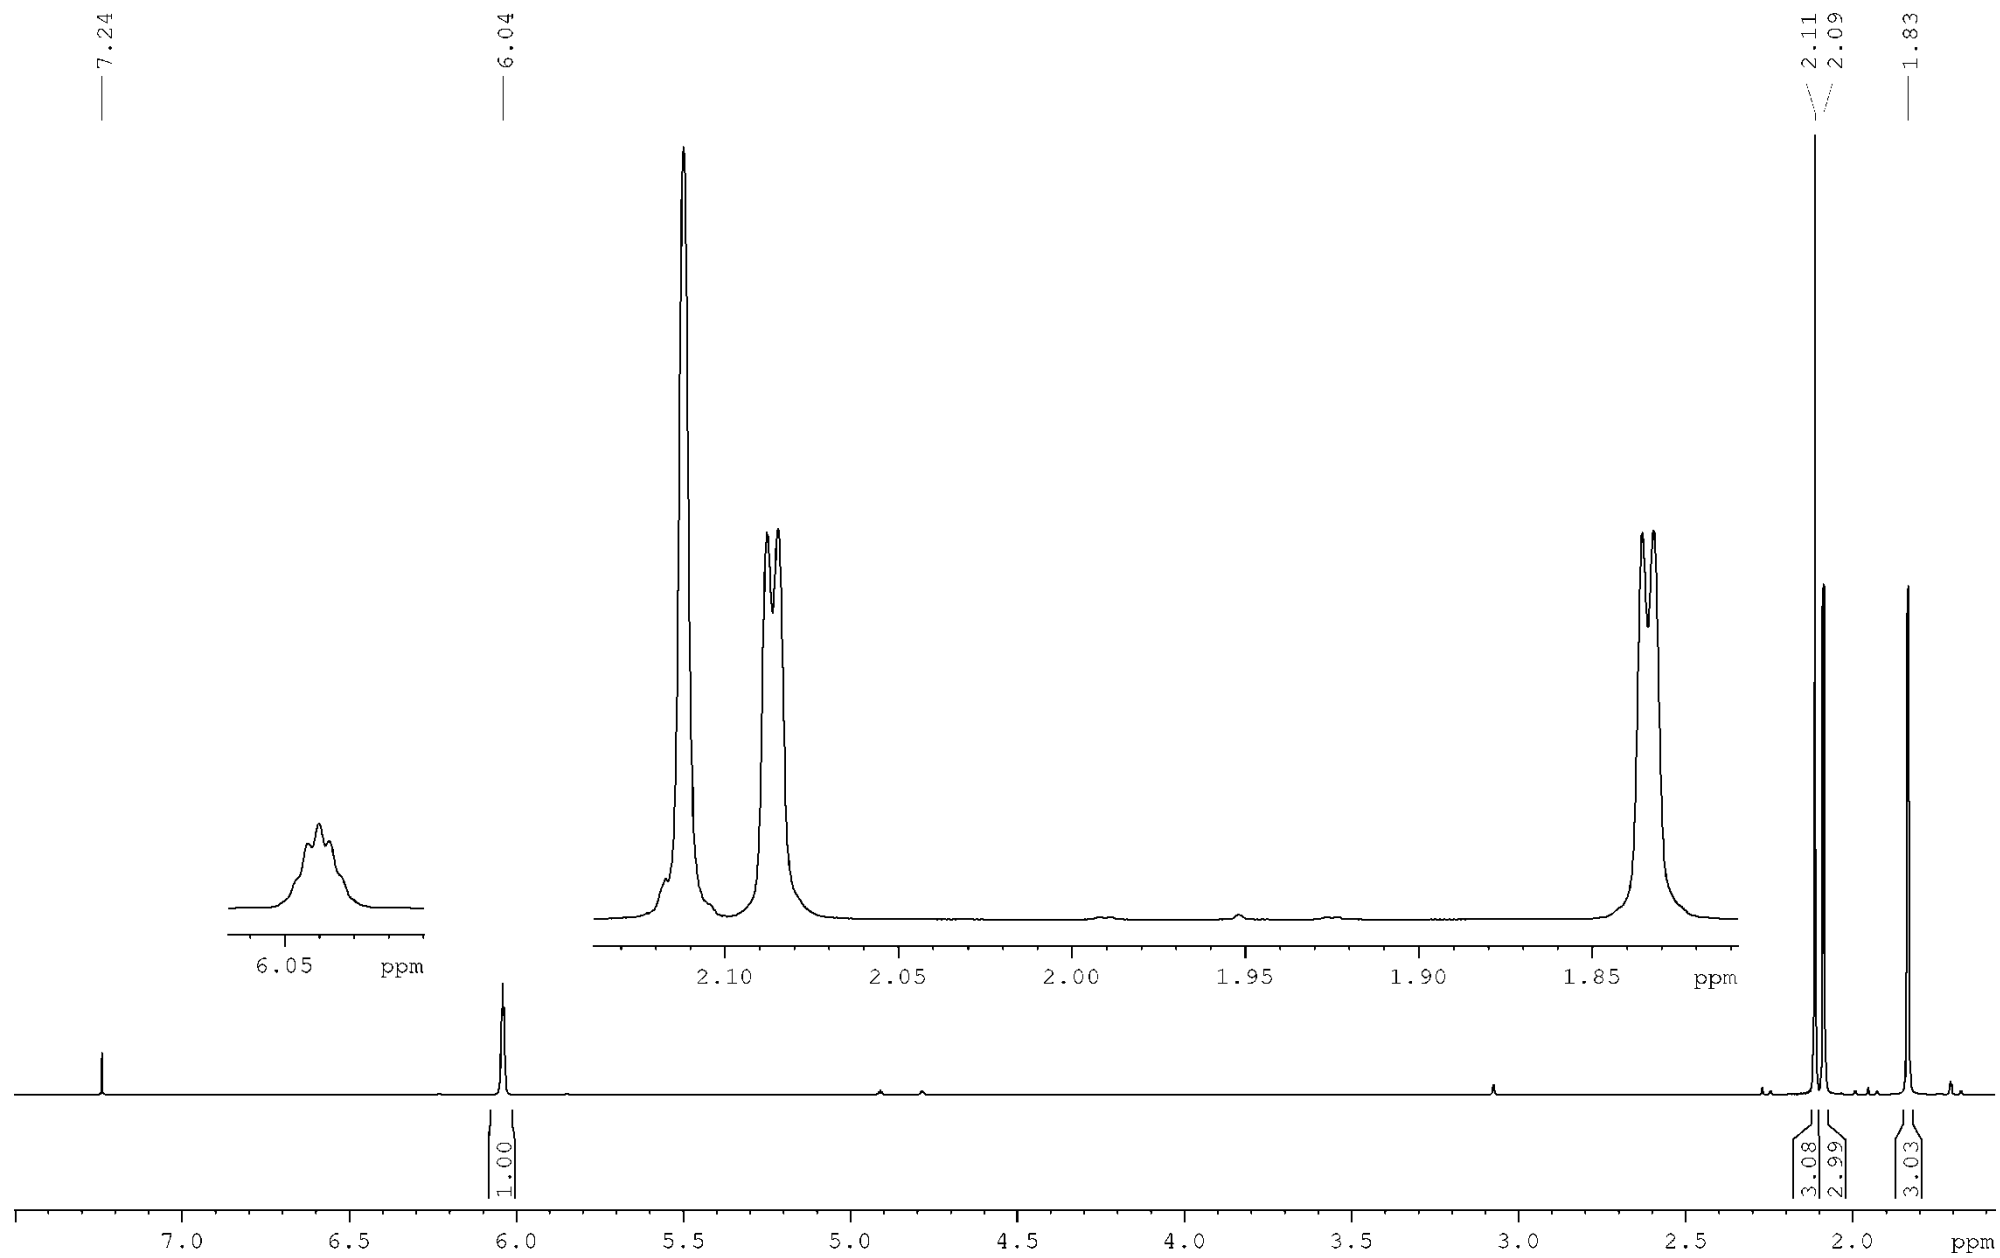

NMR spectra of mesityl oxide **55** in FSO<sub>3</sub>H-SbF<sub>5</sub>/SO<sub>2</sub>ClF/CD<sub>2</sub>Cl<sub>2</sub> at -91 °C  
Pages S4-S6

9.8 mg of compound **55** in 0.1 ml CD<sub>2</sub>Cl<sub>2</sub> + 410 mg FSO<sub>3</sub>H-SbF<sub>5</sub> (1:1, mol/mol) + 0.3 ml SO<sub>2</sub>ClF

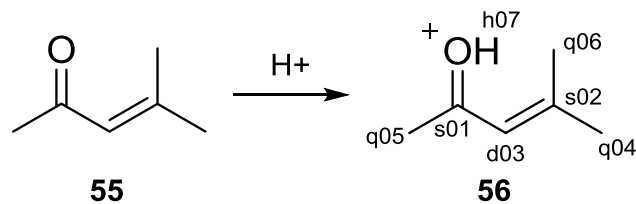

### Signal assignments

Experiment Bruker\_1, 1D 13C: 6 peaks

s01 209.8  
s02 206.4  
d03 121.8  
q04 33.2  
q05 28.3  
q06 27.7

Experiment Bruker\_2, 1D 1H: 6 peaks

d03-H 6.81; <sup>1</sup>J<sub>CH</sub> 167.2 Hz  
q04-H 2.55  
q05-H 2.76  
q06-H 2.67  
h07-H 11.26  
Acid-H 11.78

Experiment Bruker\_3, 2D 13C-1H via onebond (HSQC): 4 peaks

d03-H - d03  
q04-H - q04  
q05-H - q05  
q06-H - q06

Experiment Bruker\_5, 2D 13C-1H via Jcoupling (HMBC): 15 peaks

d03-H - q04 q06 s01  
h07-H - d03 q05 s01  
q04-H - d03 q06 s02  
q05-H - d03 s01 s02(weak)  
q06-H - d03 q04 s02

Experiment Bruker\_6, 2D 1H-1H via through-space (NOESY): 10 peaks

d03-H - Acid-H? q04-H q05-H  
h07-H - Acid-H? q05-H  
q04-H - d03-H  
q05-H - d03-H h07-H  
q06-H - Acid-H? h07-H?

*<sup>1</sup>H NMR spectrum (600 MHz)*

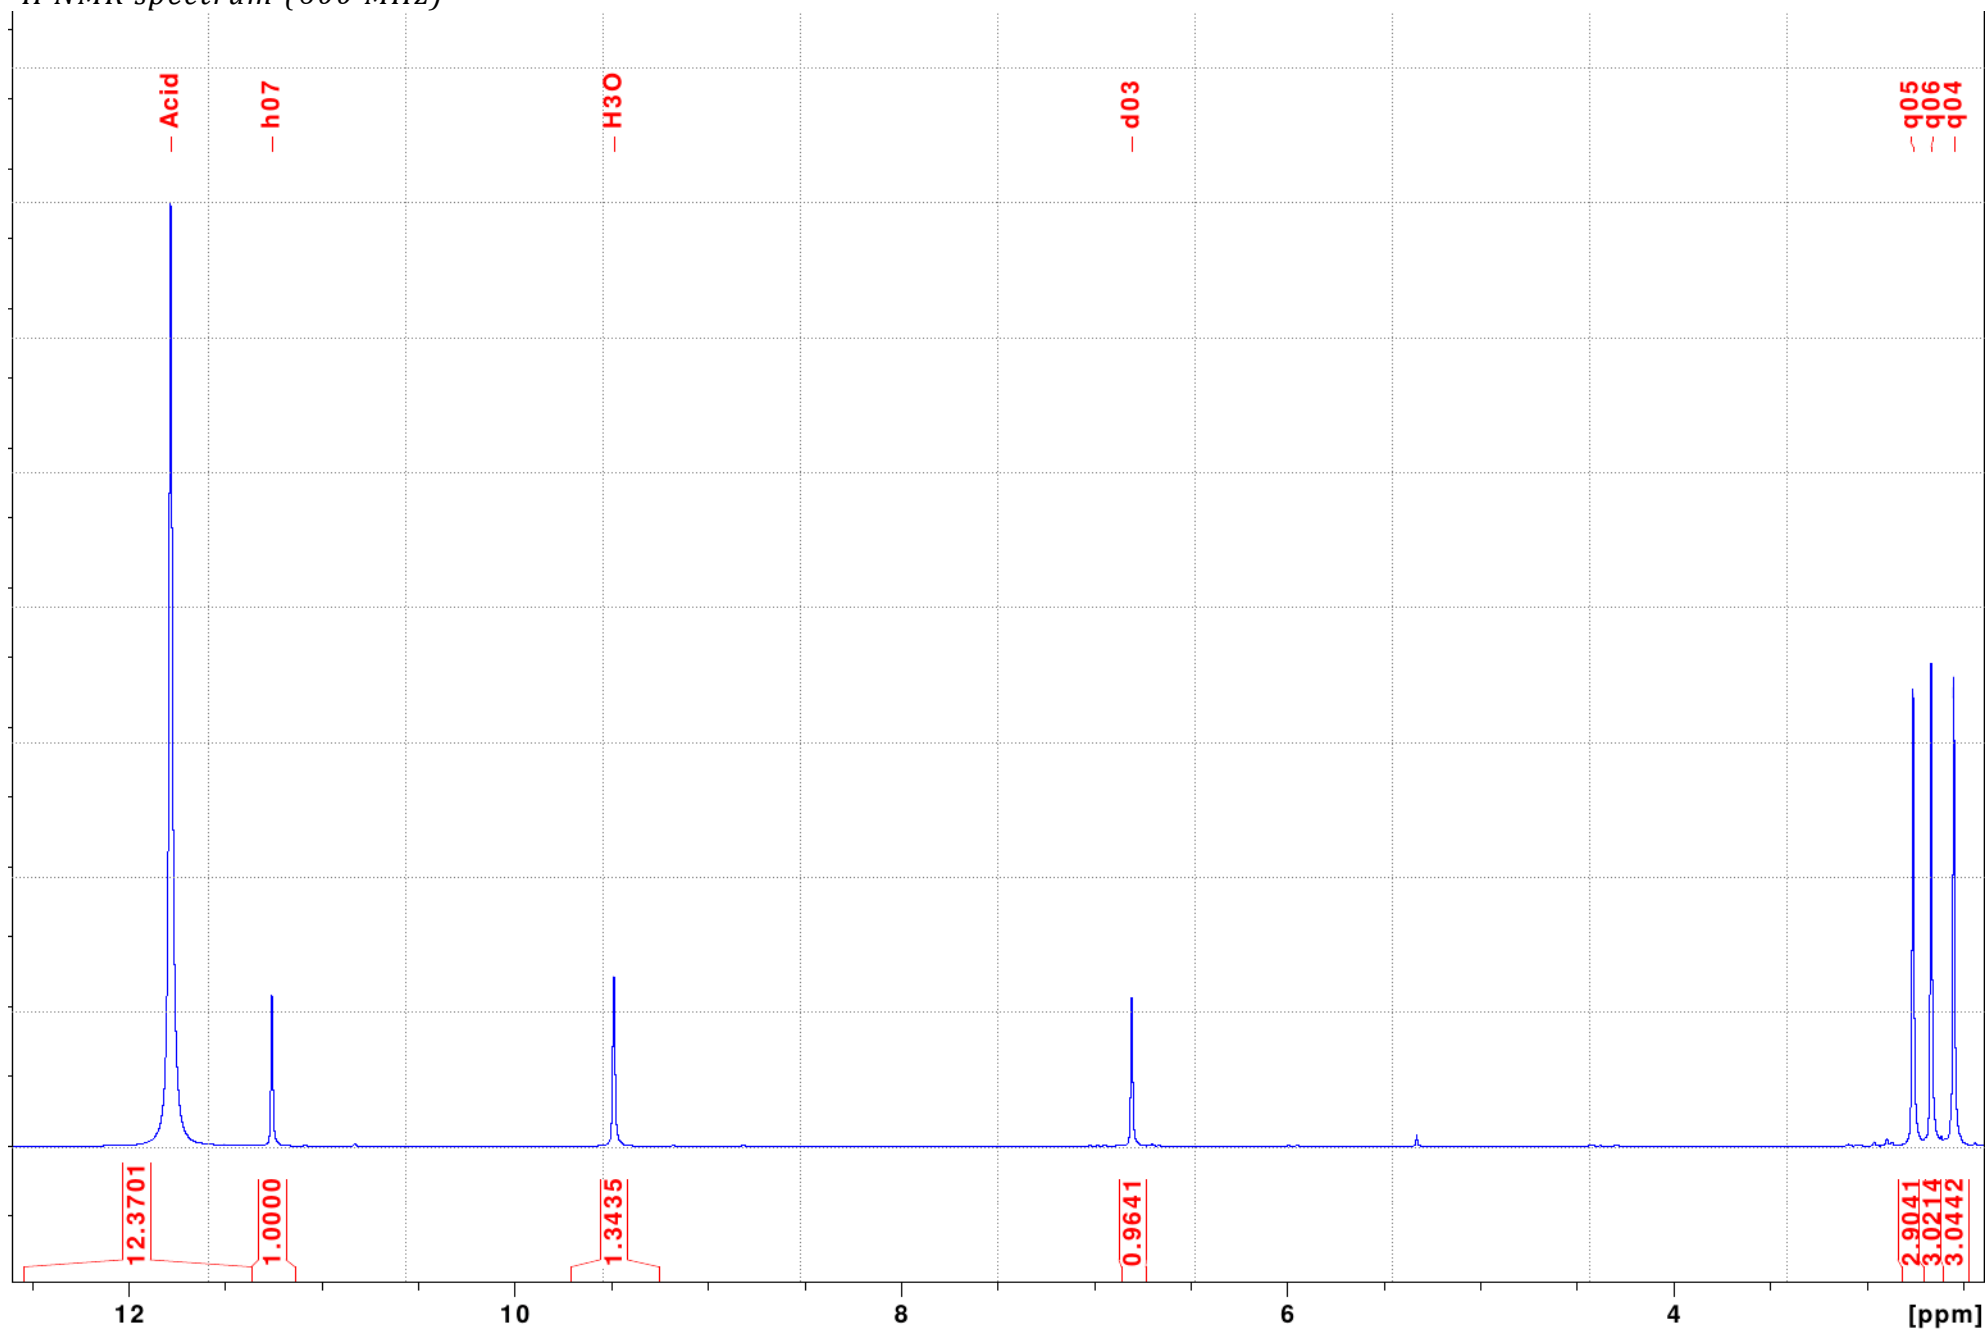

$^{13}\text{C}\{^1\text{H}\}$  NMR spectrum (151 MHz)

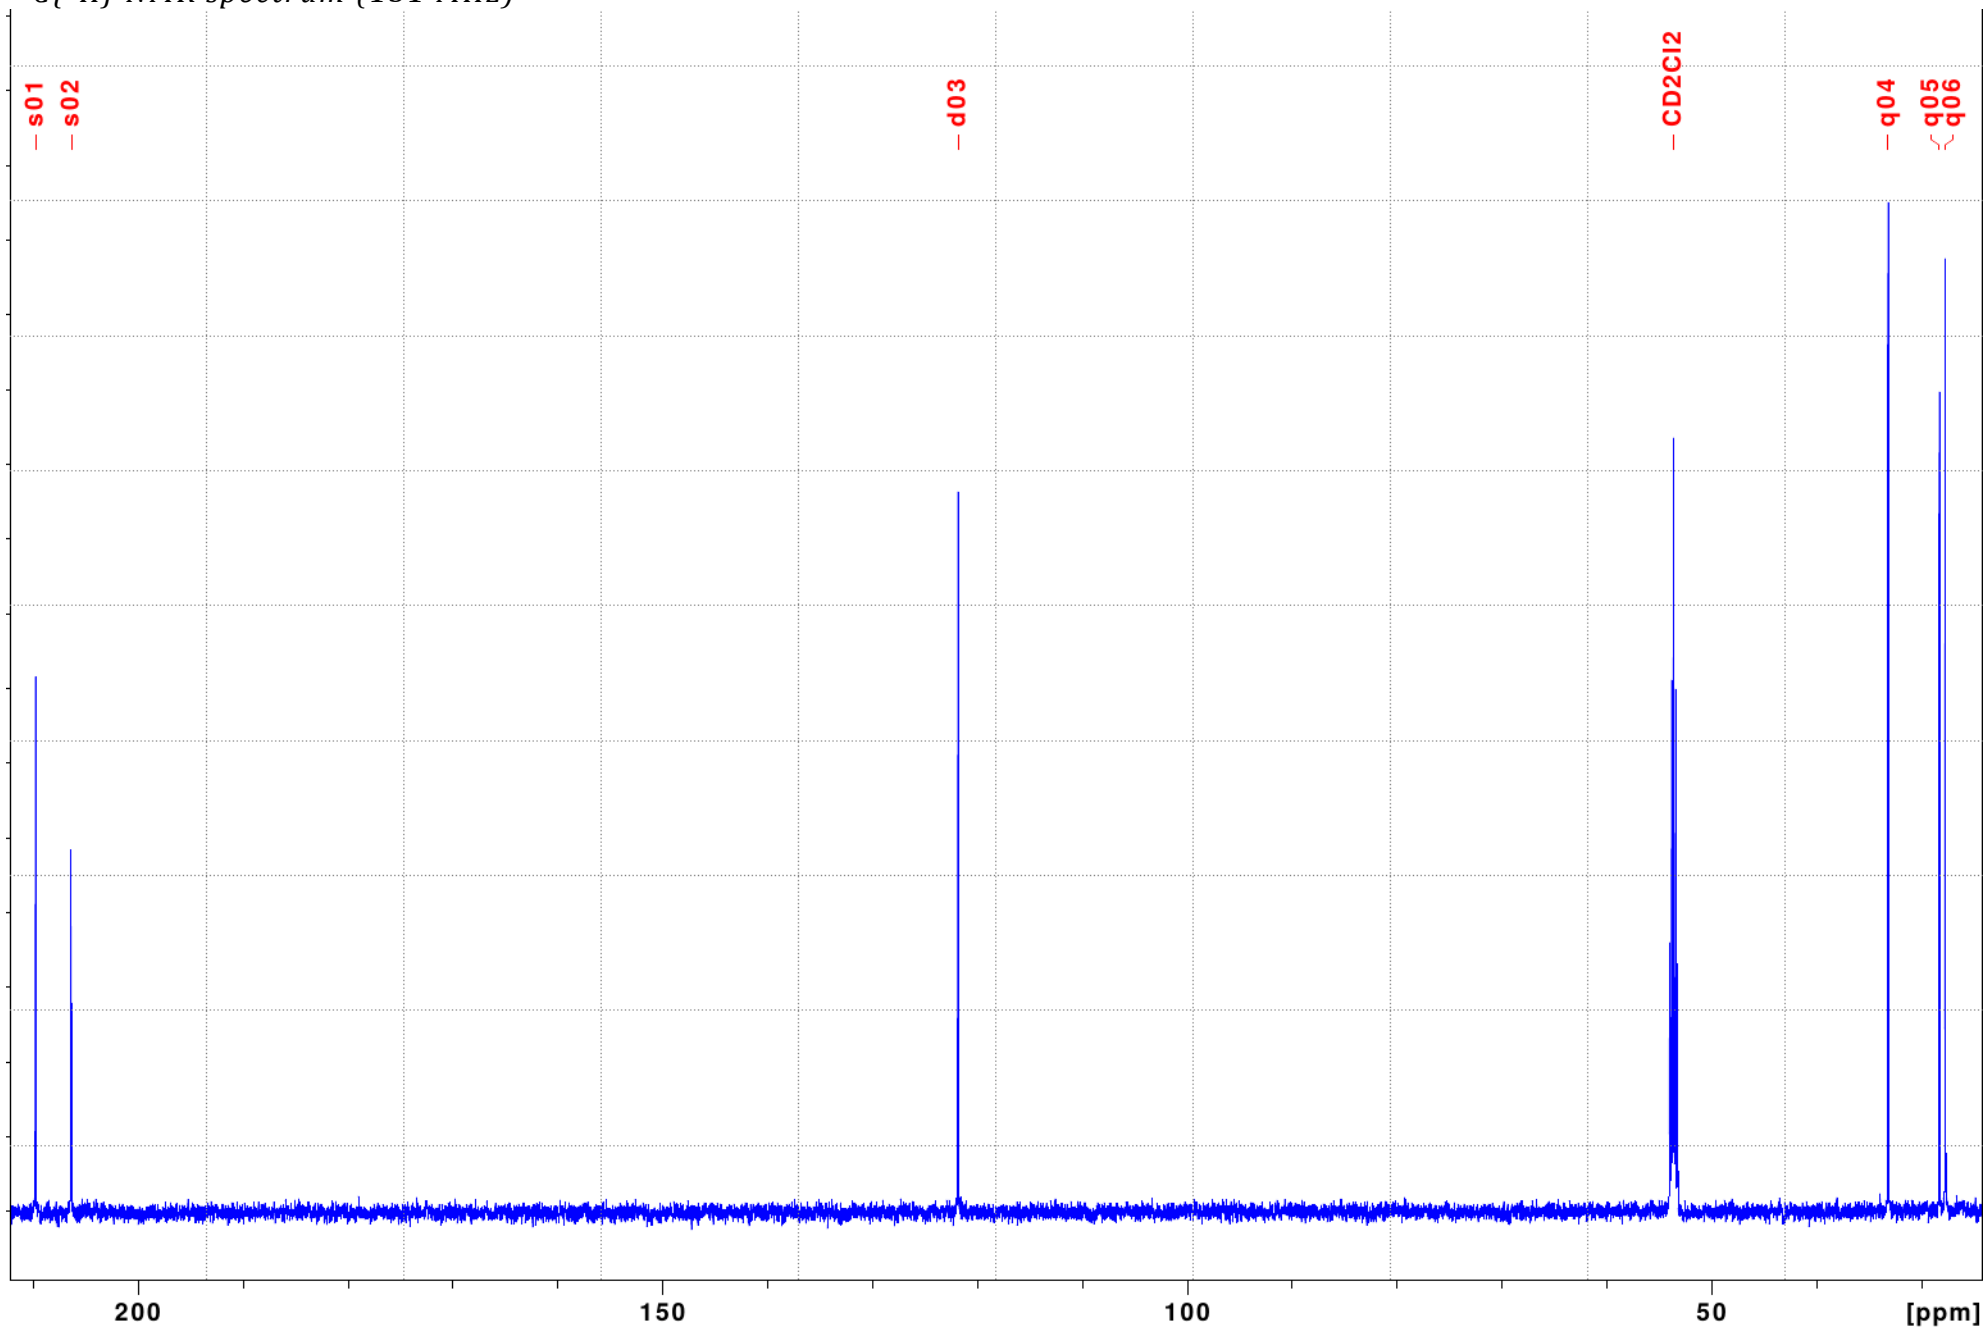

$^1\text{H}$  (600 MHz) and  $^{13}\text{C}$  (151 MHz) NMR spectra of mesityl oxide **55** in  $\text{FSO}_3\text{H-SbF}_5$  at  $-1^\circ\text{C}$   
11.4 mg mesityl oxide + 1 mg  $\text{Me}_4\text{N}^+\text{BF}_4^-$  in  $\text{FSO}_3\text{H-SbF}_5$  (1:1, mol/mol, 0.5 ml)

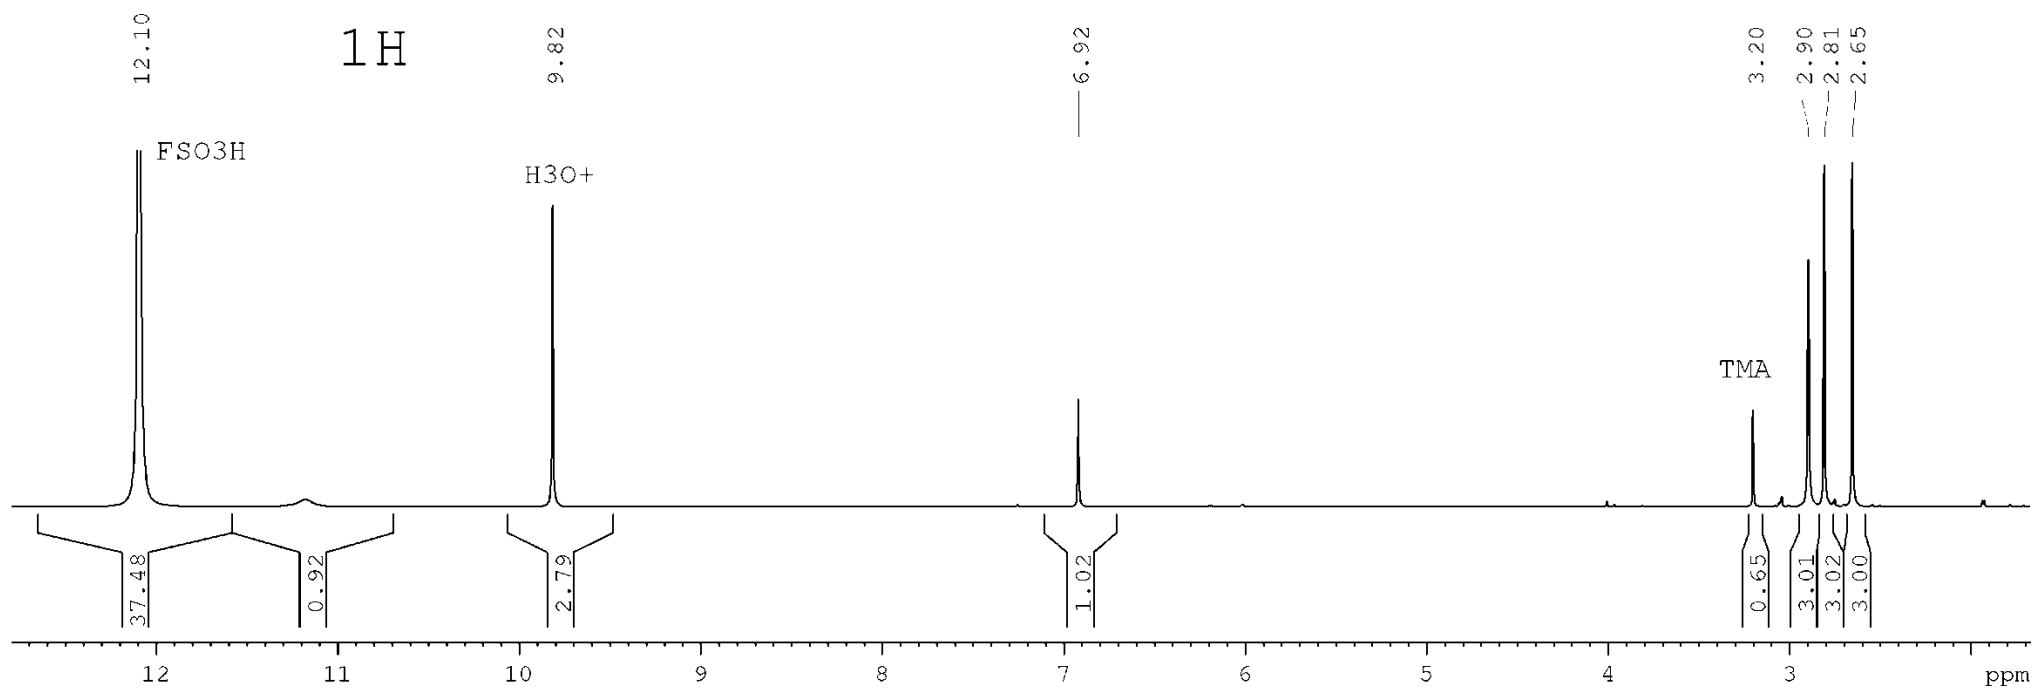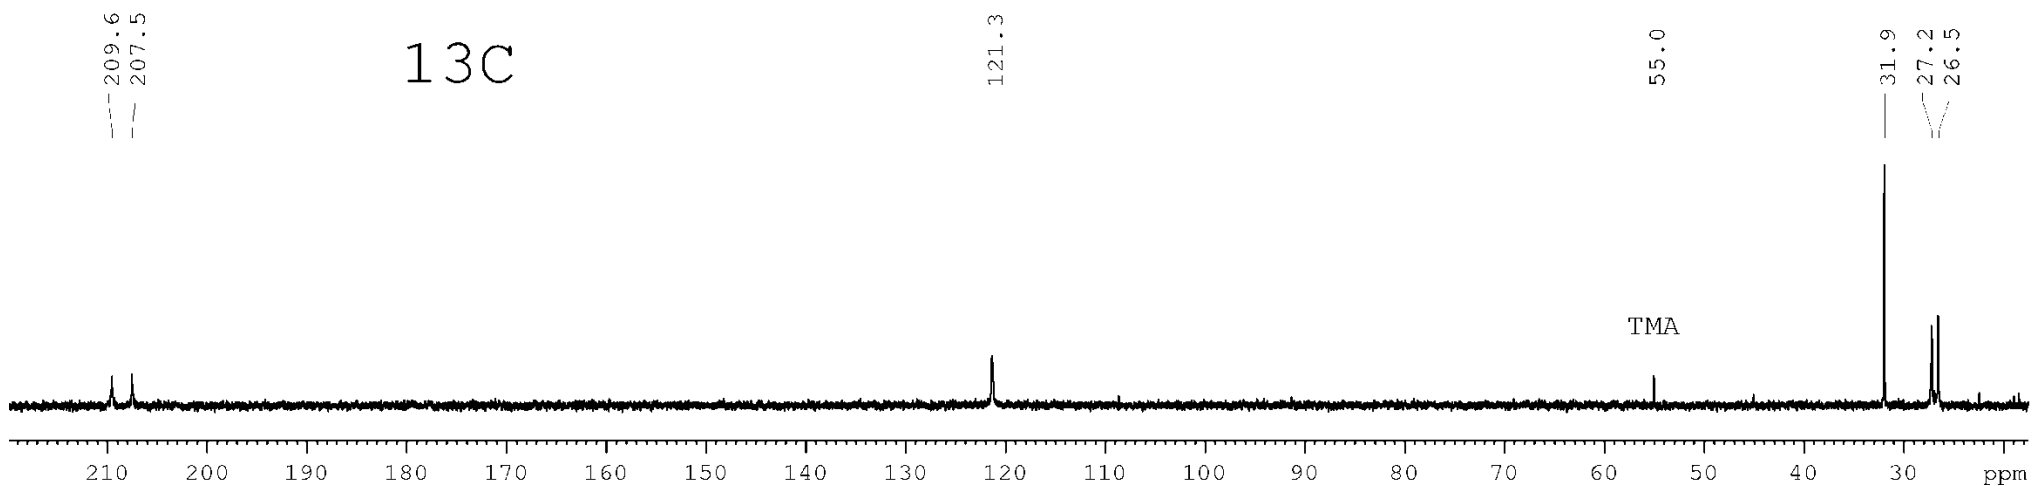

NMR spectra of mesityl oxide **55** in FSO<sub>3</sub>H-SbF<sub>5</sub> after destruction (isomerization, dehydrogenation and cracking)  
Pages S8-S15

Reaction mixture from previous page was heated to 53 °C. NMR spectra were then recorded at 30 °C.

### Signal assignments

#### Molecule A (isomerization product)

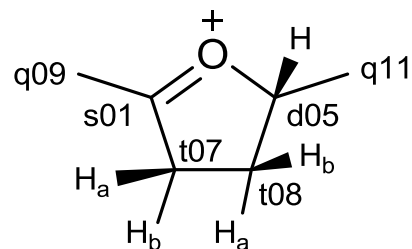

Experiment Bruker\_28, 1D 13C: 6 peaks

s01 240.7  
d05 108.8  
t07 45.0  
t08 26.8  
q09 22.3  
q11 18.3

Experiment Bruker\_26, 1D 1H: 7 peaks

d05-H 6.19 (ddq 8.5, 7.4, 6.5 Hz)  
t07-a 3.79 (ddd 23.2, 10.1, 8.6 Hz)  
t07-b 3.93 (ddd 23.2, 9.5, 3.5 Hz)  
t08-a 2.29 (dddd 13.5, 9.5, 8.6, 8.5 Hz)  
t08-b 2.86 (dddd 13.5, 10.1, 7.4, 3.5 Hz)  
q09-H 3.04 (s)  
q11-H 1.93 (d, 6.5 Hz)

Coupling constants were determined by total lineshape simulation in xsim in anatolia mode.

Experiment Bruker\_31, 2D 13C-1H via onebond

(HSQC): 7 peaks  
d05-H - d05  
q09-H - q09  
q11-H - q11  
t07-a - t07  
t07-b - t07  
t08-a - t08  
t08-b - t08

Experiment Bruker\_32, 2D 13C-1H via Jcoupling

(HMBC): 15 peaks  
q09-H - s01 t07  
q11-H - d05 t08  
t07-a - s01 t08  
t07-b - d05 s01 t08  
t08-a - d05 q11 s01 t07  
t08-b - s01 t07

Experiment Bruker\_30, 2D 1H-1H via Jcoupling

(COSY): 22 peaks  
d05-H - q09-H(weak) q11-H t08-a t08-b  
q09-H - d05-H(weak) t07-a  
q11-H - d05-H  
t07-a - q09-H(weak) t07-b t08-a t08-b  
t07-b - t07-a t08-a t08-b  
t08-a - d05-H t07-a t07-b t08-b  
t08-b - d05-H t07-a t07-b t08-a

Experiment Bruker\_33, 2D 1H-1H via through-

space (NOESY): 11 peaks  
d05-H - q11-H t08-b  
q09-H - t07-b?  
q11-H - d05-H t08-a  
t07-a - t08-b  
t07-b - t08-a  
t08-a - q11-H t07-b  
t08-b - d05-H t07-a

Lowest conformer of molecule A (DFT/PBE/L1)

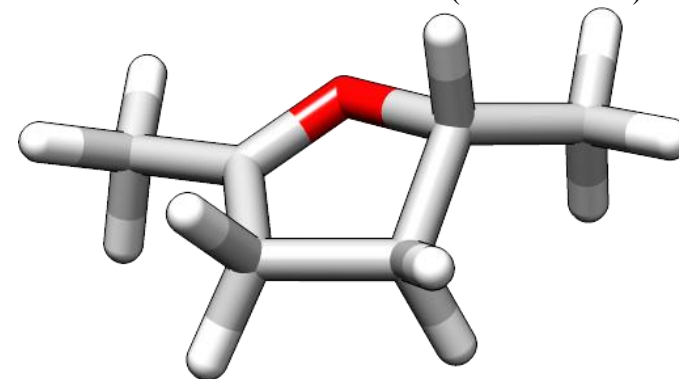

Dihedral t08Hb-C-C-t07Hb is close to 90°, and corresponding vicinal coupling constant is 3.5 Hz only.



Molecule B (dehydrogenation product)

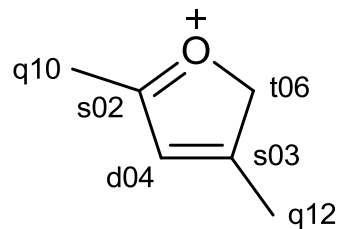

Experiment Bruker\_28, 1D 13C: 6 peaks

s02 219.5  
s03 200.4  
d04 127.3  
t06 91.3  
q10 18.8  
q12 14.2

Experiment Bruker\_26, 1D 1H: 4 peaks

d04-H 7.25 (s)  
t06-H 6.01 (q 3 Hz)  
q10-H 3.05 (t 3 Hz)  
q12-H 2.75 (s)

Experiment Bruker\_31, 2D 13C-1H via onebond  
(HSQC): 4 peaks

d04-H - d04  
q10-H - q10  
q12-H - q12  
t06-H - t06

Experiment Bruker\_32, 2D 13C-1H via Jcoupling  
(HMBC): 14 peaks

d04-H - q12 s02 s03 t06  
q10-H - d04 s02  
q12-H - d04 s02(weak) s03 t06  
t06-H - d04 q10(weak) s02 s03

Experiment Bruker\_30, 2D 1H-1H via Jcoupling  
(COSY): 5 peaks

d04-H - q12-H?(weak) t06-a(weak) t06-b(weak)

q10-H - t06-a(weak) t06-b(weak)  
t06-H - d04-H(weak) q10-H(weak)

Experiment Bruker\_33, 2D 1H-1H via through-  
space (NOESY): 6 peaks

d04-H - q10-H q12-H  
q10-H - d04-H  
q12-H - d04-H t06-a t06-b  
t06-H - q12-H

Molecule C: product of cracking

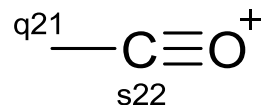

Experiment Bruker\_28, 1D 13C: 2 peaks

q21 4.2

s22 151.0

Experiment Bruker\_26, 1D 1H: 1 peaks

q21-H 4.00

Experiment Bruker\_31, 2D 13C-1H via onebond

(HSQC): 1 peaks

q21-H - q21

Experiment Bruker\_32, 2D 13C-1H via Jcoupling

(HMBC): 1 peaks

q21-H - s22

Molecule D: product of cracking

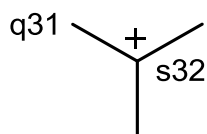

Experiment Bruker\_28, 1D 13C: 2 peaks

q31 46.9

s32 336.3

Experiment Bruker\_26, 1D 1H: 1 peaks

q31-H 3.96

Experiment Bruker\_31, 2D 13C-1H via onebond

(HSQC): 1 peaks

q31-H - q31

Experiment Bruker\_32, 2D 13C-1H via Jcoupling

(HMBC): 2 peaks

q31-H - q31 s32

<sup>1</sup>H NMR spectrum (600 MHz)

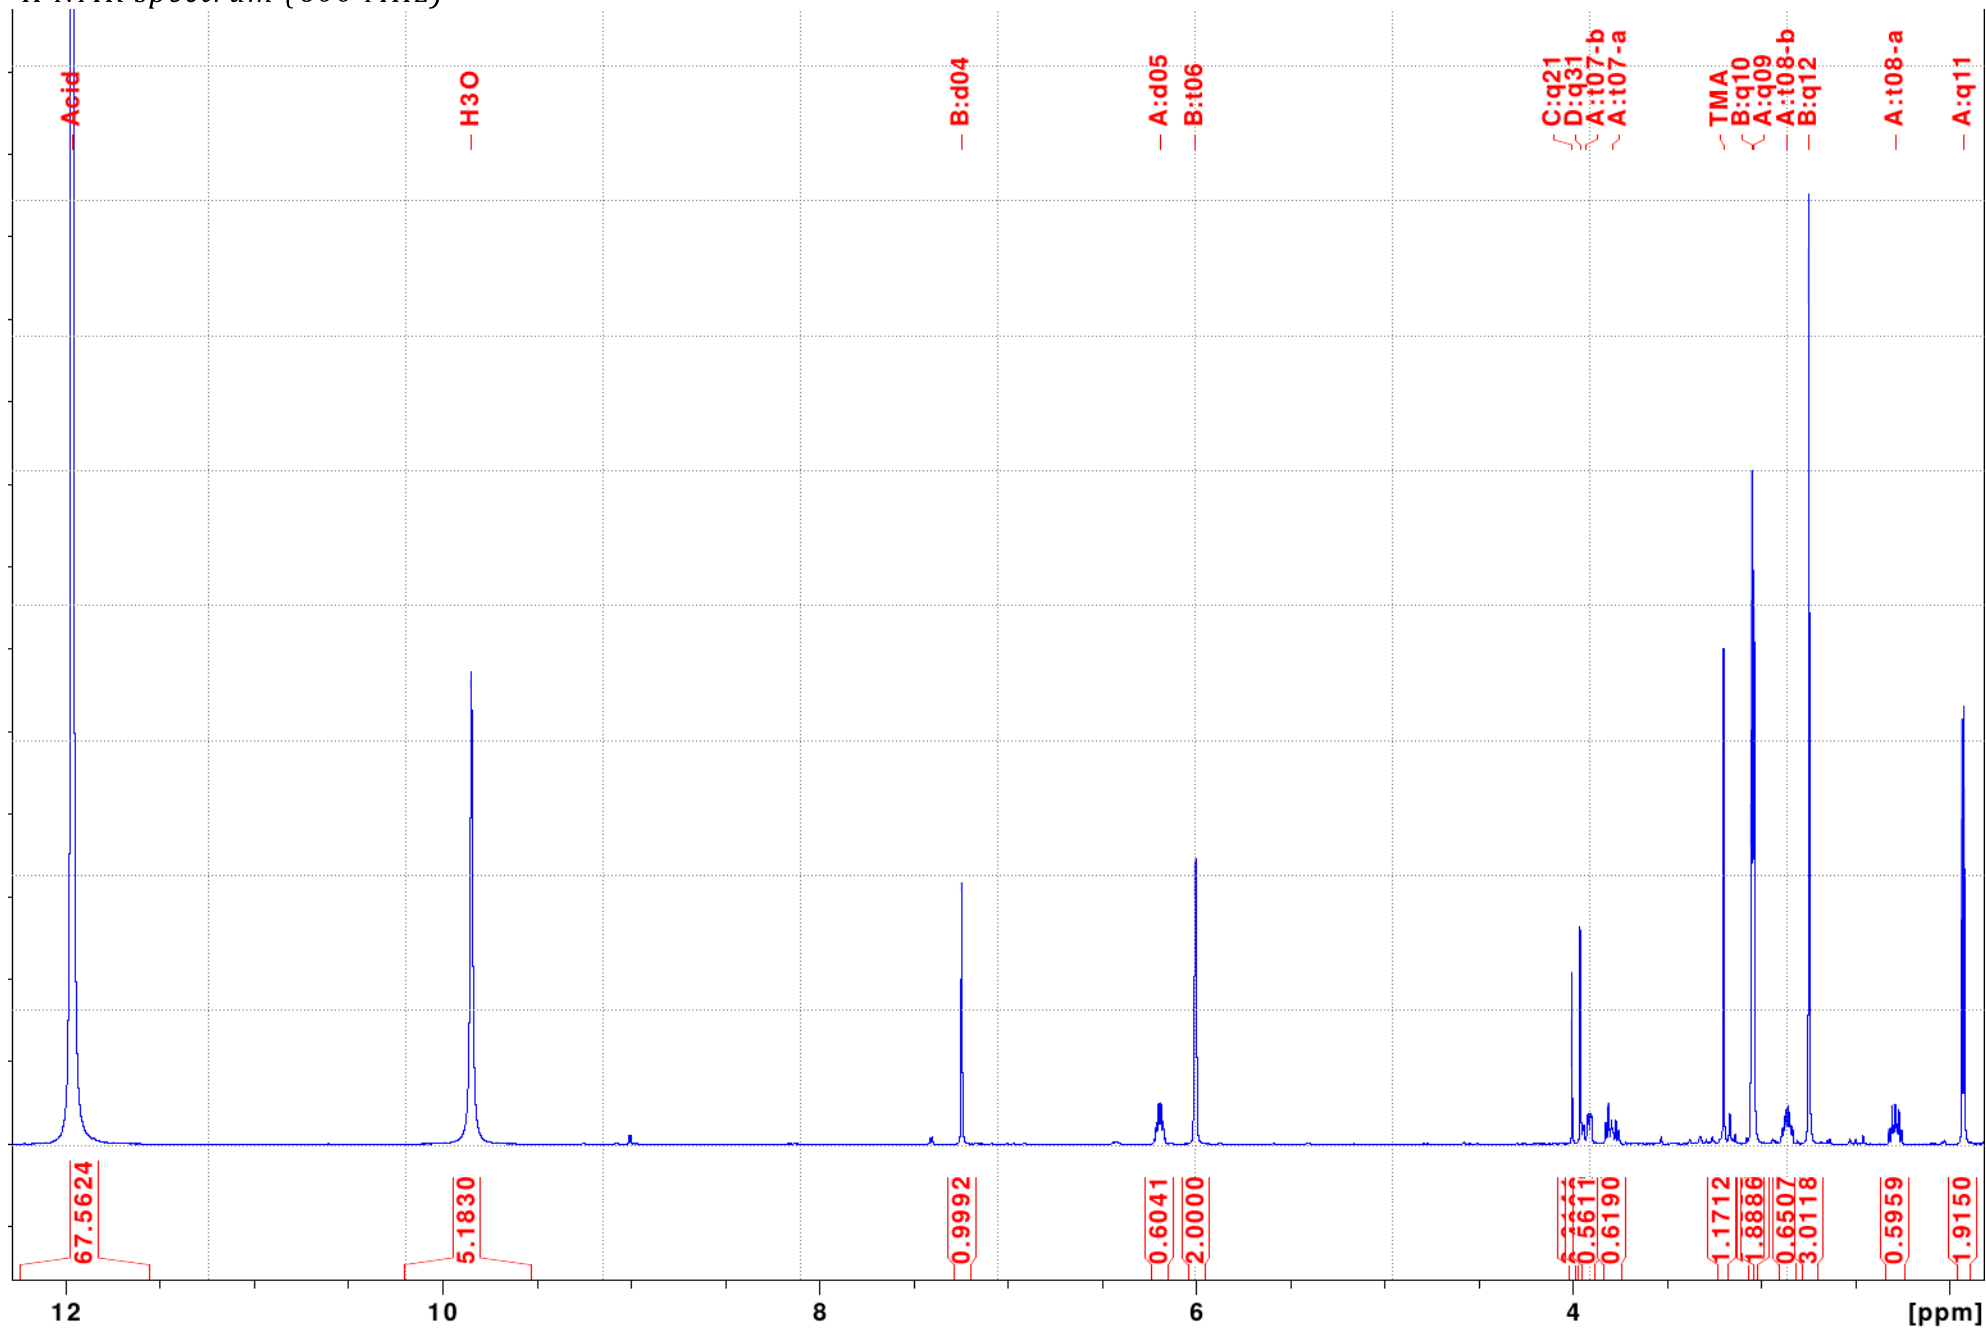

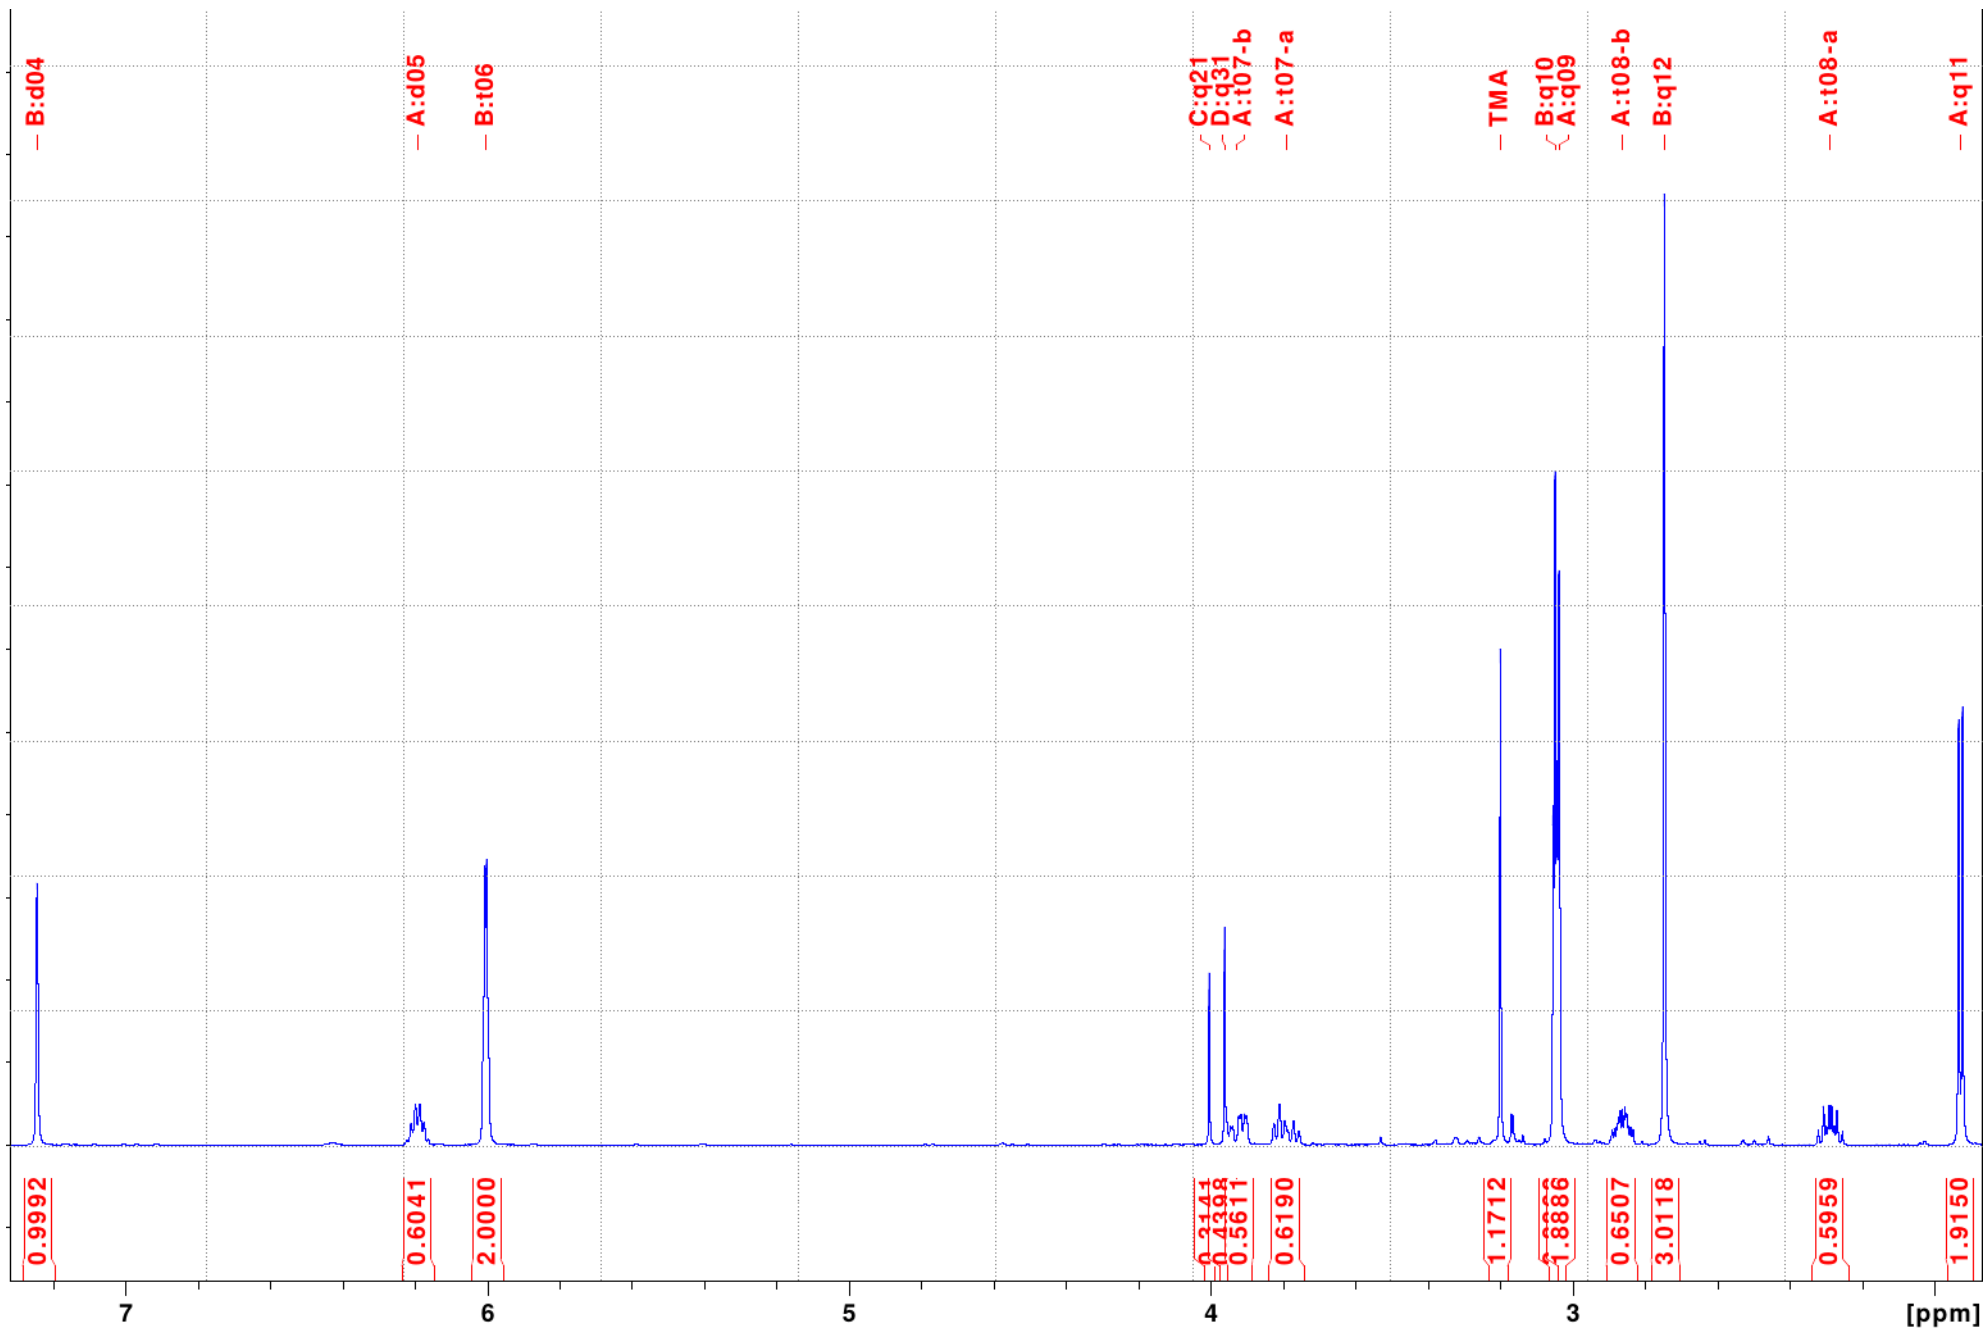

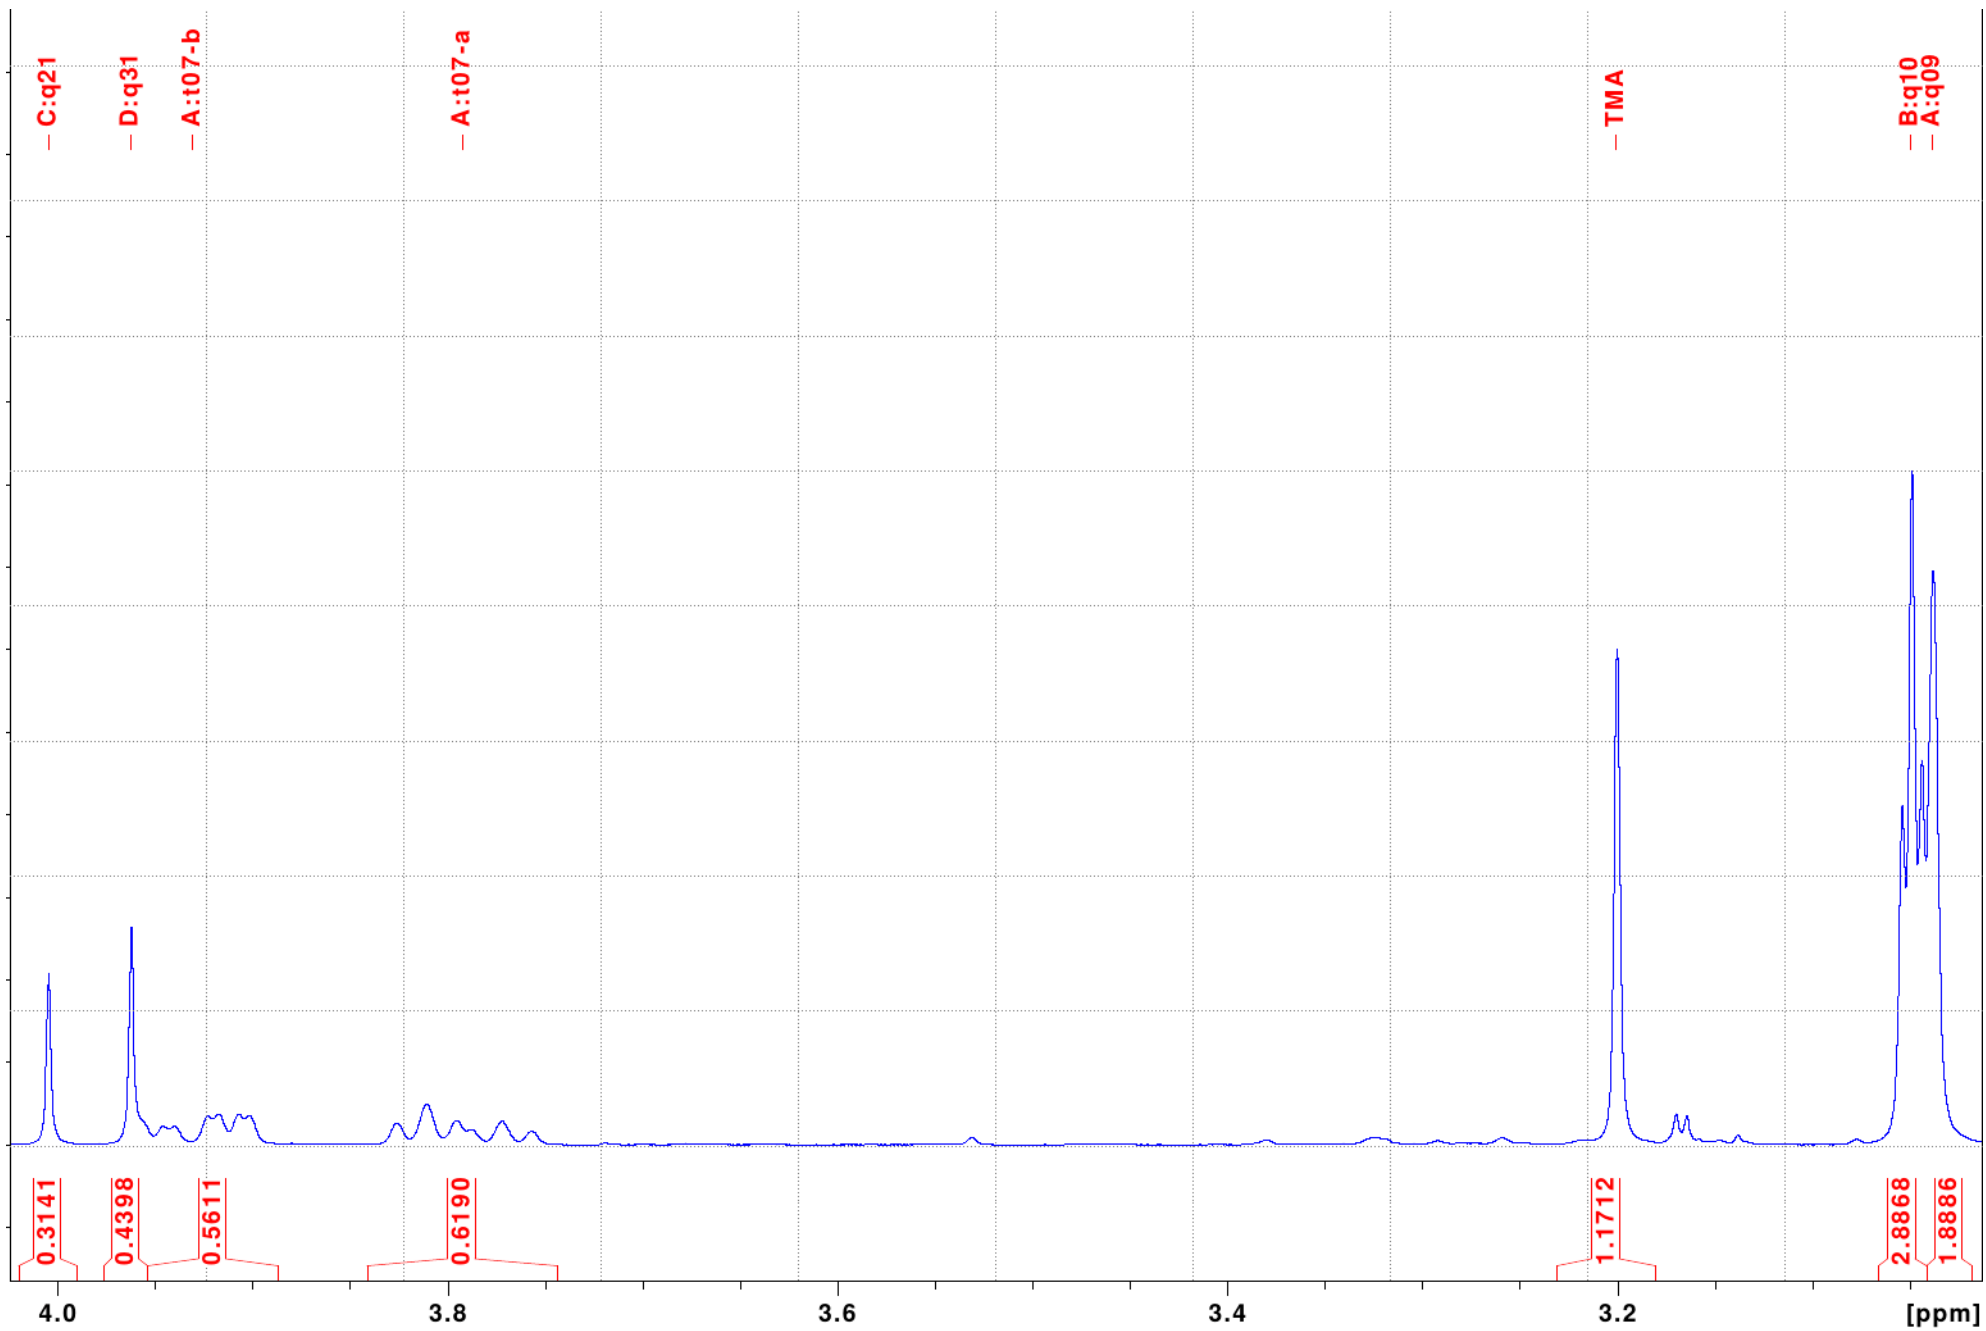

$^{13}\text{C}\{^1\text{H}\}$  NMR spectrum (151 MHz)

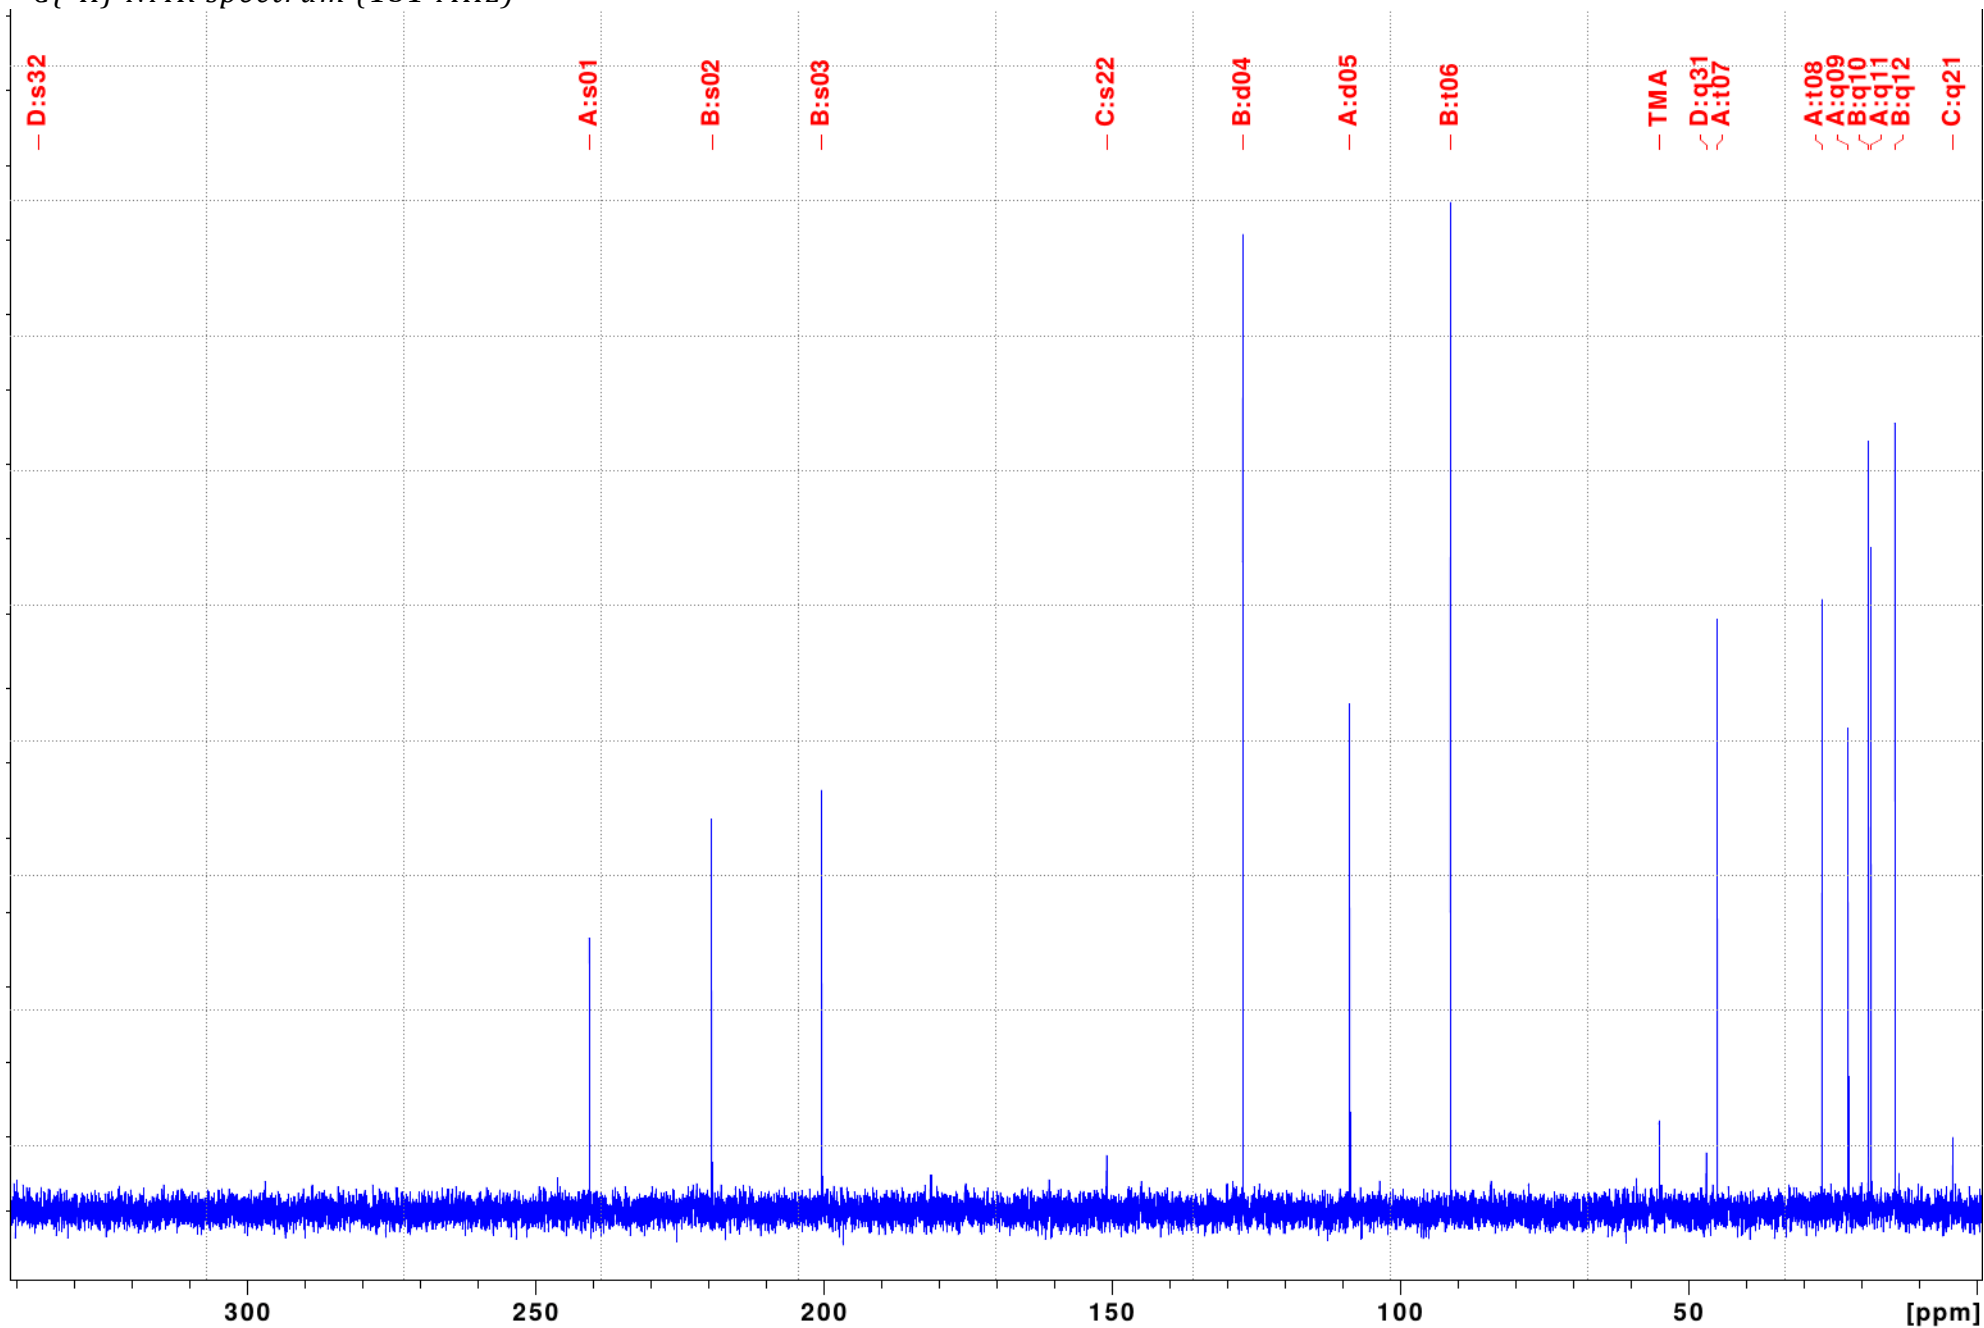

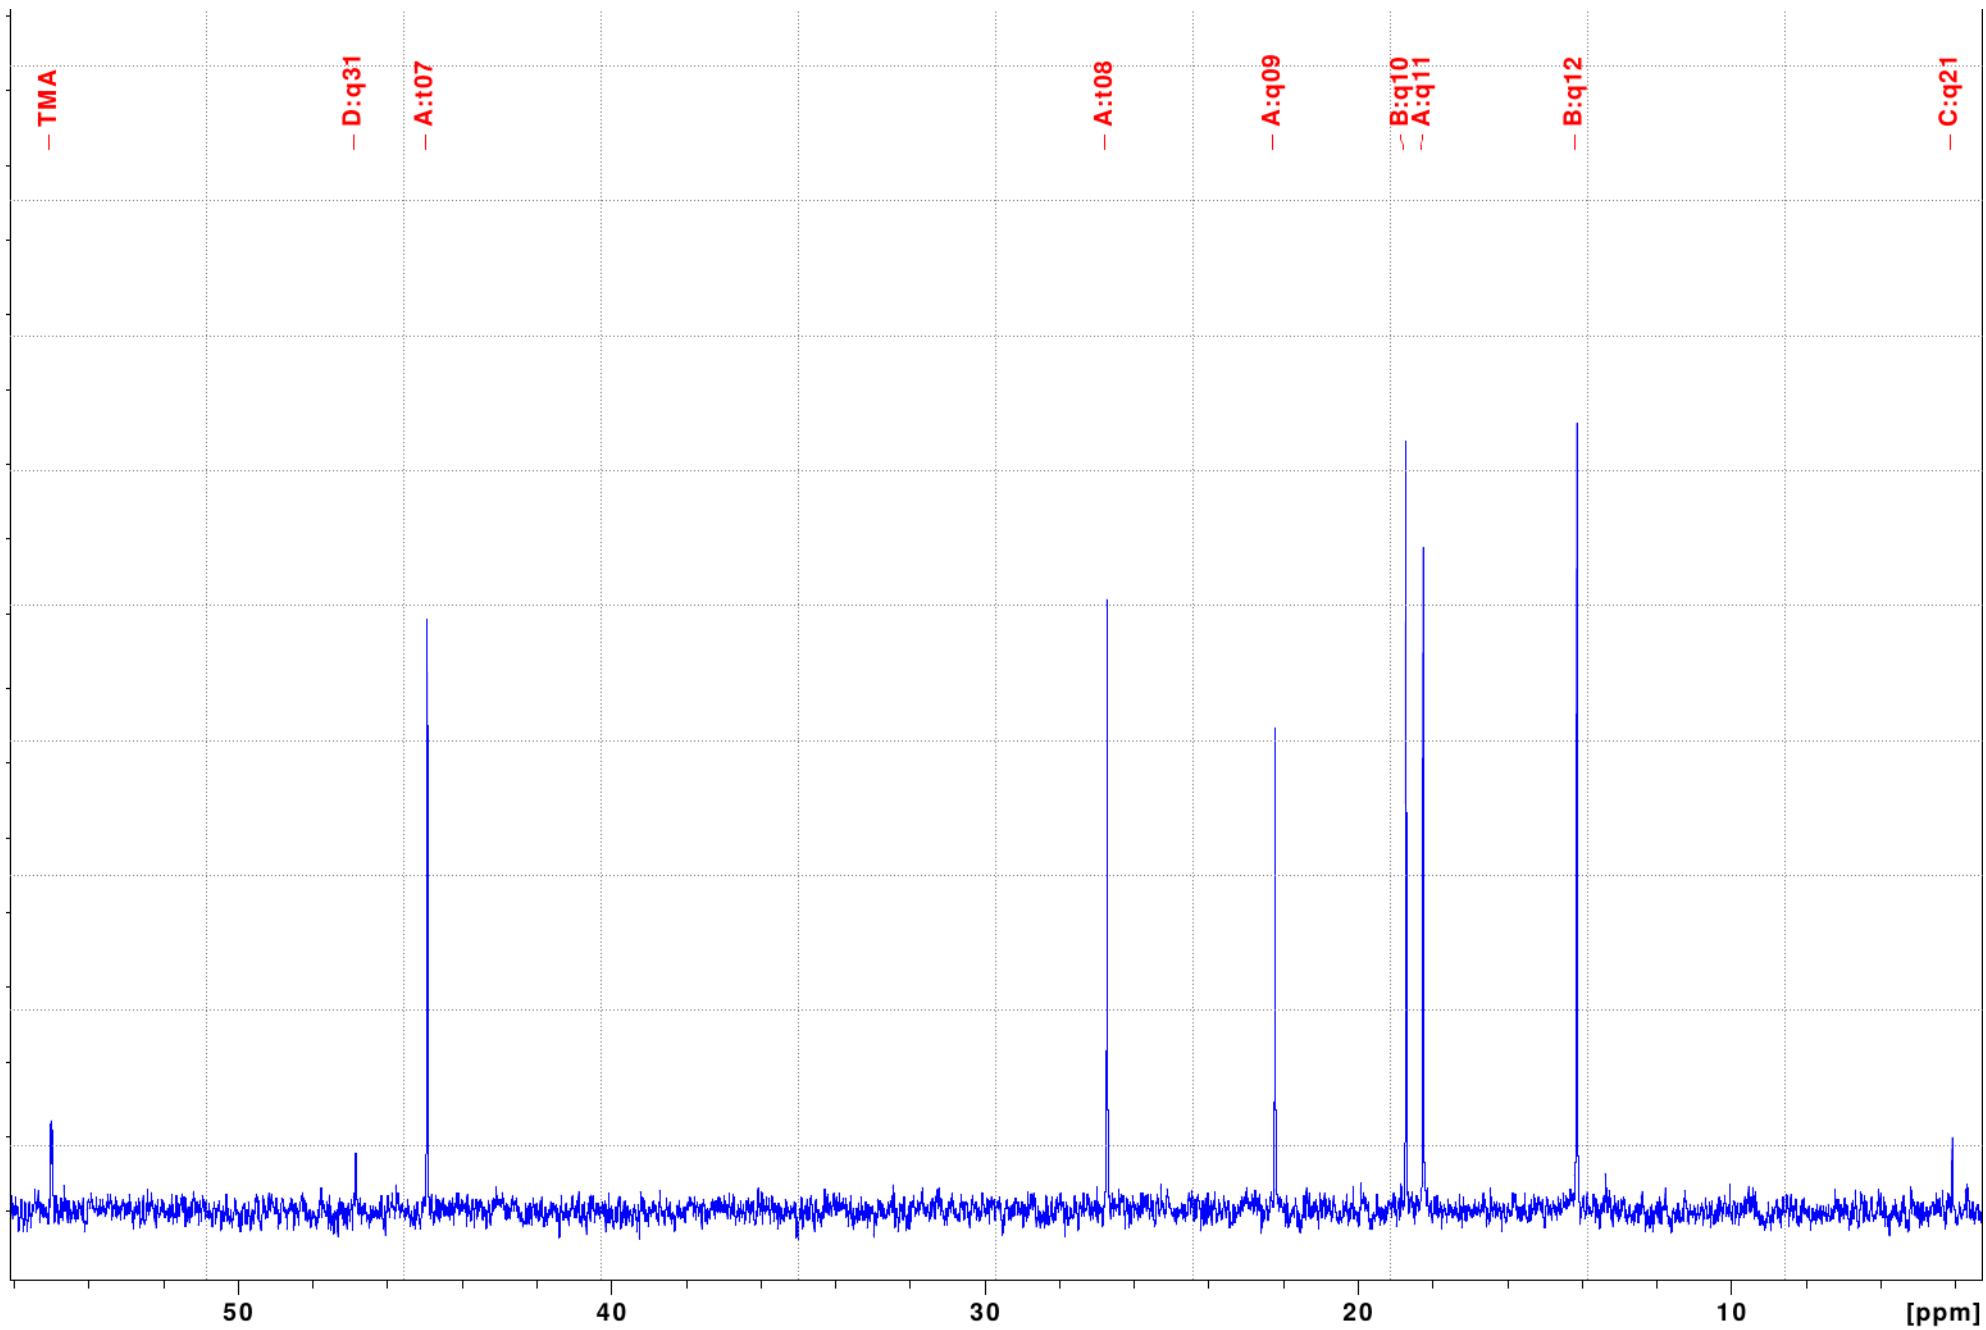





## Kinetics data

Chemical exchanges observed for protonated mesityl oxide **55** (cation **56**) and methods for determining their rate constants:

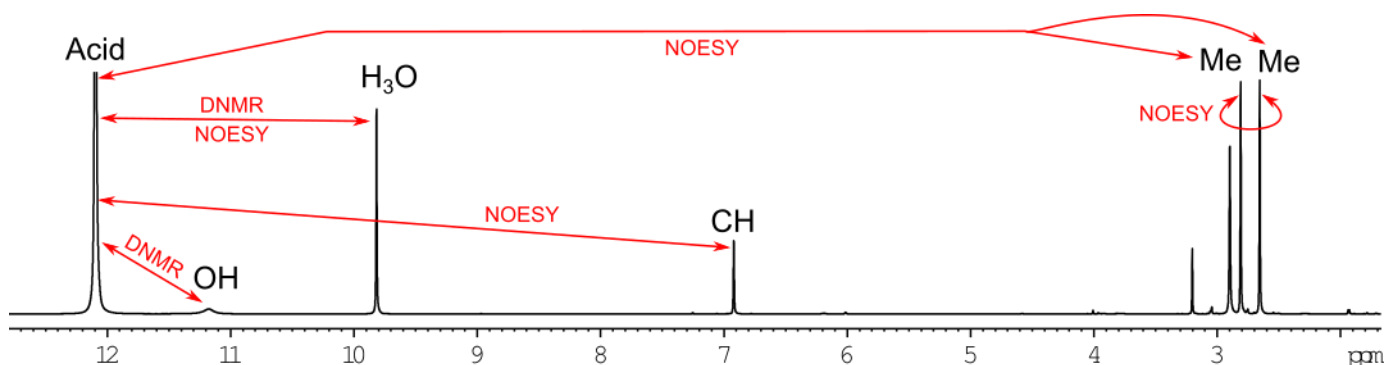

Table S1. Rate constants ( $s^{-1}$ ) and Eyring's activation parameters for chemical exchanges and irreversible destruction of protonated mesityl oxide **55** (cation **56**) in  $FSO_3H-SbF_5$ .

| Temperature, K                                              | Process |                             |         |          |                      |                              |
|-------------------------------------------------------------|---------|-----------------------------|---------|----------|----------------------|------------------------------|
|                                                             | OH-Acid | $H_3O^+$ -Acid <sup>a</sup> | CH-Acid | Me-Me    | Me-Acid <sup>a</sup> | Destruction (by integration) |
| 271.7                                                       | 155     | 3.2                         | 0.10    | 0.076    |                      |                              |
| 283.8                                                       | 284     | 6.3                         | 0.18    | 0.171    | 0.0211               |                              |
| 296.1                                                       | 455     | 10.1, 14.7 <sup>b</sup>     | 0.34    | 0.354    | 0.0410               | 7.4e-05                      |
| 306.6                                                       | 703     | 33.0                        | 0.64    | 0.668    | 0.0828               | 2.2e-04                      |
| 316.3                                                       |         | 98.4                        | 1.54    | 1.524    | 0.1519               | 6.3e-04                      |
| 326.0                                                       |         |                             |         |          |                      | 2.1e-03                      |
| $\Delta H^\ddagger$ , kcal mol <sup>-1</sup>                | 6.5±0.2 | 12±2                        | 9.5±1.0 | 10.6±0.6 | 10.3±0.6             | 21±1                         |
| $\Delta S^\ddagger$ , cal mol <sup>-1</sup> K <sup>-1</sup> | -24±1   | -14±6                       | -28±3   | -25±2    | -32±2                | -8±4                         |

<sup>a</sup> To calculate the activation parameters, the rate constants were divided by three.

<sup>b</sup> From NOESY and DNMR, respectively.

## Quantum chemical calculations by DFT/PBE/ $\Lambda$ 01

See also [http://limor1.nioch.nsc.ru/quant/H\\_AlCl3/](http://limor1.nioch.nsc.ru/quant/H_AlCl3/)

Structures are in XMol xyz format.

Energy and ZPE are in hartree, Dipole in D, G(298) is Gibbs energy correction at 298 K in kcal/mol, Edisp is Grimme's DFT-D3/BJ dispersion correction in kcal/mol [S. Grimme, J. Antony, S. Ehrlich and H. Krieg, J. Chem. Phys. 132 (2010), 154104; S. Grimme, S. Ehrlich and L. Goerigk, J. Comput. Chem. 32 (2011), 1456-1465]].

### *Benzene C<sub>6</sub>H<sub>6</sub>*

12

Energy -232.0024519633 Dipole 0.000273 ZPE 0.097880 G(298) 45.63 HoF 17.12 kcal  
sigma 12 Edisp -6.86

|   |             |             |             |
|---|-------------|-------------|-------------|
| C | -0.02168251 | 0.75392639  | -1.17665293 |
| C | -0.67935738 | 1.22089984  | -0.03525456 |
| C | -0.65789262 | 0.46684623  | 1.14132250  |
| C | 0.02167092  | -0.75393696 | 1.17664413  |
| C | 0.67946644  | -1.22084201 | 0.03527875  |
| C | 0.65799486  | -0.46679830 | -1.14129199 |
| H | -1.21111378 | 2.17593570  | -0.06292895 |
| H | -1.17209355 | 0.83239227  | 2.03440698  |
| H | 0.03823966  | -1.34403257 | 2.09704463  |
| H | 1.21109333  | -2.17595053 | 0.06295139  |
| H | 1.17231003  | -0.83226225 | -2.03434517 |
| H | -0.03863540 | 1.34382218  | -2.09717477 |

### *Cation 15*

18

Energy -401.82633783932 Charge 1 Dipole 7.996010 ZPE 0.138536 G(298.15) 65.47 HoF  
224.74 kcal Edisp -11.79

|   |             |             |             |
|---|-------------|-------------|-------------|
| C | 2.17420327  | -0.51987839 | -0.00012086 |
| C | 1.16807623  | 0.42576870  | -0.00020847 |
| C | -0.24009410 | 0.18263880  | -0.00004984 |
| C | 3.49901207  | -0.14917307 | -0.00019521 |
| C | -1.10414612 | 1.30914473  | -0.00005608 |
| C | -2.48183704 | 1.14037696  | 0.00009753  |
| C | -3.02095445 | -0.15122397 | 0.00026212  |
| C | -2.18184846 | -1.27789701 | 0.00023847  |
| C | -0.80617408 | -1.11865721 | 0.00009272  |
| N | 4.62792013  | 0.13813367  | -0.00026199 |
| H | 1.99152208  | -1.59868497 | 0.00018881  |
| H | 1.46921438  | 1.47975802  | -0.00041877 |
| H | -0.67426348 | 2.31484989  | -0.00018450 |
| H | -3.14117989 | 2.01080398  | 0.00011769  |
| H | -4.10563082 | -0.28640058 | 0.00038344  |
| H | -2.61621490 | -2.27982677 | 0.00035848  |
| H | -0.16666412 | -2.00466856 | 0.00007245  |
| H | 5.60905931  | 0.38493578  | -0.00031600 |

### *Cation 17*

18

Energy -401.791379338 Charge 1 Dipole 4.686244 ZPE 0.139243 G(298.15) 66.42 HoF  
246.67 kcal Edisp -11.96

|   |             |             |             |
|---|-------------|-------------|-------------|
| C | 2.39422656  | -0.56298679 | -0.00033560 |
| C | 1.32177012  | 0.46809889  | -0.00032638 |
| C | -0.04820848 | 0.24166398  | -0.00001956 |
| C | 3.74460145  | -0.01177150 | -0.00026973 |
| C | -0.91560547 | 1.39053969  | 0.00013001  |
| C | -2.28652241 | 1.22722544  | 0.00036416  |
| C | -2.82433974 | -0.07145728 | 0.00037303  |
| C | -1.99748915 | -1.21705097 | 0.00016943  |
| C | -0.62779730 | -1.07354605 | 0.00003170  |
| N | 4.81463404  | 0.43961971  | -0.00008142 |
| H | 2.26864044  | -1.22991107 | -0.87931229 |
| H | 2.26859848  | -1.22997377 | 0.87858200  |
| H | 1.65699568  | 1.51374569  | -0.00054726 |
| H | -0.47240889 | 2.39046538  | 0.00008741  |

|   |             |             |             |
|---|-------------|-------------|-------------|
| H | -2.94948810 | 2.09487225  | 0.00055900  |
| H | -3.91088069 | -0.20053103 | 0.00053095  |
| H | -2.45016491 | -2.21087168 | 0.00016078  |
| H | 0.01343839  | -1.95813091 | -0.00009624 |

### Dication 18

19  
Energy -401.9828606863 Charge 2 Dipole 9.879303 ZPE 0.149630 G(298.15) 72.84 HoF  
495.02 kcal Edisp -12.21

|   |             |             |             |
|---|-------------|-------------|-------------|
| C | 2.07933775  | -0.58331193 | -0.00058269 |
| C | 0.99953420  | 0.48006990  | -0.00032820 |
| C | -0.35073399 | 0.22303781  | -0.00000384 |
| C | 3.43575748  | -0.07140821 | 0.00008133  |
| C | -1.24146550 | 1.37424097  | -0.00001047 |
| C | -2.60513420 | 1.19314635  | 0.00011942  |
| C | -3.12745695 | -0.11787201 | 0.00027613  |
| C | -2.28629086 | -1.26259300 | 0.00025162  |
| C | -0.92248167 | -1.10819373 | 0.00016248  |
| N | 4.52138473  | 0.30080902  | 0.00061085  |
| H | 5.49868117  | 0.61630893  | 0.00108467  |
| H | 1.99808828  | -1.24465987 | -0.89138356 |
| H | 1.99757552  | -1.24578371 | 0.88931170  |
| H | 1.32662292  | 1.52647157  | -0.00054909 |
| H | -0.81311720 | 2.38108655  | -0.00013681 |
| H | -3.28156516 | 2.05141304  | 0.00015241  |
| H | -4.21374945 | -0.25983167 | 0.00040290  |
| H | -2.73396638 | -2.25945090 | 0.00036329  |
| H | -0.28102070 | -1.99347913 | 0.00017786  |

### Dication 23

19  
Energy -401.9848858883 Charge 2 Dipole 10.215255 ZPE 0.151173 G(298.15) 73.05 HoF  
493.75 kcal Edisp -12.10

|   |             |             |             |
|---|-------------|-------------|-------------|
| C | 1.82301184  | -0.12097371 | 0.79296033  |
| C | 0.69220815  | 0.65311855  | 0.31887845  |
| C | -0.47696261 | 0.12652427  | -0.20517428 |
| C | 2.92011428  | 0.39947285  | 1.28549888  |
| C | -1.49375988 | 1.07546365  | -0.62499668 |
| C | -2.68115355 | 0.62782099  | -1.15489008 |
| C | -2.90031986 | -0.76209264 | -1.28590388 |
| C | -1.92735979 | -1.71476909 | -0.88539419 |
| C | -0.73468747 | -1.29028024 | -0.35397928 |
| N | 3.98829313  | 0.84991118  | 1.76365530  |
| H | 4.81151865  | 1.06233984  | 1.16340114  |
| H | 1.82305717  | -1.22251541 | 0.76465550  |
| H | 0.78164447  | 1.74280986  | 0.38576966  |
| H | -1.30252642 | 2.14689088  | -0.51419598 |
| H | -3.45148085 | 1.33453347  | -1.47316542 |
| H | -3.84687859 | -1.11643337 | -1.70835106 |
| H | -2.13605361 | -2.78077301 | -1.00361404 |
| H | 0.00754699  | -2.03190990 | -0.04888829 |
| H | 4.10378796  | 1.02086184  | 2.78373392  |

### Structure 19

22  
Energy -2024.410595006 Charge 1 Dipole 9.980140 ZPE 0.145424 G(298.15) 61.64 Edisp  
-17.07

|   |             |             |             |
|---|-------------|-------------|-------------|
| C | 1.28663382  | -0.66220119 | -0.70195873 |
| C | 0.05504594  | 0.18870146  | -0.62266986 |
| C | -1.22085156 | -0.23137011 | -0.28535921 |
| C | 2.46941507  | 0.06558097  | -0.26187801 |
| C | -2.27891745 | 0.74932482  | -0.32506485 |
| C | -3.57377591 | 0.39177034  | -0.01456483 |
| C | -3.85836333 | -0.93922032 | 0.34237871  |
| C | -2.84481964 | -1.92059298 | 0.39172829  |
| C | -1.54418853 | -1.58327686 | 0.08891642  |
| N | 3.38515114  | 0.67402567  | 0.09480544  |
| H | 1.44821675  | -0.94587079 | -1.76665270 |

|    |             |             |             |
|----|-------------|-------------|-------------|
| H  | 1.21496932  | -1.60333438 | -0.13250018 |
| H  | 0.19237897  | 1.24382167  | -0.88914409 |
| H  | -2.03649042 | 1.77835736  | -0.60473837 |
| H  | -4.37475799 | 1.13345225  | -0.04292418 |
| H  | -4.88578237 | -1.22032383 | 0.59113697  |
| H  | -3.09666590 | -2.94436400 | 0.67642585  |
| H  | -0.76483792 | -2.34663215 | 0.13749546  |
| Al | 4.93030566  | 1.88303477  | 0.74793431  |
| Cl | 5.04538072  | 1.25028097  | 2.77566885  |
| Cl | 6.47772180  | 1.28434727  | -0.57621930 |
| Cl | 3.97423182  | 3.75448906  | 0.37718401  |

**Pre-reaction complex, TS and product of the reaction 17+C<sub>6</sub>H<sub>6</sub>→27**

30

Energy -633.8137028568 Charge 1 Dipole 5.711246 ZPE 0.238783 G(298) 121.80 HoF  
251.33 kcal Edisp -25.65

|   |             |             |             |
|---|-------------|-------------|-------------|
| C | 1.96271805  | -1.10180067 | -1.53350458 |
| C | 0.87351449  | -0.10711012 | -1.28873365 |
| C | -0.47067828 | -0.41472739 | -1.04892864 |
| C | 3.30214983  | -0.56087571 | -1.32717079 |
| C | -1.42748028 | 0.64951094  | -1.11952805 |
| C | -2.78431095 | 0.38228291  | -1.02312187 |
| C | -3.21697098 | -0.93536008 | -0.82893209 |
| C | -2.29448643 | -1.99501114 | -0.71550315 |
| C | -0.94058680 | -1.74585480 | -0.81355097 |
| N | 4.35884673  | -0.11430888 | -1.14418834 |
| H | 1.87446869  | -1.39869441 | -2.60341195 |
| H | 1.83954158  | -2.03074714 | -0.95406710 |
| H | 1.11918827  | 0.93313859  | -1.52198631 |
| H | -1.07303685 | 1.66802360  | -1.29393221 |
| H | -3.51221058 | 1.19215658  | -1.10497621 |
| H | -4.28750302 | -1.14727307 | -0.75908953 |
| H | -2.65551348 | -3.01273430 | -0.55253716 |
| H | -0.23267308 | -2.57242038 | -0.72305114 |
| C | 0.47628180  | -0.26443982 | 2.23756876  |
| C | -0.56802684 | 0.65802230  | 2.31009630  |
| C | -0.41769782 | 1.94908947  | 1.76546742  |
| C | 0.77240490  | 2.31115866  | 1.13877241  |
| C | 1.81270310  | 1.37664063  | 1.03503112  |
| C | 1.66456484  | 0.08905650  | 1.59301561  |
| H | -1.49736939 | 0.39271407  | 2.82090941  |
| H | -1.22784567 | 2.67597844  | 1.86726959  |
| H | 0.90553579  | 3.32339313  | 0.74811168  |
| H | 2.76672482  | 1.65848816  | 0.58062304  |
| H | 2.50631399  | -0.60837535 | 1.56133533  |
| H | 0.37143357  | -1.24992071 | 2.69801310  |

30

Energy -633.8083589647 Charge 1 Dipole 3.090101 ZPE 0.239204 G(298.15) 123.54 HoF  
254.68 kcal Edisp -25.31

|   |             |             |             |
|---|-------------|-------------|-------------|
| C | 1.62988512  | -1.03721512 | -1.16335761 |
| C | 0.47972234  | -0.15853500 | -0.71018287 |
| C | -0.87476767 | -0.62191917 | -0.90964458 |
| C | 2.93091617  | -0.38184987 | -1.16546097 |
| C | -1.88646605 | 0.33420315  | -1.17950379 |
| C | -3.18091438 | -0.07352783 | -1.47232025 |
| C | -3.49852042 | -1.43815471 | -1.47056501 |
| C | -2.51500354 | -2.39676486 | -1.18657929 |
| C | -1.21486748 | -1.99712135 | -0.90921981 |
| N | 3.96641234  | 0.14592392  | -1.17954749 |
| H | 1.39521638  | -1.31972914 | -2.21006758 |
| H | 1.69005472  | -1.98877733 | -0.60885408 |
| H | 0.64324527  | 0.91283467  | -0.86831597 |
| H | -1.63299211 | 1.39842227  | -1.18340304 |
| H | -3.94904755 | 0.66765203  | -1.70365094 |
| H | -4.52029774 | -1.75841804 | -1.68956931 |
| H | -2.77190330 | -3.45825110 | -1.18520207 |
| H | -0.46051172 | -2.75657508 | -0.68730784 |
| C | 0.73763097  | 0.01286702  | 1.44175868  |
| C | -0.22948186 | 1.03422077  | 1.69850336  |

|   |             |             |            |
|---|-------------|-------------|------------|
| C | 0.17642633  | 2.32845763  | 1.96348762 |
| C | 1.55056778  | 2.63366961  | 2.01081057 |
| C | 2.51856955  | 1.63763373  | 1.82725089 |
| C | 2.12102247  | 0.32994383  | 1.58274628 |
| H | -1.29233232 | 0.78401134  | 1.65429855 |
| H | -0.56124882 | 3.11324780  | 2.14561600 |
| H | 1.86652412  | 3.66163250  | 2.20877489 |
| H | 3.58023518  | 1.88339767  | 1.89682632 |
| H | 2.87202349  | -0.45903250 | 1.50806861 |
| H | 0.42990274  | -1.03224685 | 1.54461073 |

30

Energy -633.8126296082 Charge 1 Dipole 4.607619 ZPE 0.240421 G(298) 124.22 HoF  
252.00 kcal Edisp -24.83

|   |             |             |             |
|---|-------------|-------------|-------------|
| C | 1.57331849  | -0.96500661 | -1.24020340 |
| C | 0.49222526  | -0.06127701 | -0.59592813 |
| C | -0.89941371 | -0.56813155 | -0.86368833 |
| C | 2.88513960  | -0.33451353 | -1.29332824 |
| C | -1.80599959 | 0.24480474  | -1.56437025 |
| C | -3.07955163 | -0.22854045 | -1.88348206 |
| C | -3.46587319 | -1.51261640 | -1.49243681 |
| C | -2.57398902 | -2.32641860 | -0.78471369 |
| C | -1.30025030 | -1.85645518 | -0.47057918 |
| N | 3.91591711  | 0.20600964  | -1.30540584 |
| H | 1.24224948  | -1.16538456 | -2.27462002 |
| H | 1.64768664  | -1.94654939 | -0.74239253 |
| H | 0.60536507  | 0.95316758  | -1.00888190 |
| H | -1.50631762 | 1.24938491  | -1.87950450 |
| H | -3.77141272 | 0.40807641  | -2.43986677 |
| H | -4.46557631 | -1.88108897 | -1.73453234 |
| H | -2.87442473 | -3.33081179 | -0.47775904 |
| H | -0.61743664 | -2.51160635 | 0.08208414  |
| C | 0.73932861  | 0.11572849  | 1.04245254  |
| C | -0.21635695 | 1.12774897  | 1.51137948  |
| C | 0.19771728  | 2.26752340  | 2.15336854  |
| C | 1.57666121  | 2.47536009  | 2.38095454  |
| C | 2.54109132  | 1.52037546  | 2.01659504  |
| C | 2.14220012  | 0.35310339  | 1.40055642  |
| H | -1.27336837 | 0.96754407  | 1.27783996  |
| H | -0.52468876 | 3.02045559  | 2.47608372  |
| H | 1.90128743  | 3.40051259  | 2.86758566  |
| H | 3.59521789  | 1.69321598  | 2.24385982  |
| H | 2.88097857  | -0.42426081 | 1.19576053  |
| H | 0.43827547  | -0.89035012 | 1.40317263  |

**Pre-reaction complex, TS and product of the reaction 18+C<sub>6</sub>H<sub>6</sub>→28**

31

Energy -634.0138763207 Charge 2 Dipole 6.875100 ZPE 0.248187 G(298) 126.13 HoF  
494.22 kcal Edisp -24.16

|   |             |             |             |
|---|-------------|-------------|-------------|
| C | 1.20446588  | -0.67259922 | -1.32982857 |
| C | -0.18834464 | -0.08967609 | -1.23614284 |
| C | -1.34718304 | -0.85078416 | -1.23250935 |
| C | 2.24565983  | 0.26580989  | -0.96795946 |
| C | -2.60533235 | -0.14633613 | -1.34200299 |
| C | -3.79034655 | -0.84568635 | -1.41384574 |
| C | -3.76819060 | -2.25414497 | -1.36903397 |
| C | -2.55422568 | -2.97089441 | -1.25389506 |
| C | -1.35953727 | -2.29080538 | -1.17985738 |
| N | 3.12129193  | 0.98493091  | -0.77541798 |
| H | 3.87976730  | 1.62571687  | -0.53535425 |
| H | 1.41151729  | -0.98470541 | -2.38019591 |
| H | 1.34778013  | -1.56854972 | -0.69694138 |
| H | -0.27385072 | 0.99576876  | -1.34142194 |
| H | -2.60406802 | 0.94673984  | -1.38273896 |
| H | -4.74191677 | -0.31713035 | -1.50675655 |
| H | -4.71104921 | -2.80763784 | -1.42199134 |
| H | -2.57254279 | -4.06270472 | -1.22213851 |
| H | -0.42930042 | -2.85695846 | -1.08736454 |
| C | 0.26512111  | 0.93157968  | 1.54944421  |
| C | 0.52936992  | 2.29625545  | 1.31226392  |

|   |             |             |            |
|---|-------------|-------------|------------|
| C | 1.75158997  | 2.84401170  | 1.70377851 |
| C | 2.70787671  | 2.03476672  | 2.33747736 |
| C | 2.45077828  | 0.67135100  | 2.56794526 |
| C | 1.23544213  | 0.11789909  | 2.16946264 |
| H | -0.24300805 | 2.94120357  | 0.88351494 |
| H | 1.94371119  | 3.91154371  | 1.56548316 |
| H | 3.64383482  | 2.47666235  | 2.69317934 |
| H | 3.18641932  | 0.06067160  | 3.09825139 |
| H | 1.00602452  | -0.92466113 | 2.40846297 |
| H | -0.74175420 | 0.53836321  | 1.38613302 |

31

Energy -634.011884243 Charge 2 Dipole 9.354475 ZPE 0.248775 G(298.15) 129.08 HoF  
495.47 kcal Edisp -25.18

|   |             |             |             |
|---|-------------|-------------|-------------|
| C | 1.44846427  | -1.08012698 | -1.06822736 |
| C | 0.28387489  | -0.16219865 | -0.66743363 |
| C | -1.04127496 | -0.65050933 | -0.88799832 |
| C | 2.71194178  | -0.41579301 | -1.27368198 |
| C | -2.07649822 | 0.30197062  | -1.12669920 |
| C | -3.35995938 | -0.12210411 | -1.42752579 |
| C | -3.65144244 | -1.49591461 | -1.46131647 |
| C | -2.65002393 | -2.45052613 | -1.20544948 |
| C | -1.35951337 | -2.03841606 | -0.91950801 |
| N | 3.72211783  | 0.07272316  | -1.52823751 |
| H | 4.62637324  | 0.48555155  | -1.76973968 |
| H | 1.21524474  | -1.54185327 | -2.05374220 |
| H | 1.62404218  | -1.91971306 | -0.36926138 |
| H | 0.44988284  | 0.90398133  | -0.84667492 |
| H | -1.84525743 | 1.37106819  | -1.10364614 |
| H | -4.14405609 | 0.60864859  | -1.63862606 |
| H | -4.66914589 | -1.82818734 | -1.68439199 |
| H | -2.89362091 | -3.51496962 | -1.23053190 |
| H | -0.59959012 | -2.79734157 | -0.71071909 |
| C | 0.57974171  | 0.05825737  | 1.52798456  |
| C | -0.36309332 | 1.10332679  | 1.77443070  |
| C | 0.07091514  | 2.38404773  | 2.07317428  |
| C | 1.44883419  | 2.65079926  | 2.15753955  |
| C | 2.39710251  | 1.62688370  | 1.97052049  |
| C | 1.97137155  | 0.33817749  | 1.68626165  |
| H | -1.43229940 | 0.88113397  | 1.72055567  |
| H | -0.65022349 | 3.18224733  | 2.26479069  |
| H | 1.78878362  | 3.66219527  | 2.39849042  |
| H | 3.45929789  | 1.84438479  | 2.10864872  |
| H | 2.69804778  | -0.48062163 | 1.65519501  |
| H | 0.23996281  | -0.97712178 | 1.63581937  |

31

Energy -634.0222181129 Charge 2 Dipole 11.481274 ZPE 0.249394 G(298) 129.34 HoF  
488.99 kcal Edisp -24.58

|   |             |             |             |
|---|-------------|-------------|-------------|
| C | 1.48248808  | -1.10524552 | -1.08594690 |
| C | 0.43787641  | -0.04068568 | -0.55068569 |
| C | -0.95903899 | -0.54272871 | -0.83565937 |
| C | 2.66987821  | -0.56315794 | -1.68355025 |
| C | -1.78908521 | 0.18922892  | -1.70137098 |
| C | -3.06897493 | -0.27849572 | -2.00500584 |
| C | -3.52826723 | -1.47368650 | -1.44556540 |
| C | -2.70753910 | -2.20677055 | -0.57919776 |
| C | -1.42918628 | -1.74290075 | -0.27272085 |
| N | 3.58668834  | -0.11179551 | -2.21771278 |
| H | 4.40135106  | 0.23615688  | -2.72716926 |
| H | 0.99339651  | -1.67702960 | -1.90233428 |
| H | 1.78467754  | -1.85402947 | -0.33035105 |
| H | 0.59411759  | 0.90158956  | -1.10062195 |
| H | -1.43640856 | 1.12488519  | -2.14746809 |
| H | -3.70844190 | 0.29282016  | -2.68197227 |
| H | -4.53223476 | -1.83616991 | -1.67967549 |
| H | -3.06867029 | -3.13957363 | -0.14023675 |
| H | -0.80728806 | -2.33529749 | 0.41010063  |
| C | 0.64617942  | 0.28919060  | 0.99876641  |
| C | -0.41340638 | 1.17428592  | 1.52466414  |
| C | -0.14451690 | 2.14734479  | 2.45887305  |

|   |             |             |            |
|---|-------------|-------------|------------|
| C | 1.18528719  | 2.36812756  | 2.86957045 |
| C | 2.25908338  | 1.59140808  | 2.37486747 |
| C | 2.01305002  | 0.59325425  | 1.46489176 |
| H | -1.43294367 | 1.01103143  | 1.16059233 |
| H | -0.94943913 | 2.76676926  | 2.86251028 |
| H | 1.39569355  | 3.16428843  | 3.59202457 |
| H | 3.27364740  | 1.78461501  | 2.73229293 |
| H | 2.84340593  | -0.03832392 | 1.13192544 |
| H | 0.40862077  | -0.68910514 | 1.50616550 |

*Pre-reaction complex, TS and product of the reaction 19+C<sub>6</sub>H<sub>6</sub>→29*

34

Energy -2256.432181406 Charge 1 Dipole 11.265106 ZPE 0.244961 G(298) 117.73 Edisp -32.04

|    |             |             |             |
|----|-------------|-------------|-------------|
| C  | 0.89877899  | -1.31331629 | -0.98458638 |
| C  | -0.28648737 | -0.40554204 | -0.74240474 |
| C  | -1.61672718 | -0.86864086 | -0.89377926 |
| C  | 2.17076795  | -0.61205009 | -0.98520596 |
| C  | -2.64943656 | 0.09346411  | -1.10614184 |
| C  | -3.95130691 | -0.31465163 | -1.34049790 |
| C  | -4.26165482 | -1.68344105 | -1.34326390 |
| C  | -3.26354032 | -2.64825276 | -1.12221963 |
| C  | -1.95580054 | -2.25291479 | -0.90016699 |
| N  | 3.16887672  | -0.02962927 | -1.01522255 |
| H  | 0.77781681  | -1.76229806 | -1.99323871 |
| H  | 0.95183464  | -2.16153646 | -0.28006616 |
| H  | -0.10361646 | 0.66645538  | -0.85506512 |
| H  | -2.39587172 | 1.15726370  | -1.10709804 |
| H  | -4.73450077 | 0.42423457  | -1.52297044 |
| H  | -5.29200659 | -2.00415534 | -1.51837748 |
| H  | -3.52196869 | -3.70928576 | -1.12746136 |
| H  | -1.19022713 | -3.01340145 | -0.72720266 |
| C  | -0.07656338 | 0.01738873  | 1.73156736  |
| C  | -0.77407552 | 1.25263038  | 1.68087324  |
| C  | -0.08007108 | 2.44893751  | 1.79774098  |
| C  | 1.31221420  | 2.43141320  | 1.98330649  |
| C  | 2.00984423  | 1.21567031  | 2.07550115  |
| C  | 1.32068492  | 0.01541461  | 1.96149059  |
| H  | -1.86051924 | 1.25328092  | 1.55955636  |
| H  | -0.61175089 | 3.40242142  | 1.75719830  |
| H  | 1.86339485  | 3.37163771  | 2.06226875  |
| H  | 3.09280706  | 1.21605998  | 2.22867581  |
| H  | 1.85623524  | -0.93121258 | 2.07987642  |
| H  | -0.64071716 | -0.91454402 | 1.82224861  |
| Al | 4.78723897  | 1.23554402  | -0.84371837 |
| Cl | 5.55129211  | 0.52719216  | 1.01890807  |
| Cl | 5.85146046  | 0.84266651  | -2.62536589 |
| Cl | 3.65359519  | 3.05319723  | -0.72515874 |

34

Energy -2256.432171365 Charge 1 Dipole 10.775056 ZPE 0.245046 G(298.15) 119.06 Edisp -32.32

|   |             |             |             |
|---|-------------|-------------|-------------|
| C | 0.89887070  | -1.31653632 | -0.97259331 |
| C | -0.26994589 | -0.39384095 | -0.68884071 |
| C | -1.60922690 | -0.84542637 | -0.86045918 |
| C | 2.17892504  | -0.63080949 | -0.98894658 |
| C | -2.62518674 | 0.12312883  | -1.10529564 |
| C | -3.92736157 | -0.27450452 | -1.36131157 |
| C | -4.25325506 | -1.63895788 | -1.35202853 |
| C | -3.27012565 | -2.60966878 | -1.09746126 |
| C | -1.96220716 | -2.22385225 | -0.85425624 |
| N | 3.18031246  | -0.05430278 | -1.02937624 |
| H | 0.74775492  | -1.74145359 | -1.98719052 |
| H | 0.95613443  | -2.17967809 | -0.28733591 |
| H | -0.07657198 | 0.67247283  | -0.83528904 |
| H | -2.36130691 | 1.18446871  | -1.11665292 |
| H | -4.69773315 | 0.47083945  | -1.57033342 |
| H | -5.28320347 | -1.95110902 | -1.54370848 |
| H | -3.53850123 | -3.66824698 | -1.09298393 |
| H | -1.20890277 | -2.99025463 | -0.65473863 |

|    |             |             |             |
|----|-------------|-------------|-------------|
| C  | -0.06015029 | -0.02409790 | 1.68048600  |
| C  | -0.78671742 | 1.19903369  | 1.68335729  |
| C  | -0.11866349 | 2.40528816  | 1.82798486  |
| C  | 1.27702868  | 2.41357312  | 1.99426441  |
| C  | 2.00387846  | 1.21271204  | 2.04556417  |
| C  | 1.34113351  | 0.00165231  | 1.90546884  |
| H  | -1.87378476 | 1.17811278  | 1.57031071  |
| H  | -0.67158304 | 3.34742402  | 1.82276200  |
| H  | 1.80794397  | 3.36392175  | 2.09131721  |
| H  | 3.08813446  | 1.23289664  | 2.18851052  |
| H  | 1.89926820  | -0.93498954 | 1.99549129  |
| H  | -0.60294120 | -0.96710726 | 1.78703681  |
| Al | 4.78458039  | 1.22766585  | -0.85257762 |
| Cl | 5.54065479  | 0.52998310  | 1.01846849  |
| Cl | 5.86810570  | 0.85199394  | -2.62502006 |
| Cl | 3.62464302  | 3.02966912  | -0.73462280 |

34

Energy -2256.44117238 Charge 1 Dipole 5.029519 ZPE 0.247022 G(298) 121.81 Edisp -  
33.12

|    |             |             |             |
|----|-------------|-------------|-------------|
| C  | 0.78930593  | -1.40541720 | -0.88716222 |
| C  | -0.24997525 | -0.33250314 | -0.43100201 |
| C  | -1.66335066 | -0.78590867 | -0.70867185 |
| C  | 2.11003104  | -0.81329523 | -0.97234939 |
| C  | -2.44051555 | -0.08602206 | -1.64386271 |
| C  | -3.73661969 | -0.51157039 | -1.94472073 |
| C  | -4.26676171 | -1.63635416 | -1.31127781 |
| C  | -3.49907325 | -2.33908532 | -0.37567690 |
| C  | -2.20551994 | -1.91562419 | -0.07462078 |
| N  | 3.10184323  | -0.21558068 | -1.01270078 |
| H  | 0.50103825  | -1.74717176 | -1.89750106 |
| H  | 0.81454527  | -2.29830343 | -0.24070180 |
| H  | -0.04339143 | 0.56534341  | -1.03498004 |
| H  | -2.02900330 | 0.79413806  | -2.14843937 |
| H  | -4.33226459 | 0.04034916  | -2.67550583 |
| H  | -5.28188480 | -1.96758489 | -1.54249510 |
| H  | -3.91170855 | -3.22073022 | 0.12010966  |
| H  | -1.62127795 | -2.48248727 | 0.65934607  |
| C  | -0.06353523 | 0.12413009  | 1.12782447  |
| C  | -0.54560079 | 1.51868009  | 1.20477646  |
| C  | 0.26356785  | 2.54012086  | 1.62255449  |
| C  | 1.58488148  | 2.25640246  | 2.04933998  |
| C  | 2.05778431  | 0.92612155  | 2.15719200  |
| C  | 1.27663130  | -0.10206629 | 1.70863442  |
| H  | -1.56306460 | 1.71670653  | 0.85150691  |
| H  | -0.09184633 | 3.57282311  | 1.61976705  |
| H  | 2.22798472  | 3.07538089  | 2.38113273  |
| H  | 3.05938789  | 0.74001690  | 2.55246485  |
| H  | 1.63893949  | -1.13120093 | 1.79769972  |
| H  | -0.77581138 | -0.53691765 | 1.66774887  |
| Al | 4.56941368  | 1.15934644  | -0.73769803 |
| Cl | 5.46742510  | 0.40293456  | 1.04017314  |
| Cl | 5.60596422  | 1.23475862  | -2.56702156 |
| Cl | 3.25246123  | 2.86057075  | -0.35388284 |

### Structures 25 and 15+C<sub>6</sub>H<sub>6</sub>

30  
Energy -633.7928895381 Charge 1 Dipole 6.649794 HoF 264.39

|   |             |             |             |
|---|-------------|-------------|-------------|
| C | -1.15064769 | -0.76940387 | 1.68378472  |
| C | -0.63101197 | -0.26472134 | 0.37711478  |
| C | -0.29149632 | 1.21838009  | 0.44912051  |
| C | -2.30554096 | -1.41966018 | 1.80253208  |
| C | -0.99500022 | 2.12286623  | -0.35658652 |
| C | -0.71692515 | 3.49052191  | -0.28975395 |
| C | 0.27123635  | 3.96346846  | 0.57521234  |
| C | 0.97945719  | 3.06586787  | 1.37969138  |
| C | 0.69884392  | 1.70026808  | 1.31608257  |
| N | -3.43057979 | -1.85694066 | 1.91365728  |
| H | -3.64829110 | -2.85935410 | 1.95776538  |
| H | -0.61631220 | -0.52584365 | 2.60719647  |



|   |             |             |             |
|---|-------------|-------------|-------------|
| H | -1.39827122 | -0.41101725 | -0.39923693 |
| H | -1.77581460 | 1.76069132  | -1.03256806 |
| H | -1.27901987 | 4.18753586  | -0.91595275 |
| H | 0.49012874  | 5.03266233  | 0.62589099  |
| H | 1.75009717  | 3.43092431  | 2.06265479  |
| H | 1.25952677  | 1.01626048  | 1.96428366  |
| C | 0.65145671  | -1.07505562 | -0.13144513 |
| C | 1.25902618  | -0.49019452 | -1.33427576 |
| C | 1.54966184  | -1.24969501 | -2.44500325 |
| C | 1.29539686  | -2.63372151 | -2.42958895 |
| C | 0.75464967  | -3.27047808 | -1.29268947 |
| C | 0.42673650  | -2.52260655 | -0.18786035 |
| H | 1.46731487  | 0.58333248  | -1.32245527 |
| H | 1.98337315  | -0.78700581 | -3.33440663 |
| H | 1.51440082  | -3.22868143 | -3.32144698 |
| H | 0.57482883  | -4.34779921 | -1.30961726 |
| H | -0.04796937 | -2.98896288 | 0.68088157  |
| H | 1.36074489  | -0.87163776 | 0.70701875  |

30

Energy -633.8390353571 Charge 1 Dipole 6.863551 HoF 235.43

|   |             |             |             |
|---|-------------|-------------|-------------|
| C | -1.57262331 | -0.43028619 | 1.94788825  |
| C | -0.71012874 | 0.12781630  | 1.01511858  |
| C | -0.43128024 | 1.51750982  | 0.85628939  |
| C | -1.76044420 | -1.78061660 | 2.02980784  |
| C | 0.48742457  | 1.89192070  | -0.16132477 |
| C | 0.80346513  | 3.22753944  | -0.36566366 |
| C | 0.21216776  | 4.21076624  | 0.43660865  |
| C | -0.69919644 | 3.86016943  | 1.44750611  |
| C | -1.02088032 | 2.53070263  | 1.65932468  |
| N | -2.04898532 | -2.92558077 | 2.05495017  |
| H | -1.76418383 | -3.79905734 | 2.49787696  |
| H | -2.13602147 | 0.16358086  | 2.67417862  |
| H | -0.19387699 | -0.56008638 | 0.33282277  |
| H | 0.93757837  | 1.10965100  | -0.77957818 |
| H | 1.50997478  | 3.51147614  | -1.14836299 |
| H | 0.46048236  | 5.26328910  | 0.27677671  |
| H | -1.15272419 | 4.63844238  | 2.06481491  |
| H | -1.73151796 | 2.27396898  | 2.44848617  |
| C | 2.04879449  | -2.19244855 | -0.81412409 |
| C | 2.00819468  | -1.25004637 | -1.84744962 |
| C | 0.85469399  | -1.11490297 | -2.62814115 |
| C | -0.25962810 | -1.92223546 | -2.37710986 |
| C | -0.21640752 | -2.87165014 | -1.35049926 |
| C | 0.93746990  | -3.00621239 | -0.56909494 |
| H | 2.88897967  | -0.63794387 | -2.06085835 |
| H | 0.83108454  | -0.39446746 | -3.45032934 |
| H | -1.15332318 | -1.82978191 | -2.99972225 |
| H | -1.07519174 | -3.52802422 | -1.18292034 |
| H | 0.98859044  | -3.77150969 | 0.21100025  |
| H | 2.95751284  | -2.31198272 | -0.21827127 |

### Structures 26 and 16+C<sub>6</sub>H<sub>6</sub>

33

Energy -2256.065694597 Dipole 13.398734

|    |             |             |             |
|----|-------------|-------------|-------------|
| C  | -1.01070317 | -0.10869202 | 1.56088273  |
| C  | -0.33860800 | 0.30222698  | 0.31613325  |
| C  | 0.02328534  | 1.78034829  | 0.35209778  |
| C  | -1.82918216 | -1.19579870 | 1.54742150  |
| C  | -0.55562845 | 2.66067021  | -0.57034371 |
| C  | -0.24083846 | 4.02157032  | -0.54695969 |
| C  | 0.66133470  | 4.51716387  | 0.39636002  |
| C  | 1.24396190  | 3.64536041  | 1.32014301  |
| C  | 0.92605757  | 2.28609310  | 1.29718640  |
| N  | -2.50077976 | -2.16326129 | 1.43377294  |
| Al | -2.71658014 | -4.07374075 | 1.15218071  |
| H  | -0.75181195 | 0.34749039  | 2.51777429  |
| H  | -1.00624440 | 0.12158676  | -0.53986507 |
| H  | -1.26600829 | 2.27811532  | -1.30961957 |
| H  | -0.70638960 | 4.69678150  | -1.26953983 |

|    |             |             |             |
|----|-------------|-------------|-------------|
| H  | 0.90855309  | 5.58150060  | 0.41487660  |
| H  | 1.94801505  | 4.02536794  | 2.06485563  |
| H  | 1.38649157  | 1.61757506  | 2.03311913  |
| C  | 0.96681078  | -0.54854476 | -0.04728008 |
| C  | 1.57441956  | -0.02164708 | -1.28079331 |
| C  | 1.58363441  | -0.74613081 | -2.45070326 |
| C  | 1.12594234  | -2.07819762 | -2.46200394 |
| C  | 0.71064782  | -2.70353570 | -1.26972612 |
| C  | 0.65697709  | -1.98536819 | -0.09940134 |
| H  | 1.94830835  | 1.00504248  | -1.26573292 |
| H  | 1.96917470  | -0.29876172 | -3.37043568 |
| H  | 1.10856252  | -2.63838287 | -3.40077595 |
| H  | 0.39519412  | -3.74981991 | -1.27327481 |
| H  | 0.29184959  | -2.48254373 | 0.80561219  |
| H  | 1.61888333  | -0.31621965 | 0.81512982  |
| Cl | -2.92409924 | -4.20775772 | -0.98932178 |
| Cl | -4.39568927 | -4.70457365 | 2.30872341  |
| Cl | -0.80554091 | -4.86391708 | 1.80950766  |

33

Energy -2256.140973513 Dipole 12.798221

|    |             |             |             |
|----|-------------|-------------|-------------|
| C  | -1.44756558 | 0.10482761  | 1.71699791  |
| C  | -0.57969670 | 0.65913610  | 0.82553416  |
| C  | -0.21430726 | 2.05994321  | 0.73369933  |
| C  | -1.72017315 | -1.26934283 | 1.70392666  |
| C  | 0.70116720  | 2.43934737  | -0.27144051 |
| C  | 1.09047511  | 3.76906289  | -0.41228710 |
| C  | 0.57394338  | 4.74165184  | 0.44711354  |
| C  | -0.33494961 | 4.37999984  | 1.45061133  |
| C  | -0.72660669 | 3.05501311  | 1.59464600  |
| N  | -1.96095627 | -2.40888347 | 1.70968436  |
| Al | -2.29257517 | -4.36565696 | 1.62541072  |
| H  | -1.97530183 | 0.68292594  | 2.48048439  |
| H  | -0.10341095 | -0.01021523 | 0.09863859  |
| H  | 1.10056092  | 1.66995294  | -0.93914604 |
| H  | 1.79943699  | 4.04910186  | -1.19498743 |
| H  | 0.87812555  | 5.78584634  | 0.33868875  |
| H  | -0.73750574 | 5.14169852  | 2.12256834  |
| H  | -1.43594043 | 2.79170841  | 2.38329689  |
| C  | 2.24605111  | -1.77579535 | -0.85544123 |
| C  | 2.37807826  | -0.81508725 | -1.86381406 |
| C  | 1.33301750  | -0.60478547 | -2.77012454 |
| C  | 0.15679612  | -1.35527862 | -2.66710407 |
| C  | 0.02682765  | -2.31958183 | -1.66233713 |
| C  | 1.07240638  | -2.53005374 | -0.75578959 |
| H  | 3.30302813  | -0.23761618 | -1.95057554 |
| H  | 1.43982030  | 0.13698404  | -3.56697090 |
| H  | -0.65745392 | -1.19622033 | -3.37960988 |
| H  | -0.88586717 | -2.91880551 | -1.58328217 |
| H  | 0.96720503  | -3.29191358 | 0.02322161  |
| H  | 3.06539273  | -1.94539550 | -0.15126422 |
| Cl | -3.02241638 | -4.59606006 | -0.37797679 |
| Cl | -3.71169793 | -4.67307763 | 3.18955610  |
| Cl | -0.32590758 | -5.15343049 | 1.95807253  |

### Structures **30** and **20**+C<sub>6</sub>H<sub>6</sub>

33

Energy -2256.040859473 Dipole 14.059794

|    |             |             |             |
|----|-------------|-------------|-------------|
| C  | -0.57486091 | 0.54793175  | 1.73728237  |
| C  | -0.09448717 | -0.08582583 | 0.43872469  |
| C  | -0.79856644 | 0.45405021  | -0.79303424 |
| C  | 0.03730351  | -0.05381455 | 2.87033860  |
| C  | -1.60056083 | -0.39343551 | -1.56909196 |
| C  | -2.26942329 | 0.09812246  | -2.69174820 |
| C  | -2.13677092 | 1.43860600  | -3.05635527 |
| C  | -1.33711976 | 2.29061564  | -2.28969588 |
| C  | -0.67201119 | 1.79881639  | -1.16763138 |
| N  | 0.60717335  | -0.61978009 | 3.72522577  |
| Al | -2.69232969 | 0.21185513  | 2.04183654  |
| H  | -0.51536508 | 1.64885868  | 1.77141786  |

|    |             |             |             |
|----|-------------|-------------|-------------|
| H  | -0.29332460 | -1.16634073 | 0.51848454  |
| H  | -1.73216121 | -1.43614144 | -1.26655461 |
| H  | -2.90526962 | -0.57067509 | -3.27727456 |
| H  | -2.66095792 | 1.82356938  | -3.93469715 |
| H  | -1.23860892 | 3.34431714  | -2.56191511 |
| H  | -0.06160998 | 2.48573509  | -0.56975179 |
| C  | 1.48426618  | 0.03730568  | 0.20986556  |
| C  | 1.80684633  | -0.87910996 | -0.89988189 |
| C  | 2.67247674  | -1.93172877 | -0.75059521 |
| C  | 3.35396835  | -2.11455251 | 0.47347596  |
| C  | 3.20335732  | -1.20478210 | 1.52715501  |
| C  | 2.33153341  | -0.14007923 | 1.40277183  |
| H  | 1.24393441  | -0.74651782 | -1.82807033 |
| H  | 2.84062988  | -2.63022190 | -1.57357292 |
| H  | 4.03066475  | -2.96580366 | 0.58955598  |
| H  | 3.78309899  | -1.32720068 | 2.44431702  |
| H  | 2.29762820  | 0.61638033  | 2.18651501  |
| H  | 1.57390863  | 1.08944477  | -0.12541992 |
| Cl | -3.74960373 | 1.58988149  | 0.76940906  |
| Cl | -2.98321112 | 0.66677678  | 4.12363973  |
| Cl | -2.95054765 | -1.87625706 | 1.52527490  |

33

Energy -2256.099636382 Dipole 7.665359

|    |             |             |             |
|----|-------------|-------------|-------------|
| C  | -0.78638709 | 1.32839743  | 1.89233638  |
| C  | -0.53314975 | 0.71942566  | 0.68067235  |
| C  | -1.16538783 | 0.97359044  | -0.59171889 |
| C  | 0.12776644  | 1.16282635  | 2.97644249  |
| C  | -0.80026324 | 0.14993952  | -1.68058339 |
| C  | -1.35849081 | 0.35235003  | -2.93882741 |
| C  | -2.28421925 | 1.38158364  | -3.13155830 |
| C  | -2.64926561 | 2.21211820  | -2.06341789 |
| C  | -2.09789767 | 2.01331559  | -0.80494797 |
| N  | 0.90174050  | 1.04814594  | 3.84128552  |
| Al | -2.53992323 | -0.35322057 | 2.59492955  |
| H  | -1.49451121 | 2.16082827  | 1.98545858  |
| H  | 0.25092985  | -0.04834739 | 0.67642678  |
| H  | -0.06888487 | -0.64790801 | -1.51974686 |
| H  | -1.07180695 | -0.29169242 | -3.77334926 |
| H  | -2.72268596 | 1.54359167  | -4.11970808 |
| H  | -3.36944034 | 3.01842042  | -2.22020051 |
| H  | -2.38851554 | 2.66966729  | 0.01830964  |
| C  | 3.50087021  | -0.34787111 | -0.21451475 |
| C  | 3.15062256  | -1.17181895 | -1.28841820 |
| C  | 2.35507643  | -2.30196382 | -1.07236980 |
| C  | 1.90807684  | -2.60644029 | 0.21757612  |
| C  | 2.26165603  | -1.78386119 | 1.29215269  |
| C  | 3.05827758  | -0.65435445 | 1.07611240  |
| H  | 3.50278990  | -0.93538777 | -2.29632973 |
| H  | 2.08836157  | -2.95181516 | -1.91077899 |
| H  | 1.28317250  | -3.48710794 | 0.38880502  |
| H  | 1.90951634  | -2.01819574 | 2.30013615  |
| H  | 3.32648946  | -0.01167940 | 1.91886638  |
| H  | 4.12443150  | 0.53430715  | -0.38318835 |
| Cl | -4.08690210 | 0.00844432  | 1.18159301  |
| Cl | -2.83455868 | 0.53441755  | 4.50085382  |
| Cl | -1.49748756 | -2.19970527 | 2.46770150  |

### Structures **31** and **21**+C<sub>6</sub>H<sub>6</sub>

34

Energy -2256.396506809 Charge 1 Dipole 9.764540

|   |             |             |             |
|---|-------------|-------------|-------------|
| C | -0.45898488 | 0.90787003  | 1.52654997  |
| C | -0.00492829 | -0.01395429 | 0.39731697  |
| C | -0.99343558 | -0.04181825 | -0.75089536 |
| C | 0.08806809  | 0.82090723  | 2.75632732  |
| C | -1.58693635 | -1.25560676 | -1.12719070 |
| C | -2.51302688 | -1.29065187 | -2.17112164 |
| C | -2.84167842 | -0.11948760 | -2.85671416 |
| C | -2.24383354 | 1.09263998  | -2.49597384 |
| C | -1.32112810 | 1.12853862  | -1.45215802 |

|    |             |             |             |
|----|-------------|-------------|-------------|
| N  | 0.66764334  | 0.75728302  | 3.80663724  |
| H  | 0.27757276  | 0.35896033  | 4.67151098  |
| Al | -2.56578063 | -0.06374128 | 2.50280928  |
| H  | -0.91023715 | 1.87614949  | 1.27226977  |
| H  | 0.09780166  | -1.03141055 | 0.80749835  |
| H  | -1.34988060 | -2.17218440 | -0.57941978 |
| H  | -2.98506822 | -2.23766705 | -2.44336582 |
| H  | -3.56375987 | -0.14859489 | -3.67623406 |
| H  | -2.49928834 | 2.01111027  | -3.02923372 |
| H  | -0.86609969 | 2.09031760  | -1.18494214 |
| C  | 1.44114648  | 0.37827838  | -0.16395061 |
| C  | 1.82616177  | -0.46456593 | -1.30710993 |
| C  | 3.07882962  | -1.02073665 | -1.41460165 |
| C  | 4.02661923  | -0.80218276 | -0.39556950 |
| C  | 3.73853493  | 0.01005698  | 0.71866934  |
| C  | 2.49507404  | 0.58637651  | 0.83889538  |
| H  | 1.06364533  | -0.65226309 | -2.06879659 |
| H  | 3.33719844  | -1.64447500 | -2.27329090 |
| H  | 5.01122336  | -1.27428895 | -0.47121071 |
| H  | 4.50367457  | 0.17921988  | 1.47964367  |
| H  | 2.28402199  | 1.23522797  | 1.69234827  |
| H  | 1.23761091  | 1.39180919  | -0.59455770 |
| Cl | -2.62990154 | 0.87612817  | 4.41396408  |
| Cl | -1.88727482 | -2.09010021 | 2.50374886  |
| Cl | -3.95358361 | 0.62285589  | 1.06814735  |

34

Energy -2256.445800682 Charge 1 Dipole 5.796751

|    |             |             |             |
|----|-------------|-------------|-------------|
| C  | -2.05584240 | 0.60145005  | 0.61133939  |
| C  | -1.19200323 | 0.47493561  | -0.45879084 |
| C  | -1.50177688 | 0.73378051  | -1.83218383 |
| C  | -1.64818697 | 0.32424898  | 1.89427739  |
| C  | -0.46951661 | 0.54300441  | -2.78655329 |
| C  | -0.70439393 | 0.77952592  | -4.13471887 |
| C  | -1.96832787 | 1.20904568  | -4.55385357 |
| C  | -3.00218033 | 1.40299741  | -3.62326893 |
| C  | -2.77663220 | 1.16945245  | -2.27653941 |
| N  | -1.31240122 | 0.19716485  | 3.01170441  |
| H  | -1.18393820 | -0.44354084 | 3.82530727  |
| Al | 0.61338552  | -0.92470632 | 6.60130484  |
| H  | -3.09907525 | 0.91449071  | 0.50944470  |
| H  | -0.16734605 | 0.14653007  | -0.24256094 |
| H  | 0.51255185  | 0.20611340  | -2.44210840 |
| H  | 0.09376498  | 0.63127607  | -4.86511429 |
| H  | -2.15486393 | 1.39600972  | -5.61452627 |
| H  | -3.98424195 | 1.73885016  | -3.96292972 |
| H  | -3.59098995 | 1.32641536  | -1.56514907 |
| C  | 2.74441357  | 0.52074080  | 0.39770268  |
| C  | 2.92454078  | -0.08568257 | -0.84999560 |
| C  | 2.49442116  | -1.40071719 | -1.05873942 |
| C  | 1.88338640  | -2.11111554 | -0.02017129 |
| C  | 1.71050829  | -1.50723145 | 1.22959669  |
| C  | 2.14069912  | -0.19178693 | 1.43928921  |
| H  | 3.42213637  | 0.46222378  | -1.65494853 |
| H  | 2.65508080  | -1.88258521 | -2.02707726 |
| H  | 1.56294357  | -3.14416566 | -0.17896278 |
| H  | 1.26279748  | -2.07733000 | 2.04942960  |
| H  | 2.03080000  | 0.27283431  | 2.42382388  |
| H  | 3.09626454  | 1.54217586  | 0.56498833  |
| Cl | 1.48158186  | 0.77050670  | 5.72728107  |
| Cl | -0.95170306 | -1.82103652 | 5.43802086  |
| Cl | 1.13414374  | -1.77387458 | 8.42468197  |

### Structures 32 and 22+C<sub>6</sub>H<sub>6</sub>

37

Energy -3878.688788456 Dipole 15.968506

|   |             |            |             |
|---|-------------|------------|-------------|
| C | -0.87107823 | 0.76393759 | 1.10866376  |
| C | -0.29351252 | 0.07584248 | -0.13281437 |
| C | -0.93032595 | 0.56140029 | -1.42303560 |
| C | -0.40991363 | 0.18237132 | 2.30205283  |

|    |             |             |             |
|----|-------------|-------------|-------------|
| C  | -1.69566890 | -0.32087225 | -2.19741493 |
| C  | -2.30306275 | 0.11913194  | -3.37525559 |
| C  | -2.14436563 | 1.44020724  | -3.79511736 |
| C  | -1.37970966 | 2.32569309  | -3.03032574 |
| C  | -0.77518079 | 1.88596342  | -1.85394959 |
| N  | 0.01380068  | -0.39365864 | 3.22735362  |
| Al | -3.04261393 | 0.50758168  | 1.27347286  |
| H  | -0.79787858 | 1.86363425  | 1.13276468  |
| H  | -0.50210337 | -1.00018834 | -0.01986167 |
| H  | -1.84807383 | -1.34818432 | -1.85500097 |
| H  | -2.91061122 | -0.57527365 | -3.96076085 |
| H  | -2.62035304 | 1.78453059  | -4.71659959 |
| H  | -1.26097582 | 3.36457379  | -3.34713479 |
| H  | -0.19315415 | 2.60078079  | -1.25983342 |
| C  | 1.29501403  | 0.19283284  | -0.28413080 |
| C  | 1.70002692  | -0.74133935 | -1.34738353 |
| C  | 2.62439583  | -1.73321659 | -1.13191017 |
| C  | 3.25665549  | -1.83777888 | 0.12523138  |
| C  | 3.01527157  | -0.90537499 | 1.14740080  |
| C  | 2.08405285  | 0.08975255  | 0.95199579  |
| H  | 1.16838732  | -0.66875515 | -2.30068087 |
| H  | 2.86304446  | -2.44975052 | -1.92105390 |
| H  | 3.95895781  | -2.65672150 | 0.30733991  |
| H  | 3.54300401  | -0.96919182 | 2.10244872  |
| H  | 1.93859094  | 0.83119729  | 1.74194832  |
| H  | 1.40055483  | 1.23518772  | -0.65665763 |
| Al | 1.16256250  | -1.24380320 | 4.57860350  |
| Cl | 2.84024695  | 0.12931946  | 4.58360674  |
| Cl | 0.05751113  | -1.36137776 | 6.38531918  |
| Cl | 1.66894171  | -3.09846467 | 3.60642898  |
| Cl | -3.94025587 | 1.86635720  | -0.12172178 |
| Cl | -3.37779417 | 1.07477535  | 3.31616969  |
| Cl | -3.29438698 | -1.59111927 | 0.83984236  |

37

|                                         |             |             |             |
|-----------------------------------------|-------------|-------------|-------------|
| Energy -3878.738171058 Dipole 12.537524 |             |             |             |
| C                                       | -0.91938145 | 1.37878218  | 1.21845898  |
| C                                       | -0.48054048 | 0.98956955  | -0.01447258 |
| C                                       | -1.10746258 | 1.28853062  | -1.28701612 |
| C                                       | -0.19717174 | 1.06956676  | 2.38052347  |
| C                                       | -0.51748751 | 0.75535272  | -2.45371845 |
| C                                       | -1.07069755 | 1.00615270  | -3.70621120 |
| C                                       | -2.22027257 | 1.79259694  | -3.81530882 |
| C                                       | -2.81650463 | 2.32943715  | -2.66640237 |
| C                                       | -2.26860395 | 2.08283034  | -1.41416468 |
| N                                       | 0.38899743  | 0.83346706  | 3.35819504  |
| Al                                      | -3.10488749 | -1.52385147 | 0.94900589  |
| H                                       | -1.82381262 | 1.97449038  | 1.37251906  |
| H                                       | 0.43857486  | 0.39162701  | -0.05917069 |
| H                                       | 0.37939626  | 0.13647258  | -2.35591142 |
| H                                       | -0.60532339 | 0.58731189  | -4.60146194 |
| H                                       | -2.65607705 | 1.99141019  | -4.79775408 |
| H                                       | -3.71432753 | 2.94562968  | -2.75427725 |
| H                                       | -2.74549633 | 2.51242943  | -0.53013370 |
| C                                       | 3.26055296  | -0.59421153 | -0.48215392 |
| C                                       | 2.69384347  | -1.32309490 | -1.53383782 |
| C                                       | 1.74211201  | -2.31302987 | -1.26567659 |
| C                                       | 1.36161886  | -2.57707161 | 0.05430851  |
| C                                       | 1.93456910  | -1.85494875 | 1.10627199  |
| C                                       | 2.88286951  | -0.86083880 | 0.83808696  |
| H                                       | 3.00526270  | -1.12703052 | -2.56414598 |
| H                                       | 1.30203844  | -2.88773082 | -2.08570944 |
| H                                       | 0.62175204  | -3.35452782 | 0.26486247  |
| H                                       | 1.65074186  | -2.06739428 | 2.14193530  |
| H                                       | 3.32854087  | -0.30151283 | 1.66672075  |
| H                                       | 4.00838681  | 0.17596746  | -0.69115640 |
| Al                                      | 1.47014776  | 0.37050176  | 4.96369646  |
| Cl                                      | 3.42784261  | 0.99393671  | 4.34922279  |
| Cl                                      | 0.54709567  | 1.52591125  | 6.50132458  |
| Cl                                      | 1.19851527  | -1.75317834 | 5.07411971  |

|    |             |             |             |
|----|-------------|-------------|-------------|
| C1 | -4.52057927 | 0.02958704  | 1.12219787  |
| C1 | -2.10594098 | -2.22763807 | 2.65141464  |
| C1 | -2.76829135 | -2.39550178 | -0.93418103 |

### Structures 34, TS 34→33 and 33

31

Energy -634.0682724196 Charge 2 Dipole 8.255698 ZPE 0.252322 G(298.15) 131.05 HoF  
460.09 kcal Edisp -23.92

|   |             |             |             |
|---|-------------|-------------|-------------|
| C | 1.26067691  | -0.05254385 | -0.85190192 |
| C | -0.10887570 | -0.15682073 | -0.65003905 |
| C | -1.10363533 | -0.47602148 | -1.61204533 |
| C | 2.19295310  | 0.26718833  | 0.14212688  |
| C | -2.46306479 | -0.53040240 | -1.18076515 |
| C | -3.47580038 | -0.83683380 | -2.07307121 |
| C | -3.15960006 | -1.09631968 | -3.41569528 |
| C | -1.82656236 | -1.04885446 | -3.86543877 |
| C | -0.80819385 | -0.74373469 | -2.98238858 |
| N | 3.49700450  | 0.35168079  | -0.12998066 |
| H | 3.84347107  | 0.18464504  | -1.07915446 |
| H | 1.66867883  | -0.22800257 | -1.85269519 |
| H | -0.49273812 | 0.02399300  | 0.36464111  |
| H | -2.70175182 | -0.32686054 | -0.13292085 |
| H | -4.51444950 | -0.87736376 | -1.73839671 |
| H | -3.95799227 | -1.33876101 | -4.12244092 |
| H | -1.60043483 | -1.25388221 | -4.91407609 |
| H | 0.22017801  | -0.71139281 | -3.34845616 |
| C | -0.14384419 | 0.79732293  | 3.65895532  |
| C | 0.16751326  | 1.93131200  | 2.87601215  |
| C | 1.05871009  | 1.81722925  | 1.83484719  |
| C | 1.76906049  | 0.53816173  | 1.58961447  |
| C | 1.30316721  | -0.63563874 | 2.36799917  |
| C | 0.40812643  | -0.47713510 | 3.40002088  |
| H | -0.30623294 | 2.89184492  | 3.09595495  |
| H | 1.32630929  | 2.68321784  | 1.22001251  |
| H | 2.71786026  | 0.75739523  | 2.16922594  |
| H | 1.75440943  | -1.61024473 | 2.15336181  |
| H | 0.11611094  | -1.33242995 | 4.01534516  |
| H | -0.84627857 | 0.90856698  | 4.49277689  |
| H | 4.20522489  | 0.58068448  | 0.56857188  |

31

Energy -634.0105754376 Charge 2 Dipole 10.216218 ZPE 0.250115 G(298.15) 129.68 HoF  
496.29 kcal Edisp -24.59

|   |             |             |             |
|---|-------------|-------------|-------------|
| C | 1.60359490  | -0.90309307 | -0.71612079 |
| C | 0.43872097  | -0.02321616 | -0.45138211 |
| C | -0.77235643 | -0.30614688 | -1.18319019 |
| C | 2.81168505  | -0.50598715 | -0.98694805 |
| C | -1.60499865 | 0.79334601  | -1.53459706 |
| C | -2.74531453 | 0.59020366  | -2.29547875 |
| C | -3.09778458 | -0.70968357 | -2.69470206 |
| C | -2.29871782 | -1.80968666 | -2.33850967 |
| C | -1.14810074 | -1.61493996 | -1.59163709 |
| N | 3.97904958  | -0.15676136 | -1.30828370 |
| H | 4.23687427  | 0.03269756  | -2.29455490 |
| H | 1.46306741  | -1.99402886 | -0.78340103 |
| H | 0.68721487  | 1.03368830  | -0.31817087 |
| H | -1.32838791 | 1.80527425  | -1.22437172 |
| H | -3.36964423 | 1.43906505  | -2.58376881 |
| H | -4.00569588 | -0.86895346 | -3.28284444 |
| H | -2.58766059 | -2.81639657 | -2.64817729 |
| H | -0.55233478 | -2.48926444 | -1.31254659 |
| C | 0.06479397  | -0.39933129 | 1.65453749  |
| C | -0.96183984 | 0.57459673  | 1.88299356  |
| C | -0.70795037 | 1.68980348  | 2.65933926  |
| C | 0.56314961  | 1.85766266  | 3.24236699  |
| C | 1.57630803  | 0.89341446  | 3.07142320  |
| C | 1.32722916  | -0.23434103 | 2.30997137  |
| H | -1.94669622 | 0.42777320  | 1.43126962  |
| H | -1.49039897 | 2.43101512  | 2.83838033  |
| H | 0.76157396  | 2.74320283  | 3.85346463  |

|             |                 |             |                  |
|-------------|-----------------|-------------|------------------|
| H           | 2.53515693      | 1.02193468  | 3.57940186       |
| H           | 2.08103582      | -1.02324717 | 2.23573515       |
| H           | -0.24958676     | -1.41754797 | 1.39965011       |
| H           | 4.73801375      | -0.06105239 | -0.60984845      |
| 31          |                 |             |                  |
| Energy      | -634.0215161171 | Charge 2    | Dipole 10.202034 |
|             | ZPE 0.251008    | G(298.15)   | 130.63           |
|             | HoF             |             |                  |
| 489.43 kcal | Edisp -24.25    |             |                  |
| C           | 1.67269241      | -0.85821664 | -0.64495194      |
| C           | 0.55860888      | 0.10295494  | -0.21522304      |
| C           | -0.65316651     | -0.20913829 | -1.07142725      |
| C           | 2.72098324      | -0.54869224 | -1.34023121      |
| C           | -1.11647764     | 0.76116196  | -1.97610736      |
| C           | -2.22498488     | 0.49267584  | -2.77974579      |
| C           | -2.87148957     | -0.74395574 | -2.69178900      |
| C           | -2.41194637     | -1.71659956 | -1.79586443      |
| C           | -1.30683976     | -1.45188179 | -0.98883740      |
| N           | 3.68761005      | -0.26199622 | -2.10162454      |
| H           | 3.57454356      | -0.23359361 | -3.13059232      |
| H           | 1.54587684      | -1.93295846 | -0.44042991      |
| H           | 0.88470015      | 1.13682335  | -0.40674092      |
| H           | -0.61761327     | 1.73279733  | -2.04977623      |
| H           | -2.58640327     | 1.25275459  | -3.47640810      |
| H           | -3.73992367     | -0.95201801 | -3.32163736      |
| H           | -2.91842576     | -2.68194881 | -1.72696396      |
| H           | -0.96853466     | -2.23049996 | -0.29414144      |
| C           | 0.26380385      | -0.00926326 | 1.34507571       |
| C           | -0.94021150     | 0.74171782  | 1.75590658       |
| C           | -0.99481357     | 1.40104858  | 2.96090759       |
| C           | 0.14584960      | 1.43218011  | 3.79038175       |
| C           | 1.35042666      | 0.78342100  | 3.43480347       |
| C           | 1.42693789      | 0.10011524  | 2.24622761       |
| H           | -1.80274230     | 0.72606188  | 1.08196061       |
| H           | -1.90576839     | 1.92015994  | 3.26929979       |
| H           | 0.09976440      | 1.98160754  | 4.73706829       |
| H           | 2.21022202      | 0.83289212  | 4.10752278       |
| H           | 2.35127952      | -0.41898697 | 1.97270511       |
| H           | -0.07115343     | -1.07632659 | 1.48903602       |
| H           | 4.63719546      | -0.07229609 | -1.73840312      |

**Structures 35 and 24+C<sub>6</sub>H<sub>6</sub>**

|        |                 |             |             |
|--------|-----------------|-------------|-------------|
| 37     |                 |             |             |
| Energy | -3878.689946148 | Dipole      | 17.552182   |
| C      | -0.15989169     | -0.64214198 | -1.40084226 |
| C      | 0.40007992      | 0.03649360  | -0.19007558 |
| C      | 1.91998590      | 0.03003980  | -0.22838994 |
| C      | -1.27228167     | -1.35716006 | -1.28876039 |
| C      | 2.61947674      | -0.77105442 | 0.68406127  |
| C      | 4.01518161      | -0.81883357 | 0.65245677  |
| C      | 4.72383763      | -0.06503109 | -0.28511893 |
| C      | 4.03168539      | 0.73135683  | -1.20174599 |
| C      | 2.63668991      | 0.77602846  | -1.17390506 |
| N      | -2.28938693     | -1.99394682 | -1.06739322 |
| Al     | -1.95473018     | -3.68380997 | 0.07202048  |
| H      | 0.37520855      | -0.62564280 | -2.35262353 |
| H      | 0.06489076      | -0.52093674 | 0.69958122  |
| H      | 2.06383133      | -1.37908545 | 1.40447724  |
| H      | 4.54874246      | -1.45607948 | 1.36221874  |
| H      | 5.81579690      | -0.10247037 | -0.30794102 |
| H      | 4.57926887      | 1.31586150  | -1.94531476 |
| H      | 2.10975627      | 1.39514359  | -1.90936460 |
| C      | -0.13931973     | 1.52524122  | 0.03944247  |
| C      | 0.50319656      | 2.12476711  | 1.21749242  |
| C      | -0.22900005     | 2.54499639  | 2.30159325  |
| C      | -1.63720964     | 2.46776074  | 2.26882973  |
| C      | -2.32052078     | 2.01203641  | 1.12767689  |
| C      | -1.60426379     | 1.56645432  | 0.04034128  |
| H      | 1.59525862      | 2.17305902  | 1.23010551  |
| H      | 0.27124900      | 2.93928323  | 3.18905437  |
| H      | -2.20961433     | 2.77148593  | 3.15043062  |

|    |             |             |             |
|----|-------------|-------------|-------------|
| H  | -3.41202387 | 1.96651938  | 1.10984074  |
| H  | -2.13651345 | 1.18658499  | -0.84312786 |
| H  | 0.23820398  | 2.03345924  | -0.87412508 |
| Al | -4.10926463 | -1.23253988 | -1.55800416 |
| Cl | -3.86722103 | -4.45787447 | 0.57273369  |
| Cl | -0.90261719 | -2.79171777 | 1.75767046  |
| Cl | -0.68306202 | -4.86480397 | -1.17683124 |
| Cl | -3.55941187 | 0.48179260  | -2.78162771 |
| Cl | -4.88057295 | -0.57776068 | 0.34088599  |
| Cl | -5.14543460 | -2.73747485 | -2.63572180 |

37

Energy -3878.740883333 Dipole 14.216765

|    |             |             |             |
|----|-------------|-------------|-------------|
| C  | 0.06647174  | -1.69805465 | -1.36107466 |
| C  | 0.68629432  | -0.67888804 | -0.67587567 |
| C  | 2.07630787  | -0.32036506 | -0.74997834 |
| C  | -1.28050229 | -1.91955374 | -1.18904202 |
| C  | 2.51259361  | 0.78538792  | 0.01890189  |
| C  | 3.84572796  | 1.17994977  | -0.01030713 |
| C  | 4.76200918  | 0.48071629  | -0.80143416 |
| C  | 4.34511962  | -0.61797609 | -1.56796409 |
| C  | 3.01717395  | -1.01725153 | -1.54601667 |
| N  | -2.44103846 | -2.12232975 | -1.03527556 |
| Al | -2.97901325 | -3.65534401 | 0.41524519  |
| H  | 0.57742527  | -2.36264801 | -2.06284906 |
| H  | 0.06368111  | -0.06769949 | -0.00945028 |
| H  | 1.78764802  | 1.32693332  | 0.63487042  |
| H  | 4.17441570  | 2.03468923  | 0.58500700  |
| H  | 5.81022910  | 0.78990641  | -0.82421776 |
| H  | 5.06743093  | -1.16007075 | -2.18239721 |
| H  | 2.70595426  | -1.87571518 | -2.14589714 |
| C  | -0.47801515 | 3.28768608  | 1.04167399  |
| C  | 0.25351082  | 2.98612290  | 2.19592059  |
| C  | -0.05134430 | 1.84016473  | 2.93876194  |
| C  | -1.09393549 | 1.00079624  | 2.53261384  |
| C  | -1.83180716 | 1.30817930  | 1.38392073  |
| C  | -1.52021653 | 2.44867136  | 0.63521657  |
| H  | 1.05715785  | 3.65222411  | 2.52347342  |
| H  | 0.51750085  | 1.60652466  | 3.84311131  |
| H  | -1.34216279 | 0.10761203  | 3.11250095  |
| H  | -2.66300599 | 0.66455168  | 1.07942136  |
| H  | -2.09766004 | 2.67872405  | -0.26422304 |
| H  | -0.24172388 | 4.18506856  | 0.46299552  |
| Al | -3.90502220 | -0.95901434 | -2.10366645 |
| Cl | -4.80161999 | -4.41625670 | -0.33575771 |
| Cl | -2.99550224 | -2.46075779 | 2.18158868  |
| Cl | -1.24738722 | -4.89995351 | 0.19676760  |
| Cl | -2.64764208 | 0.65970486  | -2.74781712 |
| Cl | -5.24853777 | -0.47254656 | -0.53508447 |
| Cl | -4.46051534 | -2.31918828 | -3.63366243 |

### Cation 38

22

Energy -462.1711680263 Charge 1 Dipole 2.715640 ZPE 0.177426 G(298) 88.10 HoF

153.00 kcal Edisp -14.75

|   |             |             |             |
|---|-------------|-------------|-------------|
| C | -0.72721319 | 1.77575286  | 0.90775729  |
| C | -1.28880502 | 0.54280415  | 0.39608536  |
| C | -0.61864767 | -0.67692059 | 0.25125222  |
| C | 0.32614443  | 2.42388275  | -0.17409219 |
| C | -1.28925165 | -1.74842885 | -0.42602003 |
| C | -0.63749766 | -2.94224341 | -0.65961925 |
| C | 0.69207571  | -3.10219992 | -0.22717617 |
| C | 1.37038565  | -2.07285958 | 0.44595565  |
| C | 0.72702658  | -0.87485562 | 0.70001980  |
| O | 1.26208993  | 1.77945764  | -0.54305861 |
| H | -0.06759606 | 1.63281458  | 1.78038625  |
| H | -1.49624400 | 2.52556740  | 1.13001977  |
| H | -2.30991906 | 0.59099742  | -0.00238590 |
| H | -2.31838997 | -1.60033440 | -0.76502853 |



|   |             |             |             |
|---|-------------|-------------|-------------|
| H | -1.14489804 | -3.75840869 | -1.17797646 |
| H | 1.20361861  | -4.05178243 | -0.40812281 |
| H | 2.39763970  | -2.22712948 | 0.78210083  |
| H | 1.24262252  | -0.08957183 | 1.25349808  |
| C | -0.00166894 | 3.83693138  | -0.54930881 |
| H | 0.76370338  | 4.22800214  | -1.23193987 |
| H | -0.99702278 | 3.86679946  | -1.02432904 |
| H | -0.05907222 | 4.45668120  | 0.36144777  |

### Dication 5a

23  
 Energy -462.3497151613 Charge 2 Dipole 4.216797 ZPE 0.188158 G(298.15) 93.97 HoF  
 409.47 kcal Edisp -14.76

|   |             |             |             |
|---|-------------|-------------|-------------|
| C | 0.54916721  | 1.58720896  | 0.42985143  |
| C | -0.42993181 | 0.44898802  | 0.43417683  |
| C | -0.16046503 | -0.87944823 | 0.18608633  |
| C | 0.03630224  | 2.91423409  | -0.05816358 |
| C | -1.25251161 | -1.82344291 | 0.36039579  |
| C | -1.04779823 | -3.16880839 | 0.15829614  |
| C | 0.23336351  | -3.62221023 | -0.22216553 |
| C | 1.32091281  | -2.72950800 | -0.40345102 |
| C | 1.13903372  | -1.38214621 | -0.20900771 |
| O | 0.59709778  | 4.00450863  | 0.31656530  |
| H | 1.32826477  | 3.92466212  | 0.98338078  |
| H | 1.43899854  | 1.37214406  | -0.19941575 |
| H | 0.94044628  | 1.69666864  | 1.46604278  |
| H | -1.45383942 | 0.69850761  | 0.74281439  |
| H | -2.23625406 | -1.45031046 | 0.66079594  |
| H | -1.86365821 | -3.88366781 | 0.28999190  |
| H | 0.39460228  | -4.69342655 | -0.38466209 |
| H | 2.29648719  | -3.12248107 | -0.69966423 |
| H | 1.98214059  | -0.70213862 | -0.35351024 |
| C | -1.07024840 | 3.05896300  | -1.00256372 |
| H | -1.11307619 | 2.22022986  | -1.71612069 |
| H | -2.01779380 | 3.02260155  | -0.41648576 |
| H | -1.04536023 | 4.03692837  | -1.50696067 |

### Structure 39

26  
 Energy -2084.797942273 Charge 1 Dipole 9.325169 ZPE 0.184381 G(298) 86.28 Edisp -  
 22.39

|    |             |             |             |
|----|-------------|-------------|-------------|
| C  | 1.83378836  | -0.55627528 | 0.26980888  |
| C  | 0.38762024  | -0.99784892 | 0.30842588  |
| C  | 0.05917800  | -2.39835652 | 0.08104956  |
| C  | 2.15482375  | 0.88493640  | 0.57935205  |
| C  | -1.08371217 | -2.92417374 | 0.72574764  |
| C  | -1.42326215 | -4.26272749 | 0.56858789  |
| C  | -0.63918821 | -5.08795659 | -0.24503610 |
| C  | 0.48792622  | -4.57536643 | -0.90161489 |
| C  | 0.83732963  | -3.24001379 | -0.74427003 |
| O  | 1.31085442  | 1.80380546  | 0.51990139  |
| Al | -0.49351008 | 2.07841907  | -0.03369476 |
| H  | 2.31407712  | -0.78429014 | -0.70167738 |
| H  | 2.38497482  | -1.17670452 | 1.00469627  |
| H  | -0.19072344 | -0.54181930 | 1.12577823  |
| H  | -1.69797606 | -2.27271205 | 1.35452299  |
| H  | -2.30159990 | -4.66659797 | 1.07664566  |
| H  | -0.90904658 | -6.13923205 | -0.37333944 |
| H  | 1.09046213  | -5.22508062 | -1.54001699 |
| H  | 1.71172518  | -2.85344861 | -1.27414274 |
| C  | 3.54344032  | 1.21328669  | 0.99053800  |
| H  | 3.61424576  | 1.04370350  | 2.08406341  |
| H  | 4.28156878  | 0.54838176  | 0.51730932  |
| H  | 3.76711983  | 2.27130414  | 0.79818435  |
| Cl | -0.53748533 | 3.70102631  | -1.34461548 |
| Cl | -1.64383709 | 1.78294637  | 1.70633484  |
| Cl | -0.52070655 | 0.11737009  | -1.23955379 |

*Pre-reaction complex, TS and product of the reaction 38 + C<sub>6</sub>H<sub>6</sub> → 49*

34

Energy -694.1843638953 Charge 1 Dipole 3.395273 ZPE 0.276183 G(298) 141.58 HoF

163.38 kcal

|   |             |             |             |
|---|-------------|-------------|-------------|
| C | 1.59027382  | -0.10548280 | -1.00477545 |
| C | 0.23868295  | -0.26423154 | -0.50523551 |
| C | -0.42657303 | -1.48274693 | -0.30707054 |
| C | 2.66505871  | -0.52601202 | 0.15434211  |
| C | -1.70879914 | -1.45727397 | 0.33067955  |
| C | -2.37165343 | -2.63545595 | 0.61338107  |
| C | -1.77847149 | -3.86364252 | 0.27062111  |
| C | -0.52503934 | -3.91697068 | -0.36037393 |
| C | 0.14549956  | -2.74469440 | -0.66266080 |
| O | 2.68800373  | -1.65191317 | 0.55669882  |
| H | 1.85032237  | -0.80498544 | -1.81583890 |
| H | 1.79246127  | 0.93143543  | -1.30005915 |
| H | -0.27639410 | 0.64645349  | -0.17227923 |
| H | -2.14163248 | -0.48876121 | 0.59634253  |
| H | -3.34827279 | -2.61908565 | 1.10142392  |
| H | -2.30800648 | -4.79502586 | 0.48987989  |
| H | -0.08988811 | -4.88274985 | -0.62492784 |
| H | 1.10652566  | -2.78679894 | -1.17612854 |
| C | 3.56687561  | 0.59595277  | 0.57095597  |
| H | 2.95175742  | 1.43429623  | 0.93886085  |
| H | 4.12399131  | 0.96320005  | -0.30750855 |
| H | 4.26268651  | 0.24986498  | 1.34589367  |
| C | 0.21292888  | 3.28489573  | 0.88409261  |
| C | -0.99493117 | 2.81753563  | 1.41677143  |
| C | -2.07539668 | 2.55224251  | 0.56827407  |
| C | -1.94543745 | 2.74222180  | -0.81259949 |
| C | -0.73694852 | 3.20685140  | -1.34472710 |
| C | 0.34007758  | 3.48380177  | -0.49553217 |
| H | -1.10230034 | 2.68954892  | 2.49720690  |
| H | -3.03170328 | 2.22604463  | 0.98734888  |
| H | -2.79542985 | 2.55358007  | -1.47380888 |
| H | -0.64599147 | 3.38129752  | -2.42014666 |
| H | 1.26937649  | 3.88821511  | -0.90736991 |
| H | 1.04207795  | 3.53243658  | 1.55336976  |

34

Energy -694.1678552274 Charge 1 Dipole 2.092361 ZPE 0.276230 G(298.15) 144.96 HoF

173.74 kcal Edisp -27.48

|   |             |             |             |
|---|-------------|-------------|-------------|
| C | 1.68422572  | 0.08621985  | -0.55242033 |
| C | 0.39516074  | 0.05928170  | 0.23244976  |
| C | -0.06685616 | 1.27251875  | 0.89856634  |
| C | 2.37379328  | -1.29315646 | -0.62268042 |
| C | -0.70280914 | 1.15992519  | 2.15625422  |
| C | -1.07494852 | 2.29765994  | 2.86376304  |
| C | -0.84991871 | 3.56536168  | 2.31371529  |
| C | -0.23785776 | 3.69350881  | 1.05965138  |
| C | 0.15394552  | 2.55924468  | 0.35806510  |
| O | 1.92732875  | -2.24210202 | -0.01012022 |
| H | 2.38082414  | 0.74872341  | -0.00029166 |
| H | 1.60488752  | 0.54086157  | -1.55455814 |
| H | 0.31285890  | -0.86800230 | 0.81736356  |
| H | -0.87573694 | 0.16770305  | 2.58362019  |
| H | -1.54149168 | 2.20174314  | 3.84678901  |
| H | -1.15280887 | 4.45937809  | 2.86450055  |
| H | -0.06376942 | 4.68505534  | 0.63586006  |
| H | 0.63708631  | 2.67137545  | -0.61665747 |
| C | -1.05086151 | -0.43942075 | -1.11565706 |
| C | -2.22992674 | -0.53359861 | -0.30456925 |
| C | -2.79974643 | -1.76100414 | -0.03347009 |
| C | -2.24097805 | -2.92815709 | -0.58967966 |
| C | -1.13201212 | -2.86379036 | -1.44343873 |
| C | -0.56235800 | -1.63405727 | -1.73272393 |
| H | -2.64801515 | 0.37874423  | 0.12766679  |
| H | -3.68442210 | -1.83191819 | 0.60312600  |
| H | -2.68655764 | -3.89972126 | -0.35889944 |
| H | -0.72963795 | -3.77626146 | -1.88766598 |

|             |                |             |                                                   |
|-------------|----------------|-------------|---------------------------------------------------|
| H           | 0.26987053     | -1.57478142 | -2.43779506                                       |
| H           | -0.87461749    | 0.50799435  | -1.63727198                                       |
| C           | 3.62925749     | -1.35112962 | -1.45521926                                       |
| H           | 4.07759250     | -2.35068409 | -1.38814136                                       |
| H           | 3.40427917     | -1.11350114 | -2.50946333                                       |
| H           | 4.35421981     | -0.59401307 | -1.11066790                                       |
| 34          |                |             |                                                   |
| Energy      | -694.174514188 | Charge 1    | Dipole 3.710026 ZPE 0.278397 G(298.15) 146.70 HoF |
| 169.56 kcal | Edisp -27.30   |             |                                                   |
| C           | 1.64160958     | 0.06841667  | -0.45668632                                       |
| C           | 0.27436762     | 0.01650129  | 0.25485443                                        |
| C           | -0.10524097    | 1.35898837  | 0.85455034                                        |
| C           | 2.18775066     | -1.30937687 | -0.77941708                                       |
| C           | -0.18357703    | 1.50395932  | 2.24613181                                        |
| C           | -0.51330555    | 2.73721606  | 2.81549331                                        |
| C           | -0.76762417    | 3.83869101  | 1.99761561                                        |
| C           | -0.69017705    | 3.70505346  | 0.60802162                                        |
| C           | -0.36091537    | 2.47340460  | 0.04108390                                        |
| O           | 1.44198922     | -2.21618163 | -1.15869490                                       |
| H           | 2.35709933     | 0.59247727  | 0.19650433                                        |
| H           | 1.59761597     | 0.65890386  | -1.39245570                                       |
| H           | 0.38294950     | -0.70409059 | 1.08442382                                        |
| H           | 0.01776209     | 0.64527284  | 2.89501636                                        |
| H           | -0.57295752    | 2.83409038  | 3.90218879                                        |
| H           | -1.02666564    | 4.80318247  | 2.44064223                                        |
| H           | -0.88439481    | 4.56541438  | -0.03680089                                       |
| H           | -0.29590490    | 2.39533338  | -1.05029146                                       |
| C           | -0.89586510    | -0.54985700 | -0.65402252                                       |
| C           | -1.99154078    | -1.07338038 | 0.20201629                                        |
| C           | -2.64123808    | -2.23135717 | -0.09212989                                       |
| C           | -2.26539412    | -2.98029755 | -1.24924670                                       |
| C           | -1.22955981    | -2.58919954 | -2.07900052                                       |
| C           | -0.49354993    | -1.43350527 | -1.77848637                                       |
| H           | -2.25909721    | -0.47793087 | 1.08052425                                        |
| H           | -3.45403683    | -2.59458711 | 0.54046118                                        |
| H           | -2.83090670    | -3.88442647 | -1.49479209                                       |
| H           | -0.98193471    | -3.17471105 | -2.96653976                                       |
| H           | 0.13062940     | -0.99510877 | -2.55851905                                       |
| H           | -1.31512073    | 0.35025074  | -1.17122982                                       |
| C           | 3.65469900     | -1.55356033 | -0.60463305                                       |
| H           | 3.93476639     | -2.55067187 | -0.96695767                                       |
| H           | 4.22627467     | -0.77205155 | -1.13473995                                       |
| H           | 3.91149358     | -1.45686207 | 0.46511545                                        |

***Pre-reaction complex, TS and product of the reaction 5a + C<sub>6</sub>H<sub>6</sub> → 50***

|             |                 |             |                                                |
|-------------|-----------------|-------------|------------------------------------------------|
| 35          |                 |             |                                                |
| Energy      | -694.3935639024 | Charge 2    | Dipole 5.838233 ZPE 0.286441 G(298) 149.71 HoF |
| 400.61 kcal | Edisp -26.67    |             |                                                |
| C           | 1.16251240      | 0.33545007  | 0.60849440                                     |
| C           | 0.54860200      | -0.59760096 | -0.38688094                                    |
| C           | 0.15390031      | -1.90906481 | -0.16265848                                    |
| C           | 2.23510896      | 1.19390000  | -0.01903903                                    |
| C           | -0.40656039     | -2.63553208 | -1.28020284                                    |
| C           | -0.79941924     | -3.94813048 | -1.13246018                                    |
| C           | -0.66090596     | -4.57465407 | 0.12180893                                     |
| C           | -0.12494783     | -3.88863143 | 1.23633236                                     |
| C           | 0.28116398      | -2.57964546 | 1.10655932                                     |
| O           | 1.93967626      | 2.28984454  | -0.59088168                                    |
| H           | 0.94175812      | 2.58302500  | -0.53008521                                    |
| H           | 0.34367113      | 1.00832822  | 0.98217295                                     |
| H           | 1.58509458      | -0.19749703 | 1.47327864                                     |
| H           | 0.39521217      | -0.19838232 | -1.39762241                                    |
| H           | -0.50579963     | -2.13224629 | -2.24630452                                    |
| H           | -1.21429104     | -4.50280470 | -1.97724300                                    |
| H           | -0.97340310     | -5.61733403 | 0.23772075                                     |
| H           | -0.03248381     | -4.40497023 | 2.19457488                                     |
| H           | 0.69493982      | -2.05870265 | 1.97286649                                     |
| C           | 3.64828801      | 0.80607328  | 0.01682395                                     |

|   |             |             |             |
|---|-------------|-------------|-------------|
| H | 4.26170849  | 1.42715561  | -0.64984416 |
| H | 3.77225575  | -0.27130260 | -0.18690690 |
| H | 4.00541326  | 0.94865233  | 1.06080345  |
| C | -2.29388560 | 1.44260034  | 0.66668989  |
| C | -1.60738863 | 2.34303408  | 1.49013509  |
| C | -0.81326637 | 3.34998439  | 0.91637852  |
| C | -0.69435954 | 3.44044449  | -0.48622822 |
| C | -1.37771239 | 2.52577711  | -1.30633373 |
| C | -2.17078468 | 1.52369755  | -0.72657913 |
| H | -1.73404763 | 2.30387504  | 2.57553530  |
| H | -0.32384865 | 4.09170385  | 1.55466973  |
| H | -0.18030592 | 4.29937253  | -0.93507459 |
| H | -1.33133208 | 2.63009257  | -2.39429240 |
| H | -2.74683911 | 0.84963535  | -1.36638232 |
| H | -2.95588574 | 0.69541020  | 1.11291093  |

35

Energy -694.3773304318 Charge 2 Dipole 4.777340 ZPE 0.288453 G(298.15) 153.02 HoF  
410.80 kcal Edisp -28.33

|   |             |             |             |
|---|-------------|-------------|-------------|
| C | 1.19551064  | 0.58665190  | 0.26499628  |
| C | 0.06387539  | -0.20757139 | -0.46229517 |
| C | -0.22734347 | -1.56058748 | 0.02126041  |
| C | 2.21504746  | 1.06073394  | -0.71580216 |
| C | -0.63828708 | -2.52931752 | -0.92965845 |
| C | -0.89204152 | -3.83750340 | -0.53660499 |
| C | -0.76686475 | -4.19598452 | 0.81213351  |
| C | -0.37725296 | -3.24279692 | 1.76884363  |
| C | -0.11681395 | -1.93525976 | 1.38133686  |
| O | 2.04866307  | 2.17249870  | -1.34444627 |
| H | 1.21358829  | 2.64828083  | -1.07712039 |
| H | 0.79255429  | 1.45158928  | 0.82273056  |
| H | 1.68956483  | -0.07978763 | 0.98680083  |
| H | 0.17897450  | -0.20199651 | -1.55554014 |
| H | -0.73729183 | -2.25462912 | -1.98504914 |
| H | -1.18708236 | -4.58341100 | -1.27817551 |
| H | -0.97840868 | -5.22200036 | 1.12457461  |
| H | -0.28278185 | -3.53180629 | 2.81804047  |
| H | 0.17449183  | -1.20744415 | 2.14528192  |
| C | 3.43053034  | 0.31180655  | -1.02441414 |
| H | 3.94914505  | 0.69425496  | -1.91372608 |
| H | 3.21886391  | -0.77026149 | -1.09015337 |
| H | 4.10725530  | 0.41170639  | -0.14556494 |
| C | -1.50971845 | 0.84363639  | -0.42750069 |
| C | -1.82642056 | 1.04764809  | 0.96730473  |
| C | -1.70156510 | 2.29559593  | 1.54982653  |
| C | -1.31297422 | 3.39687250  | 0.76184260  |
| C | -1.07912583 | 3.25961793  | -0.62817460 |
| C | -1.22010585 | 2.01927109  | -1.22430754 |
| H | -2.14361260 | 0.18660262  | 1.56367172  |
| H | -1.93271632 | 2.44110390  | 2.60832183  |
| H | -1.22516679 | 4.38529964  | 1.22469539  |
| H | -0.88017105 | 4.15169615  | -1.23172704 |
| H | -1.12889244 | 1.91292430  | -2.31124714 |
| H | -2.11342726 | 0.08256646  | -0.94015409 |

35

Energy -694.3990399174 Charge 2 Dipole 5.387414 ZPE 0.288564 G(298.15) 153.09 HoF  
397.17 kcal Edisp -28.06

|   |             |             |             |
|---|-------------|-------------|-------------|
| C | 1.60832256  | -0.63951451 | -0.39201960 |
| C | 0.38928178  | 0.26400140  | -0.06646545 |
| C | -0.91055620 | -0.27257301 | -0.65603340 |
| C | 1.82737465  | -0.99106694 | -1.83604469 |
| C | -1.64401184 | 0.51763788  | -1.56931099 |
| C | -2.83349391 | 0.03528373  | -2.12719051 |
| C | -3.31086176 | -1.22737167 | -1.76977968 |
| C | -2.59893909 | -2.01513091 | -0.85613417 |
| C | -1.41000618 | -1.54373013 | -0.30061753 |
| O | 0.88130006  | -0.98205758 | -2.69231500 |
| H | -0.00920510 | -0.69681657 | -2.27893555 |
| H | 1.52525218  | -1.62763247 | 0.11175067  |
| H | 2.55925433  | -0.21070473 | -0.03432371 |

|   |             |             |             |
|---|-------------|-------------|-------------|
| H | 0.58360019  | 1.25911673  | -0.50306999 |
| H | -1.28389644 | 1.51494397  | -1.84526209 |
| H | -3.38774321 | 0.65372242  | -2.83737001 |
| H | -4.24295890 | -1.60136110 | -2.20068310 |
| H | -2.97553759 | -3.00173588 | -0.57550676 |
| H | -0.87586513 | -2.18006903 | 0.41453498  |
| C | 0.24660992  | 0.51654017  | 1.50736204  |
| C | -0.98913268 | 1.24500015  | 1.86337524  |
| C | -1.01090187 | 2.19144799  | 2.85976533  |
| C | 0.18739342  | 2.53331759  | 3.52020667  |
| C | 1.41539420  | 1.90625821  | 3.21182726  |
| C | 1.46108986  | 0.94276590  | 2.23417317  |
| H | -1.90546885 | 0.98596303  | 1.32415382  |
| H | -1.94286332 | 2.69502073  | 3.12843402  |
| H | 0.16655512  | 3.30657719  | 4.29605072  |
| H | 2.31961932  | 2.18989560  | 3.75621599  |
| H | 2.40919316  | 0.43687257  | 2.03146769  |
| H | 0.04738083  | -0.50727622 | 1.93599756  |
| C | 3.15698554  | -1.38020314 | -2.32348437 |
| H | 3.73860202  | -0.44687376 | -2.48457899 |
| H | 3.71223682  | -1.95522919 | -1.56479127 |
| H | 3.09599613  | -1.91501841 | -3.28139831 |

*Pre-reaction complex, TS and product of the reaction 39 + C<sub>6</sub>H<sub>6</sub> → 51*

38

Energy -2316.812185559 Charge 1 Dipole 7.987037 ZPE 0.282763 G(298) 140.65

|    |             |             |             |
|----|-------------|-------------|-------------|
| C  | 0.37960388  | 0.47474499  | -1.35466552 |
| C  | -0.63581526 | 0.59835463  | -0.25392867 |
| C  | -1.50194307 | 1.76266259  | -0.17484758 |
| C  | 1.16600474  | -0.79876749 | -1.49377684 |
| C  | -1.99475857 | 2.13713692  | 1.09699989  |
| C  | -2.80691625 | 3.25568366  | 1.23481928  |
| C  | -3.15160626 | 4.00799848  | 0.10559503  |
| C  | -2.68246503 | 3.64073553  | -1.16245456 |
| C  | -1.86631022 | 2.52540556  | -1.30650283 |
| O  | 0.96547454  | -1.81977991 | -0.79883094 |
| Al | -0.41066338 | -2.55298524 | 0.28765543  |
| H  | -0.02499159 | 0.72726276  | -2.35099817 |
| H  | 1.14152201  | 1.26940282  | -1.15209630 |
| H  | -0.27374353 | 0.24556552  | 0.72165720  |
| H  | -1.73103572 | 1.53819759  | 1.97366058  |
| H  | -3.17934402 | 3.54319447  | 2.22045398  |
| H  | -3.79576551 | 4.88448557  | 0.21219843  |
| H  | -2.96247007 | 4.22836249  | -2.03942103 |
| H  | -1.52170364 | 2.24541984  | -2.30480076 |
| C  | 2.20367836  | -0.85722542 | -2.55756354 |
| H  | 2.64654322  | 0.12624117  | -2.76370698 |
| H  | 1.69795517  | -1.20361708 | -3.48127257 |
| H  | 2.96946912  | -1.60356930 | -2.30623546 |
| Cl | -0.80210667 | -4.49176303 | -0.38746119 |
| Cl | 0.04381793  | -1.99833190 | 2.27506387  |
| Cl | -1.96065945 | -1.09661237 | -0.54925922 |
| C  | 2.83310788  | 3.02282957  | -0.35033834 |
| C  | 3.73047330  | 1.98518701  | -0.63329209 |
| C  | 3.80808105  | 0.87543126  | 0.21640155  |
| C  | 2.99302967  | 0.80470199  | 1.35166798  |
| C  | 2.10682735  | 1.84850663  | 1.64208751  |
| C  | 2.02474428  | 2.95609206  | 0.79167073  |
| H  | 4.39188820  | 2.05834303  | -1.50145032 |
| H  | 4.52854268  | 0.07838768  | 0.01192045  |
| H  | 3.06789118  | -0.05204875 | 2.02682556  |
| H  | 1.49911064  | 1.80900282  | 2.55053369  |
| H  | 1.34599714  | 3.77981322  | 1.02798997  |
| H  | 2.78875452  | 3.90022422  | -1.00130783 |

38

Energy -2316.797203149 Charge 1 Dipole 8.395606 ZPE 0.282424 G(298.15) 142.40 Edisp -36.42

|   |             |             |             |
|---|-------------|-------------|-------------|
| C | 0.61652561  | -1.29719302 | -0.73482172 |
| C | -0.44566944 | -0.28412622 | -0.38307142 |

|    |             |             |             |
|----|-------------|-------------|-------------|
| C  | -1.83472395 | -0.57529489 | -0.64511068 |
| C  | 1.99981306  | -0.72536229 | -0.96785469 |
| C  | -2.70429770 | 0.49702359  | -0.97099394 |
| C  | -4.02498245 | 0.25171119  | -1.32156999 |
| C  | -4.51346942 | -1.06165308 | -1.32107036 |
| C  | -3.67374084 | -2.13309398 | -0.98243084 |
| C  | -2.34700545 | -1.89678253 | -0.65013044 |
| O  | 2.14033208  | 0.50909134  | -0.91415612 |
| Al | 3.71024877  | 1.71370907  | -1.01951535 |
| H  | 0.32603479  | -1.76852044 | -1.69852456 |
| H  | 0.69068111  | -2.14915087 | -0.03633825 |
| H  | -0.12865596 | 0.75160677  | -0.54746680 |
| H  | -2.31669185 | 1.52008506  | -0.97238786 |
| H  | -4.68122420 | 1.08025756  | -1.59692881 |
| H  | -5.55655087 | -1.25326048 | -1.58542422 |
| H  | -4.06398257 | -3.15316189 | -0.98376918 |
| H  | -1.70283081 | -2.74060308 | -0.38843617 |
| C  | -0.29069964 | -0.08027416 | 1.79083896  |
| C  | -1.13807661 | 1.05458668  | 1.97733011  |
| C  | -0.59538535 | 2.29053970  | 2.27772370  |
| C  | 0.79679946  | 2.42274139  | 2.43196428  |
| C  | 1.64438381  | 1.30943925  | 2.32567151  |
| C  | 1.10700987  | 0.06631788  | 2.03336497  |
| H  | -2.21765256 | 0.93952938  | 1.85281843  |
| H  | -1.24105890 | 3.16309207  | 2.39933134  |
| H  | 1.22734303  | 3.40501329  | 2.64315615  |
| H  | 2.72196379  | 1.42480474  | 2.46452253  |
| H  | 1.76118308  | -0.80961366 | 1.99458825  |
| H  | -0.73328735 | -1.07784304 | 1.87221012  |
| C  | 3.11883145  | -1.64706988 | -1.27606426 |
| H  | 3.90397793  | -1.50553559 | -0.50675126 |
| H  | 2.81389245  | -2.69946462 | -1.33170531 |
| H  | 3.59277546  | -1.32092209 | -2.22181709 |
| Cl | 2.76200417  | 3.56138673  | -0.55248954 |
| Cl | 4.90466403  | 0.86485111  | 0.55404279  |
| Cl | 4.37152196  | 1.35313903  | -3.00873427 |

38

Energy -2316.815939997 Charge 1 Dipole 4.287586 ZPE 0.282829 G(298.15) 143.03 Edisp  
-36.28

|    |             |             |             |
|----|-------------|-------------|-------------|
| C  | -0.18015497 | -0.90124095 | -1.46570784 |
| C  | 0.56036600  | 0.15947495  | -0.57989810 |
| C  | 0.19927046  | 1.59235030  | -0.97886519 |
| C  | 0.44503466  | -2.26333771 | -1.35000498 |
| C  | 1.17545346  | 2.58840275  | -0.82915666 |
| C  | 0.88501831  | 3.91853018  | -1.13942383 |
| C  | -0.38657314 | 4.26818243  | -1.59725641 |
| C  | -1.36426119 | 3.28160000  | -1.74944765 |
| C  | -1.07569026 | 1.94947957  | -1.44020707 |
| O  | -0.00168517 | -3.13899535 | -0.58153030 |
| Al | -1.41259869 | -3.73945820 | 0.57898026  |
| H  | -0.08481404 | -0.55844653 | -2.50905393 |
| H  | -1.24559308 | -0.97059477 | -1.20077580 |
| H  | 1.64448901  | 0.04132082  | -0.75458797 |
| H  | 2.17594156  | 2.32360350  | -0.47275186 |
| H  | 1.65789550  | 4.68235403  | -1.02576260 |
| H  | -0.61488668 | 5.30780506  | -1.84333448 |
| H  | -2.35676093 | 3.54611124  | -2.12220517 |
| H  | -1.85403614 | 1.19507496  | -1.58831517 |
| C  | 0.34069281  | -0.02085946 | 0.91209395  |
| C  | -0.97465189 | 0.20678016  | 1.51092347  |
| C  | -1.08647888 | 0.20856557  | 2.96029857  |
| C  | -0.01581559 | -0.13336234 | 3.75438768  |
| C  | 1.21328766  | -0.43170686 | 3.14005326  |
| C  | 1.39042715  | -0.36942031 | 1.74806267  |
| H  | -1.57082258 | 0.99134232  | 1.00810455  |
| H  | -2.06248062 | 0.43450991  | 3.39941053  |
| H  | -0.11022414 | -0.17108410 | 4.84131198  |
| H  | 2.06581589  | -0.71233467 | 3.76609102  |
| H  | 2.38030572  | -0.57495139 | 1.33138881  |

|    |             |             |             |
|----|-------------|-------------|-------------|
| H  | -1.64658294 | -0.71482289 | 1.20740118  |
| C  | 1.62768539  | -2.59284966 | -2.19319506 |
| H  | 2.20057048  | -3.42663847 | -1.76577691 |
| H  | 1.23685815  | -2.92042390 | -3.17766607 |
| H  | 2.26103368  | -1.71426453 | -2.38650321 |
| Cl | -2.92528553 | -2.13500376 | 0.45554776  |
| Cl | -0.43560976 | -3.68163070 | 2.46777797  |
| Cl | -2.05513967 | -5.52406119 | -0.33040742 |

### Structures 46 and 36+C<sub>6</sub>H<sub>6</sub>

34  
 Energy -694.1585726815 Charge 1 Dipole 5.660481 HoF 179.57

|   |             |             |             |
|---|-------------|-------------|-------------|
| C | 1.36578272  | -0.98704805 | -0.62792679 |
| C | 0.27616564  | -0.08178501 | -0.19589247 |
| C | -1.01269239 | -0.33440007 | -0.97374377 |
| C | 2.59988602  | -0.62071416 | -1.07070453 |
| C | -1.56180090 | 0.69844639  | -1.74457995 |
| C | -2.73035078 | 0.48760914  | -2.48101850 |
| C | -3.36584555 | -0.75465307 | -2.44576322 |
| C | -2.82644837 | -1.78879181 | -1.67536350 |
| C | -1.65632781 | -1.57917084 | -0.94387024 |
| O | 3.40836682  | -1.62222087 | -1.49763285 |
| H | 1.14815029  | -2.06053209 | -0.65987914 |
| H | 0.56336911  | 0.97008030  | -0.34920525 |
| H | -1.06928004 | 1.67543420  | -1.77946009 |
| H | -3.14321892 | 1.29937665  | -3.08487177 |
| H | -4.28109769 | -0.91959282 | -3.01914724 |
| H | -3.31604750 | -2.76514941 | -1.64762414 |
| H | -1.24526675 | -2.40831807 | -0.35679150 |
| C | -0.03234683 | -0.21189231 | 1.36868164  |
| C | -1.22005101 | 0.54088698  | 1.79217851  |
| C | -1.18961880 | 1.40899975  | 2.86063966  |
| C | -0.00524547 | 1.55929103  | 3.60493448  |
| C | 1.16107310  | 0.83315677  | 3.28351781  |
| C | 1.16021918  | -0.00784210 | 2.19722263  |
| H | -2.14019828 | 0.39484553  | 1.21968356  |
| H | -2.08240740 | 1.97244447  | 3.14128008  |
| H | 0.01531545  | 2.25979535  | 4.44512754  |
| H | 2.06455137  | 0.96683427  | 3.88280270  |
| H | 2.07359579  | -0.52956458 | 1.89419910  |
| H | -0.30792916 | -1.29259175 | 1.42090747  |
| C | 3.15781577  | 0.76605683  | -1.15281519 |
| H | 4.12447927  | 0.82090385  | -0.62248851 |
| H | 3.33883816  | 1.04245078  | -2.20654137 |
| H | 2.48849667  | 1.52160807  | -0.72156821 |
| H | 4.24006829  | -1.25395334 | -1.85428695 |

34  
 Energy -694.218080889 Charge 1 Dipole 3.559709 HoF 142.22

|   |             |             |             |
|---|-------------|-------------|-------------|
| C | -0.47228542 | -0.83827857 | -0.72298616 |
| C | -1.13730432 | -0.10354214 | -1.68059893 |
| C | -1.89727902 | -0.60620846 | -2.78505674 |
| C | 0.26138475  | -0.27371040 | 0.33758443  |
| C | -2.50697462 | 0.33343908  | -3.65740183 |
| C | -3.25662911 | -0.09188651 | -4.74519644 |
| C | -3.41291573 | -1.46232538 | -4.98450086 |
| C | -2.81801489 | -2.40823660 | -4.13411847 |
| C | -2.06835638 | -1.99131498 | -3.04634613 |
| O | 0.82436810  | -1.14603768 | 1.14182098  |
| H | -0.48343049 | -1.93136599 | -0.74480624 |
| H | -1.09562381 | 0.98942103  | -1.61229828 |
| H | -2.38002327 | 1.40245493  | -3.46370411 |
| H | -3.72206481 | 0.63799871  | -5.41083583 |
| H | -4.00276187 | -1.80030165 | -5.84040854 |
| H | -2.94737409 | -3.47448948 | -4.33184745 |
| H | -1.61118285 | -2.73768770 | -2.39332438 |
| C | 1.80678835  | -0.30628351 | 4.04001031  |
| C | 1.27063501  | 0.94412279  | 4.37904877  |
| C | 1.90345255  | 2.11359870  | 3.94932292  |
| C | 3.06695220  | 2.04002245  | 3.17353056  |

|   |             |             |             |
|---|-------------|-------------|-------------|
| C | 3.60065760  | 0.79645143  | 2.82683232  |
| C | 2.97337022  | -0.38041991 | 3.26269663  |
| H | 0.37606376  | 1.00202755  | 5.00465422  |
| H | 1.50026512  | 3.08856419  | 4.23584409  |
| H | 3.56988171  | 2.95740744  | 2.85634700  |
| H | 4.52278702  | 0.73792722  | 2.24261040  |
| H | 3.42059242  | -1.35361211 | 3.03798739  |
| H | 1.33975733  | -1.22180113 | 4.41481130  |
| C | 0.45549122  | 1.17252379  | 0.61725623  |
| H | 0.14333119  | 1.39233808  | 1.65329918  |
| H | 1.53186882  | 1.41281646  | 0.55965513  |
| H | -0.09294256 | 1.82544287  | -0.07005949 |
| H | 1.33751589  | -0.71905456 | 1.89017799  |

### Structures 47 and 37+C<sub>6</sub>H<sub>6</sub>

37

| Energy -2316.419914718 Dipole 17.343445 |             |             |             |
|-----------------------------------------|-------------|-------------|-------------|
| C                                       | -0.88921354 | -0.97940700 | -0.17898169 |
| C                                       | -0.12802066 | 0.22371337  | 0.15780439  |
| C                                       | -0.87353021 | 1.09207904  | 1.16755293  |
| C                                       | -0.99711954 | -1.56827365 | -1.43804119 |
| C                                       | -1.25597196 | 2.39112279  | 0.81026194  |
| C                                       | -1.94377882 | 3.20424060  | 1.71473253  |
| C                                       | -2.25246450 | 2.72916981  | 2.99048940  |
| C                                       | -1.87493794 | 1.43395849  | 3.35511467  |
| C                                       | -1.19173057 | 0.62151086  | 2.44862412  |
| O                                       | -1.71150211 | -2.64850601 | -1.53965577 |
| H                                       | -1.39783002 | -1.51377000 | 0.63052666  |
| H                                       | 0.05896134  | 0.82798248  | -0.74241735 |
| H                                       | -1.02098258 | 2.76845613  | -0.18981725 |
| H                                       | -2.24142498 | 4.21293181  | 1.41688248  |
| H                                       | -2.79141401 | 3.36355765  | 3.69849213  |
| H                                       | -2.11977824 | 1.05014750  | 4.34875320  |
| H                                       | -0.91789909 | -0.39605369 | 2.74790738  |
| C                                       | 1.32982247  | -0.08208116 | 0.74191319  |
| C                                       | 2.01672823  | 1.14487108  | 1.17500207  |
| C                                       | 3.21370575  | 1.54917707  | 0.62504920  |
| C                                       | 3.88269700  | 0.72787845  | -0.29907990 |
| C                                       | 3.33968409  | -0.52217900 | -0.66630327 |
| C                                       | 2.11652176  | -0.91331245 | -0.18135483 |
| H                                       | 1.52254096  | 1.76172360  | 1.92961614  |
| H                                       | 3.66354755  | 2.49701103  | 0.93138808  |
| H                                       | 4.82844020  | 1.05779677  | -0.73671473 |
| H                                       | 3.87829897  | -1.16303719 | -1.36865075 |
| H                                       | 1.65910646  | -1.84314014 | -0.53383985 |
| H                                       | 1.05390234  | -0.66788639 | 1.64236083  |
| C                                       | -0.32779263 | -1.03652286 | -2.67114202 |
| H                                       | 0.32199674  | -1.82749724 | -3.08888611 |
| H                                       | -1.09610540 | -0.84603530 | -3.44187116 |
| H                                       | 0.25726897  | -0.12333025 | -2.50187764 |
| Al                                      | -1.98936084 | -3.85989656 | -2.91943288 |
| Cl                                      | -2.89304162 | -2.73925303 | -4.53338673 |
| Cl                                      | -3.24207110 | -5.38141198 | -2.08734096 |
| Cl                                      | 0.01274754  | -4.54573463 | -3.41367728 |

37

| Energy -2316.493795399 Dipole 12.651383 |             |             |             |
|-----------------------------------------|-------------|-------------|-------------|
| C                                       | -1.57731600 | -0.68229330 | -0.28493685 |
| C                                       | -1.20828697 | 0.59366159  | 0.00937107  |
| C                                       | -1.60701195 | 1.37558930  | 1.16456618  |
| C                                       | -1.12312532 | -1.42286349 | -1.43583568 |
| C                                       | -1.04274577 | 2.65923379  | 1.33168758  |
| C                                       | -1.38527798 | 3.45477858  | 2.42138945  |
| C                                       | -2.30207473 | 2.98364772  | 3.36506212  |
| C                                       | -2.87417641 | 1.71368097  | 3.21356842  |
| C                                       | -2.53258357 | 0.91638705  | 2.12817445  |
| O                                       | -1.46808667 | -2.64470482 | -1.48261645 |
| H                                       | -2.22841256 | -1.25757132 | 0.37988275  |
| H                                       | -0.51663560 | 1.10330960  | -0.67009176 |
| H                                       | -0.32311604 | 3.02203060  | 0.59191926  |



|    |             |             |             |
|----|-------------|-------------|-------------|
| H  | -0.93878109 | 4.44527306  | 2.53651324  |
| H  | -2.57501177 | 3.60595596  | 4.22111351  |
| H  | -3.59325124 | 1.34808899  | 3.95055988  |
| H  | -2.99079298 | -0.06947562 | 2.02112714  |
| C  | 2.32876268  | -0.76658022 | 1.00295307  |
| C  | 2.55348731  | 0.60854719  | 1.12062929  |
| C  | 3.13893376  | 1.31384788  | 0.06453815  |
| C  | 3.50263051  | 0.64281503  | -1.10741717 |
| C  | 3.27974332  | -0.73252832 | -1.22270702 |
| C  | 2.69062210  | -1.43796168 | -0.16859918 |
| H  | 2.27620967  | 1.13056993  | 2.04071929  |
| H  | 3.32390779  | 2.38771274  | 0.15905048  |
| H  | 3.96843150  | 1.19213825  | -1.93030011 |
| H  | 3.56658882  | -1.26121138 | -2.13606915 |
| H  | 2.51007556  | -2.51197930 | -0.26790300 |
| H  | 1.87292255  | -1.31885041 | 1.82921352  |
| C  | -0.30753537 | -0.84033435 | -2.53884368 |
| H  | 0.61608191  | -1.43668660 | -2.63975799 |
| H  | -0.86556561 | -0.98137068 | -3.48245148 |
| H  | -0.05627354 | 0.21655050  | -2.40052522 |
| Al | -1.11185287 | -4.06654867 | -2.70054911 |
| Cl | -1.90567642 | -3.34784232 | -4.56882540 |
| Cl | -2.13763478 | -5.72568588 | -1.84083139 |
| Cl | 1.04282776  | -4.20933037 | -2.67377822 |

### Structures **48** and **14**+C<sub>6</sub>H<sub>6</sub>

33

Energy -693.7252000231 Dipole 2.795095 HoF 83.00

|   |             |             |             |
|---|-------------|-------------|-------------|
| C | -1.09973172 | -1.92873880 | -1.07996991 |
| C | -0.29979684 | -0.85958427 | -0.93627198 |
| C | -0.20347576 | 0.10050467  | 0.23184225  |
| C | -1.03771394 | -2.74276476 | -2.33202393 |
| C | -0.47878890 | 1.46649956  | -0.28273882 |
| C | -1.13032866 | 2.40263348  | 0.48950443  |
| C | -1.68029505 | 2.05188663  | 1.73309895  |
| C | -1.72790709 | 0.68751187  | 2.10921669  |
| C | -1.10813221 | -0.26536072 | 1.34737182  |
| O | -0.26735849 | -2.49491660 | -3.24682061 |
| H | -1.82444824 | -2.22246273 | -0.31524682 |
| H | 0.35699295  | -0.63521214 | -1.78735296 |
| H | -0.06908568 | 1.73885881  | -1.25782206 |
| H | -1.22656691 | 3.42930032  | 0.12457945  |
| H | -2.15356618 | 2.81076133  | 2.36064652  |
| H | -2.28960041 | 0.39494415  | 3.00169111  |
| H | -1.13256611 | -1.31690973 | 1.65074485  |
| C | 1.29663657  | -0.01780719 | 0.77559338  |
| C | 1.53994089  | 0.93310413  | 1.88096104  |
| C | 2.10805546  | 2.15416354  | 1.62133956  |
| C | 2.62685018  | 2.43931922  | 0.33761077  |
| C | 2.81127514  | 1.38404411  | -0.58188066 |
| C | 2.27759539  | 0.14526165  | -0.31901571 |
| H | 1.12857583  | 0.70793167  | 2.86722749  |
| H | 2.17122013  | 2.91066229  | 2.40862627  |
| H | 3.01041779  | 3.43749444  | 0.11146345  |
| H | 3.42045126  | 1.54685091  | -1.47621197 |
| H | 2.46476765  | -0.69514822 | -0.99141644 |
| H | 1.29564016  | -1.05989942 | 1.13410808  |
| C | -2.00987189 | -3.91072476 | -2.39229761 |
| H | -1.88741161 | -4.44963031 | -3.34108090 |
| H | -1.83458709 | -4.59679149 | -1.54591741 |
| H | -3.04718663 | -3.54578163 | -2.29955832 |

33

Energy -693.8453558407 Dipole 3.037672 HoF 7.61

|   |             |             |             |
|---|-------------|-------------|-------------|
| C | -1.39713053 | -1.99136324 | -0.87362132 |
| C | -0.94297038 | -0.84271395 | -0.32509961 |
| C | -1.69838366 | 0.21944993  | 0.32646551  |
| C | -0.45509918 | -2.95694447 | -1.49789207 |
| C | -0.99233520 | 1.33438535  | 0.82520398  |
| C | -1.66147793 | 2.38103060  | 1.45776762  |

|   |             |             |             |
|---|-------------|-------------|-------------|
| C | -3.04966671 | 2.33624696  | 1.60565143  |
| C | -3.76561381 | 1.23645057  | 1.11602836  |
| C | -3.10018796 | 0.19099105  | 0.48468791  |
| O | 0.75511300  | -2.77581179 | -1.54863156 |
| H | -2.46093801 | -2.25149984 | -0.88035181 |
| H | 0.14276158  | -0.69008288 | -0.37833619 |
| H | 0.09541556  | 1.36836209  | 0.70872425  |
| H | -1.09613915 | 3.23604143  | 1.83722161  |
| H | -3.57684828 | 3.15574433  | 2.10116080  |
| H | -4.85216001 | 1.19840835  | 1.23040984  |
| H | -3.67199289 | -0.66096162 | 0.10777867  |
| C | 3.05233981  | -0.05900793 | 0.97677857  |
| C | 3.31173922  | 1.17689738  | 1.57652644  |
| C | 3.31327313  | 2.34214541  | 0.80367885  |
| C | 3.05724913  | 2.26976224  | -0.56903248 |
| C | 2.79800191  | 1.03305698  | -1.16711338 |
| C | 2.79492636  | -0.13410570 | -0.39610136 |
| H | 3.51374649  | 1.23269169  | 2.64982096  |
| H | 3.51755404  | 3.30901782  | 1.27198428  |
| H | 3.06003628  | 3.18058098  | -1.17422476 |
| H | 2.59421043  | 0.97608876  | -2.23986994 |
| H | 2.56719501  | -1.09793369 | -0.86067779 |
| H | 3.04738849  | -0.97007243 | 1.58140046  |
| C | -1.09703541 | -4.20679135 | -2.08139150 |
| H | -0.32402998 | -4.85376718 | -2.51658078 |
| H | -1.64564362 | -4.75537008 | -1.29673263 |
| H | -1.83329771 | -3.93092574 | -2.85563235 |

### Structure 40 and benzene loss product

37

|                                         |             |             |             |
|-----------------------------------------|-------------|-------------|-------------|
| Energy -2316.382723939 Dipole 13.947626 |             |             |             |
| C                                       | -0.58774601 | 0.64901042  | 1.44620535  |
| C                                       | -0.10924659 | 0.01046836  | 0.17065102  |
| C                                       | -0.83505102 | 0.53969578  | -1.06387886 |
| C                                       | -0.02029913 | 0.12822895  | 2.73833732  |
| C                                       | -1.59236747 | -0.33033853 | -1.85842656 |
| C                                       | -2.25504095 | 0.14360526  | -2.99344323 |
| C                                       | -2.15896323 | 1.48827567  | -3.35313159 |
| C                                       | -1.40302180 | 2.36196171  | -2.56755557 |
| C                                       | -0.74725157 | 1.88837739  | -1.43157382 |
| O                                       | 0.48308115  | 0.90277752  | 3.54202395  |
| Al                                      | -2.71546774 | 0.39253413  | 1.69390944  |
| H                                       | -0.48915312 | 1.74946306  | 1.44255999  |
| H                                       | -0.27306360 | -1.07803308 | 0.22977285  |
| H                                       | -1.68966651 | -1.37967604 | -1.56864777 |
| H                                       | -2.85419360 | -0.54543398 | -3.59414139 |
| H                                       | -2.67870558 | 1.85903047  | -4.24020141 |
| H                                       | -1.33466560 | 3.42009503  | -2.83192834 |
| H                                       | -0.18028480 | 2.59503568  | -0.81427410 |
| C                                       | 1.45216456  | 0.18772962  | -0.13030356 |
| C                                       | 1.79733602  | -0.56621528 | -1.34664894 |
| C                                       | 2.77697380  | -1.53227291 | -1.36392347 |
| C                                       | 3.55214456  | -1.77139368 | -0.21423102 |
| C                                       | 3.36079390  | -1.00182581 | 0.94915103  |
| C                                       | 2.37164167  | -0.04608620 | 0.99341322  |
| H                                       | 1.19000053  | -0.38026317 | -2.23617943 |
| H                                       | 2.96425794  | -2.10735675 | -2.27397532 |
| H                                       | 4.32461507  | -2.54504367 | -0.23151069 |
| H                                       | 4.00723228  | -1.15871432 | 1.81610800  |
| H                                       | 2.24754648  | 0.56173064  | 1.89296190  |
| H                                       | 1.46553540  | 1.27598654  | -0.35930998 |
| C1                                      | -3.69529535 | 1.95447729  | 0.58691590  |
| C1                                      | -3.04098923 | 0.55531327  | 3.82140931  |
| C1                                      | -3.16764296 | -1.62662798 | 1.00878534  |
| C                                       | -0.04280463 | -1.36881780 | 2.99331733  |
| H                                       | 0.17561066  | -1.55337407 | 4.05292668  |
| H                                       | -1.01998889 | -1.79804500 | 2.71616162  |
| H                                       | 0.72197536  | -1.87427855 | 2.37867478  |

37

Energy -2316.451548254 Dipole 7.090715

|    |             |             |             |
|----|-------------|-------------|-------------|
| C  | -0.99285151 | 0.81787186  | 1.46405088  |
| C  | -1.00746496 | 0.21255330  | 0.22455376  |
| C  | -1.43086194 | 0.77234907  | -1.04230586 |
| C  | -0.08631501 | 0.33374363  | 2.58030842  |
| C  | -1.54536982 | -0.09580494 | -2.15069764 |
| C  | -1.95275670 | 0.38512927  | -3.39068100 |
| C  | -2.24356352 | 1.74398825  | -3.54684100 |
| C  | -2.12721353 | 2.61896538  | -2.45961690 |
| C  | -1.72673753 | 2.14178737  | -1.21758342 |
| O  | 0.40269651  | 1.17822768  | 3.30426240  |
| Al | -3.14594168 | 0.03235488  | 1.97939858  |
| H  | -1.23673305 | 1.88560973  | 1.55760885  |
| H  | -0.66345860 | -0.82754866 | 0.17428323  |
| H  | -1.32495470 | -1.15858680 | -2.01640868 |
| H  | -2.04650268 | -0.29754543 | -4.23843897 |
| H  | -2.56049202 | 2.12564039  | -4.52089722 |
| H  | -2.35210501 | 3.68047527  | -2.58652836 |
| H  | -1.63436168 | 2.83216417  | -0.37676130 |
| C  | 2.75122766  | 0.26118152  | -0.46316915 |
| C  | 2.38114369  | -0.82810345 | -1.25838766 |
| C  | 2.72164543  | -2.12682785 | -0.86794887 |
| C  | 3.43617788  | -2.33556814 | 0.31583241  |
| C  | 3.80874078  | -1.24592415 | 1.10884385  |
| C  | 3.46469958  | 0.05253552  | 0.72069865  |
| H  | 1.82988613  | -0.66176156 | -2.18811465 |
| H  | 2.43634635  | -2.97900036 | -1.49093551 |
| H  | 3.70653946  | -3.35055687 | 0.61940162  |
| H  | 4.36873175  | -1.40872158 | 2.03357524  |
| H  | 3.75197666  | 0.90339236  | 1.34369319  |
| H  | 2.48628887  | 1.27658693  | -0.76980543 |
| Cl | -4.33195396 | 1.58562130  | 1.12276061  |
| Cl | -2.98209256 | 0.04274896  | 4.10634227  |
| Cl | -3.35534070 | -1.92097444 | 1.11867938  |
| C  | 0.22858613  | -1.13920363 | 2.68521864  |
| H  | 0.64768998  | -1.33856135 | 3.68027954  |
| H  | -0.66294303 | -1.76537040 | 2.51732218  |
| H  | 0.98763733  | -1.40286724 | 1.92800794  |

**Structure 41 and benzene loss product**

38

Energy -2316.765314175 Charge 1 Dipole 8.026312

|    |             |             |             |
|----|-------------|-------------|-------------|
| C  | 0.10038855  | 0.72526814  | 1.40135604  |
| C  | 0.28961137  | -0.05786366 | 0.15276368  |
| C  | -0.63056838 | 0.43808294  | -0.95332055 |
| C  | 0.11175220  | 0.16028640  | 2.63775442  |
| C  | -1.60071430 | -0.42796478 | -1.49231886 |
| C  | -2.47441674 | 0.02074095  | -2.49455714 |
| C  | -2.39087707 | 1.33582628  | -2.96111665 |
| C  | -1.42724724 | 2.19572540  | -2.43236392 |
| C  | -0.55369172 | 1.74833644  | -1.43723401 |
| O  | 0.46866082  | -1.14860594 | 2.73530821  |
| Al | -3.93532318 | -0.04412944 | 0.35644717  |
| H  | -0.14346042 | 1.78601498  | 1.32579722  |
| H  | 0.06065655  | -1.11370120 | 0.36475919  |
| H  | -1.64440036 | -1.47076212 | -1.16088204 |
| H  | -3.21307454 | -0.66619504 | -2.91379752 |
| H  | -3.07338384 | 1.68525826  | -3.73905039 |
| H  | -1.35619086 | 3.22503913  | -2.79221540 |
| H  | 0.18606188  | 2.44790735  | -1.03194026 |
| C  | 1.80234701  | -0.07045709 | -0.36826634 |
| C  | 1.94877167  | -0.76841132 | -1.65403348 |
| C  | 2.85596998  | -1.78589803 | -1.83010147 |
| C  | 3.71190516  | -2.14984579 | -0.77109898 |
| C  | 3.66977344  | -1.48478861 | 0.46900973  |
| C  | 2.74354226  | -0.48931524 | 0.67738422  |
| H  | 1.29306545  | -0.46150773 | -2.47365031 |
| H  | 2.92792499  | -2.30570559 | -2.78815012 |
| H  | 4.42365624  | -2.96813779 | -0.91559274 |

|    |             |             |             |
|----|-------------|-------------|-------------|
| H  | 4.35572584  | -1.77991976 | 1.26602892  |
| H  | 2.66917731  | 0.00546997  | 1.64875107  |
| H  | 1.96534915  | 1.01377628  | -0.56599609 |
| Cl | -5.53565668 | -0.62017684 | -0.88112262 |
| Cl | -3.57052282 | 1.98439044  | 0.80266138  |
| Cl | -3.04183434 | -1.52978893 | 1.58083843  |
| C  | -0.25707763 | 0.87260476  | 3.89715019  |
| H  | -1.16124037 | 0.41358787  | 4.33578954  |
| H  | 0.55288258  | 0.80964253  | 4.64467825  |
| H  | -0.47643049 | 1.93110496  | 3.70477091  |
| H  | 0.34888853  | -1.45588818 | 3.65556035  |

38

Energy -2316.805633556 Charge 1 Dipole 7.269195

|    |             |             |             |
|----|-------------|-------------|-------------|
| C  | -0.51699548 | 1.24253151  | 2.05176459  |
| C  | -0.07579050 | 0.87618215  | 0.78867895  |
| C  | -0.77595666 | 1.03600208  | -0.44241418 |
| C  | 0.23983144  | 1.03336586  | 3.21001278  |
| C  | -0.17846551 | 0.50387217  | -1.61666663 |
| C  | -0.82574578 | 0.60096312  | -2.84193930 |
| C  | -2.07181213 | 1.23038006  | -2.92239504 |
| C  | -2.67668055 | 1.77382260  | -1.77291839 |
| C  | -2.04064891 | 1.68226540  | -0.54513481 |
| O  | 1.44312740  | 0.48855811  | 3.09537200  |
| Al | -4.23147423 | -1.00642452 | -0.03144748 |
| H  | -1.49937956 | 1.69271273  | 2.19898274  |
| H  | 0.90581094  | 0.39066566  | 0.71481704  |
| H  | 0.79293956  | 0.00503434  | -1.54617337 |
| H  | -0.36198164 | 0.18437501  | -3.73847018 |
| H  | -2.58195952 | 1.30838697  | -3.88601245 |
| H  | -3.64296130 | 2.27711027  | -1.85377222 |
| H  | -2.51059486 | 2.12419607  | 0.33598465  |
| C  | 3.60372388  | -0.63898003 | -1.35392631 |
| C  | 3.08444232  | -1.27692497 | -2.48512206 |
| C  | 2.20106659  | -2.35217850 | -2.33897976 |
| C  | 1.83551085  | -2.79010811 | -1.06230146 |
| C  | 2.35913097  | -2.15669959 | 0.06933345  |
| C  | 3.24322782  | -1.08153222 | -0.07625442 |
| H  | 3.38326054  | -0.94576021 | -3.48332647 |
| H  | 1.80841772  | -2.86132704 | -3.22327148 |
| H  | 1.15478279  | -3.63796512 | -0.94917720 |
| H  | 2.09408383  | -2.51942085 | 1.06651957  |
| H  | 3.67556844  | -0.60240164 | 0.80695902  |
| H  | 4.30704810  | 0.19008510  | -1.46854637 |
| Cl | -5.77418027 | -0.51626594 | -1.36090938 |
| Cl | -4.19200720 | -0.13934764 | 1.89629643  |
| Cl | -2.70731713 | -2.35347941 | -0.55800678 |
| C  | -0.24870752 | 1.39590546  | 4.56686630  |
| H  | -0.26865578 | 0.50060836  | 5.21445416  |
| H  | 0.43489195  | 2.12770084  | 5.03434887  |
| H  | -1.25708649 | 1.82673773  | 4.53454013  |
| H  | 1.87153588  | 0.38735419  | 3.97223507  |

### Structure 42 and benzene loss product

41

Energy -3939.048841745 Dipole 13.858925

|    |             |             |             |
|----|-------------|-------------|-------------|
| C  | -0.74672976 | 0.72706196  | 0.88784651  |
| C  | -0.25430502 | 0.04996395  | -0.37554844 |
| C  | -0.89779709 | 0.58695053  | -1.64572993 |
| C  | -0.31516943 | 0.22514766  | 2.14379243  |
| C  | -1.63142661 | -0.26298361 | -2.48355485 |
| C  | -2.21606829 | 0.22743732  | -3.65379657 |
| C  | -2.06538340 | 1.56909780  | -4.00538293 |
| C  | -1.32805079 | 2.42306584  | -3.18029787 |
| C  | -0.74766471 | 1.93199986  | -2.01175721 |
| O  | 0.24865633  | -0.93668813 | 2.17401102  |
| Al | -3.00060941 | 0.21729188  | 1.04798459  |
| H  | -0.91475353 | 1.81209498  | 0.85129444  |
| H  | -0.47321811 | -1.02472975 | -0.27542501 |
| H  | -1.77458438 | -1.30858415 | -2.19807332 |

|    |             |             |             |
|----|-------------|-------------|-------------|
| H  | -2.79822224 | -0.44541577 | -4.28853861 |
| H  | -2.52382705 | 1.95275458  | -4.92027942 |
| H  | -1.21128393 | 3.47696612  | -3.44460374 |
| H  | -0.18399955 | 2.62041918  | -1.37060678 |
| C  | 1.33034745  | 0.11276608  | -0.58752117 |
| C  | 1.69638814  | -0.77335550 | -1.70837484 |
| C  | 2.67879348  | -1.72029997 | -1.59718783 |
| C  | 3.40899725  | -1.83647883 | -0.39105345 |
| C  | 3.18589595  | -0.97090087 | 0.68366168  |
| C  | 2.17441640  | -0.03343969 | 0.60526540  |
| H  | 1.10716766  | -0.68128787 | -2.62508640 |
| H  | 2.89857361  | -2.39214698 | -2.42982843 |
| H  | 4.17106256  | -2.61563614 | -0.29798614 |
| H  | 3.77051159  | -1.05748521 | 1.60226666  |
| H  | 2.04200941  | 0.66911914  | 1.43004449  |
| H  | 1.45899494  | 1.16452918  | -0.93271413 |
| Al | 1.07464640  | -1.96291243 | 3.51967271  |
| Cl | 1.80518508  | -3.66672449 | 2.43012808  |
| Cl | 2.70391280  | -0.67507842 | 4.17582231  |
| Cl | -0.37915728 | -2.35557979 | 5.03151277  |
| Cl | -3.87215804 | 1.70121579  | -0.22874900 |
| Cl | -3.64893910 | 0.44942051  | 3.07673889  |
| Cl | -3.04215616 | -1.82823076 | 0.38365928  |
| C  | -0.42768369 | 1.02212692  | 3.40367142  |
| H  | -0.90847690 | 0.41380104  | 4.18672566  |
| H  | 0.59696472  | 1.24236009  | 3.75682362  |
| H  | -0.99085932 | 1.95236795  | 3.26117410  |

41

Energy -3939.097358197 Dipole 11.174785

|    |             |             |             |
|----|-------------|-------------|-------------|
| C  | -1.55299065 | 0.84068904  | 1.48286419  |
| C  | -0.79892861 | 0.62791579  | 0.33919160  |
| C  | -0.95998706 | 1.21425867  | -0.96055001 |
| C  | -1.03209823 | 0.41433547  | 2.78533583  |
| C  | -0.08840951 | 0.77781407  | -1.98882502 |
| C  | -0.18111002 | 1.31902766  | -3.26533641 |
| C  | -1.13589175 | 2.30440544  | -3.53520129 |
| C  | -2.00119616 | 2.75305496  | -2.52609542 |
| C  | -1.91848622 | 2.21682581  | -1.25002420 |
| O  | -0.06200948 | -0.38967753 | 2.82362605  |
| Al | -3.18144923 | -1.01056390 | 0.90338948  |
| H  | -2.35657682 | 1.58346764  | 1.50357666  |
| H  | 0.04335898  | -0.06770771 | 0.44903410  |
| H  | 0.65458265  | 0.00541896  | -1.77097727 |
| H  | 0.49423904  | 0.97266198  | -4.05048973 |
| H  | -1.20747113 | 2.73319263  | -4.53832780 |
| H  | -2.74016283 | 3.52699925  | -2.74512840 |
| H  | -2.59326856 | 2.57437343  | -0.47030666 |
| C  | 3.27760687  | -0.89578568 | -2.83121256 |
| C  | 2.37351865  | -1.94156824 | -3.04572373 |
| C  | 1.79769738  | -2.60254474 | -1.95575314 |
| C  | 2.12930064  | -2.22098194 | -0.65148085 |
| C  | 3.03363518  | -1.17525189 | -0.43699998 |
| C  | 3.60584443  | -0.51142020 | -1.52706212 |
| H  | 2.12275528  | -2.24832716 | -4.06516166 |
| H  | 1.09194063  | -3.42105704 | -2.12190001 |
| H  | 1.69303569  | -2.74076917 | 0.20612153  |
| H  | 3.29520181  | -0.89282404 | 0.58687458  |
| H  | 4.31733014  | 0.30194954  | -1.35925341 |
| H  | 3.73559525  | -0.38489785 | -3.68304463 |
| Al | 1.07047467  | -1.00978231 | 4.24986463  |
| Cl | 2.44356526  | -2.28816575 | 3.22744616  |
| Cl | 1.90194709  | 0.84219377  | 4.96267246  |
| Cl | -0.26562138 | -1.97548217 | 5.62061125  |
| Cl | -4.58187007 | 0.23497072  | -0.10449761 |
| Cl | -3.66912388 | -1.55471933 | 2.89519838  |
| Cl | -2.04489417 | -2.38241937 | -0.24740311 |
| C  | -1.59976488 | 1.00680756  | 4.02717351  |
| H  | -1.70857131 | 0.22192537  | 4.79479060  |
| H  | -0.84921589 | 1.71996198  | 4.42074410  |

H -2.55253183 1.52169628 3.85223990

*Pre-reaction complex, TS and product of the reaction 43 + C<sub>6</sub>H<sub>6</sub> →*

35

Energy -694.3582586686 Charge 2 Dipole 12.215958 ZPE 0.286661 G(298) 148.80 HoF  
422.76 kcal Edisp -28.03

|   |             |             |             |
|---|-------------|-------------|-------------|
| C | 1.59183257  | -0.71218143 | -0.91201300 |
| C | 0.51376209  | 0.23095699  | -0.75641065 |
| C | -0.84578701 | -0.06407308 | -0.94030842 |
| C | 2.88025198  | -0.34580374 | -1.04649802 |
| C | -1.76183968 | 1.04309689  | -1.02232643 |
| C | -3.08071994 | 0.84064074  | -1.39165895 |
| C | -3.53587766 | -0.46118738 | -1.64688537 |
| C | -2.67618913 | -1.57365396 | -1.50963304 |
| C | -1.35692902 | -1.38863957 | -1.15590245 |
| O | 3.77073215  | -1.58866540 | -1.29054755 |
| H | 1.35753958  | -1.77787248 | -0.98634591 |
| H | 0.77681967  | 1.28682945  | -0.65217043 |
| H | -1.38692058 | 2.05508988  | -0.85041786 |
| H | -3.76124122 | 1.68897953  | -1.49302028 |
| H | -4.57449210 | -0.62094536 | -1.95095491 |
| H | -3.06105483 | -2.57932023 | -1.69321934 |
| H | -0.70568997 | -2.25976537 | -1.05794169 |
| C | -1.09043952 | -0.93795522 | 2.34674334  |
| C | -2.02631157 | 0.10209280  | 2.27345261  |
| C | -1.60207562 | 1.44691092  | 2.20450734  |
| C | -0.24355715 | 1.74752076  | 2.18406403  |
| C | 0.69482370  | 0.70384697  | 2.21898584  |
| C | 0.26908055  | -0.63939559 | 2.31741212  |
| H | -3.09526625 | -0.12368606 | 2.31622823  |
| H | -2.34479734 | 2.24889190  | 2.20889358  |
| H | 0.09127873  | 2.78810994  | 2.17508401  |
| H | 1.76271801  | 0.93816254  | 2.26222303  |
| H | 1.00844095  | -1.43843749 | 2.41988815  |
| H | -1.42937421 | -1.97072461 | 2.45828699  |
| C | 3.65401537  | 0.90259221  | -1.03252896 |
| H | 4.43039091  | 0.90217615  | -0.24461633 |
| H | 4.15019886  | 1.09678900  | -2.00129233 |
| H | 2.98122066  | 1.74963858  | -0.83109241 |
| H | 4.08463611  | -1.66080919 | -2.23074875 |
| H | 4.56082092  | -1.62920908 | -0.68923618 |

35

Energy -694.3482019791 Charge 2 Dipole 10.075544 ZPE 0.287390 G(298.15) 151.68 HoF  
429.07 kcal Edisp -27.45

|   |             |             |             |
|---|-------------|-------------|-------------|
| C | 1.25005571  | -0.90660549 | -0.61028714 |
| C | 0.09850951  | -0.03965520 | -0.28781834 |
| C | -1.13801408 | -0.30140425 | -1.01224290 |
| C | 2.47328626  | -0.44717837 | -0.88327363 |
| C | -1.92747370 | 0.81040847  | -1.40329421 |
| C | -3.07762264 | 0.62456311  | -2.15745298 |
| C | -3.48270742 | -0.67266139 | -2.50598930 |
| C | -2.72711244 | -1.78527769 | -2.10469009 |
| C | -1.56540355 | -1.60609673 | -1.36679697 |
| O | 3.39790624  | -1.61283428 | -1.34270616 |
| H | 1.06870633  | -1.97997190 | -0.72287902 |
| H | 0.33524877  | 1.02316123  | -0.17430444 |
| H | -1.61481738 | 1.82225638  | -1.12842903 |
| H | -3.66835283 | 1.48654567  | -2.47577450 |
| H | -4.39744996 | -0.81899758 | -3.08631805 |
| H | -3.05684537 | -2.79225784 | -2.36972427 |
| H | -1.00517719 | -2.49001141 | -1.04854525 |
| C | -0.24766233 | -0.40762566 | 1.72696661  |
| C | -1.39607025 | 0.41255242  | 1.99172654  |
| C | -1.29194514 | 1.52793391  | 2.79984042  |
| C | -0.05270483 | 1.85074762  | 3.38575652  |
| C | 1.08070211  | 1.03962478  | 3.18610008  |
| C | 0.98256034  | -0.08912470 | 2.39308149  |
| H | -2.35258577 | 0.15228780  | 1.53046457  |
| H | -2.16659703 | 2.15153673  | 2.99892696  |

|   |             |             |             |
|---|-------------|-------------|-------------|
| H | 0.02703286  | 2.73914112  | 4.01929246  |
| H | 2.01779747  | 1.28598822  | 3.69089575  |
| H | 1.84056071  | -0.75778892 | 2.28390554  |
| H | -0.43700324 | -1.46475894 | 1.50344990  |
| C | 3.16999494  | 0.84968966  | -0.90358275 |
| H | 4.05798664  | 0.85568744  | -0.24566754 |
| H | 3.49069420  | 1.13541559  | -1.92135612 |
| H | 2.48812421  | 1.63278143  | -0.53922054 |
| H | 3.54242367  | -1.61888795 | -2.32510625 |
| H | 4.28395518  | -1.60918329 | -0.89494734 |

35

Energy -694.355288044 Charge 2 Dipole 9.595466 ZPE 0.288094 G(298.15) 152.26 HoF  
424.63 kcal Edisp -27.10

|   |             |             |             |
|---|-------------|-------------|-------------|
| C | 1.32635019  | -0.81067352 | -0.41276428 |
| C | 0.19659239  | 0.10926921  | -0.00470700 |
| C | -1.00949165 | -0.20120360 | -0.87717373 |
| C | 2.39399894  | -0.42876062 | -1.10755944 |
| C | -1.49650248 | 0.78515734  | -1.74997020 |
| C | -2.58580240 | 0.51278098  | -2.57894345 |
| C | -3.19873305 | -0.74299580 | -2.54103656 |
| C | -2.72143872 | -1.73007167 | -1.67164081 |
| C | -1.63273146 | -1.46120122 | -0.84267536 |
| O | 3.24027050  | -1.67292170 | -1.53719201 |
| H | 1.19677715  | -1.87984900 | -0.20975145 |
| H | 0.48717858  | 1.15943552  | -0.16328152 |
| H | -1.02796302 | 1.77402116  | -1.78200714 |
| H | -2.96093576 | 1.28629085  | -3.25323826 |
| H | -4.05712914 | -0.95197948 | -3.18402300 |
| H | -3.20382534 | -2.70959873 | -1.63678851 |
| H | -1.28297318 | -2.24935589 | -0.16522276 |
| C | -0.14460005 | -0.02751905 | 1.55708755  |
| C | -1.37707559 | 0.68181984  | 1.94643180  |
| C | -1.46848686 | 1.36064743  | 3.13866345  |
| C | -0.33972113 | 1.44357214  | 3.98006965  |
| C | 0.88819398  | 0.82780853  | 3.64912184  |
| C | 0.99757342  | 0.12388479  | 2.47470791  |
| H | -2.22979215 | 0.62952377  | 1.26195195  |
| H | -2.39927310 | 1.85488342  | 3.42752522  |
| H | -0.41435550 | 2.00802704  | 4.91580742  |
| H | 1.73796468  | 0.91616760  | 4.33031559  |
| H | 1.93915241  | -0.37132593 | 2.21726111  |
| H | -0.43520196 | -1.10983938 | 1.66221856  |
| C | 2.96524559  | 0.82315162  | -1.63748183 |
| H | 4.00235622  | 0.98890443  | -1.29490244 |
| H | 2.95187844  | 0.85292833  | -2.74119030 |
| H | 2.36577071  | 1.67290702  | -1.27744297 |
| H | 3.08210933  | -1.92473531 | -2.48398895 |
| H | 4.21462001  | -1.53915011 | -1.40818010 |

### Dication 43

23

Energy -462.3325434828 Charge 2 Dipole 8.242400 ZPE 0.188187 G(298.15) 94.33 HoF  
420.24 kcal Edisp -14.63

|   |             |             |             |
|---|-------------|-------------|-------------|
| C | 1.25972037  | -0.50435019 | 0.00667810  |
| C | 0.18237046  | 0.44461863  | 0.03996400  |
| C | -1.17708095 | 0.15518279  | -0.04226717 |
| C | 2.55269810  | -0.13017655 | 0.10670502  |
| C | -2.09613838 | 1.27137784  | 0.01134054  |
| C | -3.45476757 | 1.06007605  | -0.06272736 |
| C | -3.94276689 | -0.25735863 | -0.19127708 |
| C | -3.06966647 | -1.37116226 | -0.24594410 |
| C | -1.70992784 | -1.18006757 | -0.17395859 |
| O | 3.46848968  | -1.36991615 | 0.02241556  |
| H | 1.04175168  | -1.57063762 | -0.09956944 |
| H | 0.44907810  | 1.50257184  | 0.14020813  |
| H | -1.69738994 | 2.28505062  | 0.11117870  |
| H | -4.15253277 | 1.89969991  | -0.02274092 |
| H | -5.02315765 | -0.42493102 | -0.25020825 |
| H | -3.48443175 | -2.37691208 | -0.34512037 |

|   |             |             |             |
|---|-------------|-------------|-------------|
| H | -1.04562001 | -2.04558646 | -0.21659137 |
| C | 3.30437174  | 1.11462314  | 0.28050854  |
| H | 3.90559259  | 1.10263380  | 1.21031664  |
| H | 3.99313691  | 1.30104583  | -0.56516968 |
| H | 2.61520215  | 1.96966189  | 0.34761540  |
| H | 3.96555978  | -1.43815463 | -0.83733813 |
| H | 4.11550867  | -1.43728919 | 0.77598183  |

### Structure 44 and benzene loss product

38

Energy -2316.78096747 Charge 1 Dipole 7.382640

|    |             |             |             |
|----|-------------|-------------|-------------|
| C  | -0.78826006 | 0.93783206  | -0.34700979 |
| C  | -0.06573494 | -0.15030462 | 0.38534828  |
| C  | -0.97524900 | -1.33002524 | 0.69126011  |
| C  | -0.96666380 | 2.19470479  | 0.07886868  |
| C  | -1.15438851 | -1.73647222 | 2.02133302  |
| C  | -2.01005683 | -2.79650669 | 2.32873913  |
| C  | -2.68617368 | -3.46796593 | 1.30791867  |
| C  | -2.50797887 | -3.07404237 | -0.02197538 |
| C  | -1.65641181 | -2.01269516 | -0.32865152 |
| O  | -1.60714545 | 3.05737272  | -0.86157941 |
| H  | -1.20560076 | 0.68623172  | -1.32866534 |
| H  | 0.34293064  | 0.22893598  | 1.33543748  |
| H  | -0.62971671 | -1.21365894 | 2.82751555  |
| H  | -2.14844847 | -3.09736795 | 3.36997191  |
| H  | -3.35209839 | -4.30060353 | 1.54666300  |
| H  | -3.03745814 | -3.59403808 | -0.82373791 |
| H  | -1.54033362 | -1.71576719 | -1.37710494 |
| C  | 1.20014481  | -0.62836448 | -0.46847092 |
| C  | 1.86548558  | -1.82193323 | 0.07134807  |
| C  | 3.23539078  | -1.91989698 | 0.12529805  |
| C  | 4.02781100  | -0.84190709 | -0.32199566 |
| C  | 3.45724049  | 0.33507352  | -0.84142216 |
| C  | 2.08696637  | 0.45631994  | -0.90779529 |
| H  | 1.22839844  | -2.63723428 | 0.42737986  |
| H  | 3.71444644  | -2.81792488 | 0.52177102  |
| H  | 5.11777575  | -0.92178494 | -0.25726490 |
| H  | 4.09969104  | 1.15037124  | -1.18247529 |
| H  | 1.63871313  | 1.37776581  | -1.30311582 |
| H  | 0.70315940  | -0.98064897 | -1.41252706 |
| C  | -0.57020333 | 2.87489538  | 1.34029557  |
| H  | 0.13289966  | 3.69794450  | 1.12563245  |
| H  | -1.45411144 | 3.30414446  | 1.84622079  |
| H  | -0.10065009 | 2.17717327  | 2.04608356  |
| Al | -0.72674412 | 3.62371128  | -2.59101681 |
| H  | -2.08684879 | 3.79828550  | -0.42682489 |
| Cl | -1.89577218 | 5.36645327  | -2.86456373 |
| Cl | -0.98069063 | 1.91147718  | -3.83219740 |
| Cl | 1.29568605  | 3.88045016  | -1.89869096 |

38

Energy -2316.8111221 Charge 1 Dipole 2.617770

|   |             |             |             |
|---|-------------|-------------|-------------|
| C | -1.39826578 | 0.88983805  | -0.25278237 |
| C | -0.93471008 | -0.34056623 | 0.20177135  |
| C | -1.72151652 | -1.50709471 | 0.40656753  |
| C | -0.57656306 | 1.99152860  | -0.43599018 |
| C | -1.06733020 | -2.67618831 | 0.89077721  |
| C | -1.78038806 | -3.84277835 | 1.11347822  |
| C | -3.15860698 | -3.86979471 | 0.85665246  |
| C | -3.82501949 | -2.72902884 | 0.37666207  |
| C | -3.12245696 | -1.55857569 | 0.15176462  |
| O | -1.20186892 | 3.08954286  | -0.92782797 |
| H | -2.45850397 | 1.03267682  | -0.48324881 |
| H | 0.13581382  | -0.44485344 | 0.41999007  |
| H | 0.00768860  | -2.63928937 | 1.08667841  |
| H | -1.27512461 | -4.73619642 | 1.48597331  |
| H | -3.72302279 | -4.78981378 | 1.03060083  |
| H | -4.89849537 | -2.76879658 | 0.18001010  |
| H | -3.65166446 | -0.68024936 | -0.22444732 |
| C | 3.60169622  | -0.41961909 | -0.98537701 |



|    |             |             |             |
|----|-------------|-------------|-------------|
| C  | 2.94346363  | -1.23798390 | -0.06041955 |
| C  | 2.92763071  | -0.88940449 | 1.29555104  |
| C  | 3.57061308  | 0.27755126  | 1.72651574  |
| C  | 4.23407633  | 1.09043863  | 0.80195621  |
| C  | 4.24951443  | 0.74204007  | -0.55283085 |
| H  | 2.47504783  | -2.16755934 | -0.39758714 |
| H  | 2.44953402  | -1.54514934 | 2.02974781  |
| H  | 3.57761538  | 0.53755805  | 2.78839062  |
| H  | 4.75871956  | 1.98737161  | 1.14194366  |
| H  | 4.78792294  | 1.36612677  | -1.27130743 |
| H  | 3.63302551  | -0.70307305 | -2.04078479 |
| C  | 0.87387326  | 2.12784542  | -0.17970212 |
| H  | 1.40825654  | 2.26179656  | -1.13836322 |
| H  | 1.06456372  | 3.02432584  | 0.43678941  |
| H  | 1.30793232  | 1.25938073  | 0.33111625  |
| Al | -3.05300946 | 3.48100388  | -2.12167943 |
| H  | -0.61737040 | 3.87931046  | -1.03819383 |
| Cl | -2.35277930 | 5.46414498  | -2.38526135 |
| Cl | -4.48691860 | 3.01168624  | -0.63831722 |
| Cl | -2.70337291 | 2.03184815  | -3.61881631 |

### Structure 45 and benzene loss product

41

Energy -3939.052596339 Dipole 21.071528

|    |             |             |             |
|----|-------------|-------------|-------------|
| C  | -0.61474500 | -0.67954888 | -0.00762913 |
| C  | 0.28469639  | 0.49403064  | 0.08120881  |
| C  | 0.50106509  | 0.93355378  | 1.52476538  |
| C  | -1.75780467 | -0.76138422 | -0.72945070 |
| C  | 0.12906759  | 2.22679841  | 1.91346340  |
| C  | 0.29183708  | 2.64444742  | 3.23646648  |
| C  | 0.83645495  | 1.77518095  | 4.18296098  |
| C  | 1.21078603  | 0.48332397  | 3.80300912  |
| C  | 1.04359256  | 0.06542006  | 2.48231607  |
| O  | -2.45290147 | -1.96713075 | -0.68966522 |
| H  | -0.33950840 | -1.56663890 | 0.57232292  |
| H  | -0.12954725 | 1.34433037  | -0.48236673 |
| H  | -0.30865825 | 2.90953593  | 1.17862654  |
| H  | -0.01564974 | 3.65198646  | 3.52748108  |
| H  | 0.96228114  | 2.09959456  | 5.21881601  |
| H  | 1.62478623  | -0.20807486 | 4.54095887  |
| H  | 1.32298145  | -0.95856470 | 2.21107755  |
| C  | 1.70322222  | 0.18108308  | -0.58949934 |
| C  | 2.66845645  | 1.27050227  | -0.39195361 |
| C  | 3.37232152  | 1.81494627  | -1.44024121 |
| C  | 3.20287737  | 1.29883809  | -2.74086713 |
| C  | 2.32851049  | 0.22638371  | -2.99356688 |
| C  | 1.59091073  | -0.31588503 | -1.96505743 |
| H  | 2.79220968  | 1.65655413  | 0.62360765  |
| H  | 4.06647002  | 2.64137424  | -1.27100405 |
| H  | 3.75921211  | 1.74564729  | -3.57037238 |
| H  | 2.21593238  | -0.16447714 | -4.00775282 |
| H  | 0.87365399  | -1.12119568 | -2.17887990 |
| H  | 2.02859427  | -0.68030371 | 0.04281472  |
| C  | -2.39779090 | 0.27604099  | -1.58538312 |
| H  | -2.46258192 | -0.10103512 | -2.61967023 |
| H  | -3.42907174 | 0.45487225  | -1.23422688 |
| H  | -1.85451661 | 1.23088754  | -1.57256770 |
| Al | -1.63393803 | -3.40930926 | -1.65005598 |
| Al | -4.06390053 | -2.06828407 | 0.41192111  |
| Cl | -3.14944268 | -4.80682481 | -2.14464908 |
| Cl | 0.01670261  | -4.10057093 | -0.44194959 |
| Cl | -0.83839088 | -2.39808173 | -3.42352465 |
| Cl | -3.84298115 | -0.33967819 | 1.69004672  |
| Cl | -3.84307290 | -3.92066673 | 1.44727326  |
| Cl | -5.69212024 | -1.85767771 | -0.95880291 |

41

Energy -3939.103751701 Dipole 14.212780

|   |             |             |            |
|---|-------------|-------------|------------|
| C | -1.34388460 | -0.69793855 | 0.49473867 |
| C | -0.45624452 | 0.33897849  | 0.66209935 |

|    |             |             |             |
|----|-------------|-------------|-------------|
| C  | 0.07197798  | 0.79901112  | 1.91679289  |
| C  | -1.86450844 | -1.09294765 | -0.75319948 |
| C  | 1.07370670  | 1.80078461  | 1.89707560  |
| C  | 1.61135020  | 2.28579285  | 3.08291790  |
| C  | 1.15439287  | 1.78775214  | 4.30805015  |
| C  | 0.15781494  | 0.80152380  | 4.34644487  |
| C  | -0.38077001 | 0.30732236  | 3.16760592  |
| O  | -2.67581099 | -2.14839412 | -0.77281266 |
| H  | -1.67278279 | -1.29825362 | 1.34973631  |
| H  | -0.08839632 | 0.86721545  | -0.22502628 |
| H  | 1.43067538  | 2.17571594  | 0.93332278  |
| H  | 2.38636968  | 3.05516004  | 3.05861354  |
| H  | 1.57296640  | 2.17173846  | 5.24206372  |
| H  | -0.19967347 | 0.42378219  | 5.30706978  |
| H  | -1.16760242 | -0.44985063 | 3.21083129  |
| C  | 3.09677134  | -0.08090413 | -1.32178499 |
| C  | 3.67512234  | 1.08113212  | -0.80312387 |
| C  | 3.33329834  | 2.33025659  | -1.33275478 |
| C  | 2.41444760  | 2.41668963  | -2.38344684 |
| C  | 1.84313330  | 1.25262762  | -2.90819885 |
| C  | 2.18309737  | 0.00320431  | -2.37736033 |
| H  | 4.40048216  | 1.01263835  | 0.01225253  |
| H  | 3.79475555  | 3.23864295  | -0.93521167 |
| H  | 2.15519640  | 3.39167250  | -2.80508990 |
| H  | 1.14369503  | 1.31858553  | -3.74683628 |
| H  | 1.74135613  | -0.90980716 | -2.78691268 |
| H  | 3.36326985  | -1.05829880 | -0.91102519 |
| C  | -1.67304964 | -0.37145071 | -2.03489888 |
| H  | -1.76908218 | -1.05548088 | -2.89147776 |
| H  | -2.51373693 | 0.34758769  | -2.10274336 |
| H  | -0.72696060 | 0.18166938  | -2.08309275 |
| Al | -2.12033496 | -3.72388353 | -1.91940021 |
| Al | -4.28845541 | -2.15790738 | 0.43923575  |
| Cl | -2.69069427 | -5.38972941 | -0.74270017 |
| Cl | 0.00976622  | -3.36206026 | -1.93368698 |
| Cl | -3.04716520 | -3.37210665 | -3.80612027 |
| Cl | -4.65804858 | -0.03688688 | 0.51247409  |
| Cl | -3.55943043 | -2.92380631 | 2.30370839  |
| Cl | -5.71701404 | -3.25977746 | -0.66812934 |

### Structure 16

21

|        |                 |             |             |     |          |           |       |       |        |
|--------|-----------------|-------------|-------------|-----|----------|-----------|-------|-------|--------|
| Energy | -2024.129849125 | Dipole      | 13.575899   | ZPE | 0.135194 | G(298.15) | 54.49 | Edisp | -16.56 |
| C      | -0.84845378     | 0.99598350  | 0.07291264  |     |          |           |       |       |        |
| C      | -0.22896832     | -0.21159528 | -0.02638582 |     |          |           |       |       |        |
| C      | 1.19903797      | -0.46436196 | -0.01899863 |     |          |           |       |       |        |
| C      | -2.24736211     | 1.09638903  | 0.05230546  |     |          |           |       |       |        |
| C      | 1.63828729      | -1.80032878 | -0.13794258 |     |          |           |       |       |        |
| C      | 2.99630469      | -2.10714757 | -0.13771241 |     |          |           |       |       |        |
| C      | 3.94021316      | -1.08434991 | -0.01834597 |     |          |           |       |       |        |
| C      | 3.52064705      | 0.24722789  | 0.10089443  |     |          |           |       |       |        |
| C      | 2.16643630      | 0.55704127  | 0.10093632  |     |          |           |       |       |        |
| N      | -3.40738675     | 1.19211292  | 0.03670395  |     |          |           |       |       |        |
| Al     | -5.40471186     | 1.27974982  | 0.00875605  |     |          |           |       |       |        |
| H      | -0.30614526     | 1.94009129  | 0.17275660  |     |          |           |       |       |        |
| H      | -0.86612971     | -1.09810829 | -0.12342584 |     |          |           |       |       |        |
| H      | 0.89661411      | -2.59900028 | -0.23120068 |     |          |           |       |       |        |
| H      | 3.32028740      | -3.14630311 | -0.23066857 |     |          |           |       |       |        |
| H      | 5.00706839      | -1.32149677 | -0.01764692 |     |          |           |       |       |        |
| H      | 4.26019210      | 1.04597693  | 0.19442978  |     |          |           |       |       |        |
| H      | 1.85794110      | 1.60113493  | 0.19532792  |     |          |           |       |       |        |
| Cl     | -5.77239843     | 2.40230115  | -1.77269317 |     |          |           |       |       |        |
| Cl     | -5.89478452     | -0.80184708 | -0.07192364 |     |          |           |       |       |        |
| Cl     | -5.82668883     | 2.27653028  | 1.85192108  |     |          |           |       |       |        |

### Structure 37

25

|        |                 |        |           |     |          |        |       |       |        |
|--------|-----------------|--------|-----------|-----|----------|--------|-------|-------|--------|
| Energy | -2084.487334966 | Dipole | 12.891787 | ZPE | 0.173258 | G(298) | 78.33 | Edisp | -20.15 |
|--------|-----------------|--------|-----------|-----|----------|--------|-------|-------|--------|

|    |             |             |             |
|----|-------------|-------------|-------------|
| C  | 0.05435948  | 1.33446118  | 0.00183040  |
| C  | -0.68176974 | 2.47886476  | 0.00119920  |
| C  | -0.18393612 | 3.84136806  | 0.00087773  |
| C  | -0.49197181 | -0.00083688 | 0.00144143  |
| C  | 1.19234496  | 4.16195149  | 0.00098619  |
| C  | 1.60684910  | 5.48777611  | 0.00026139  |
| C  | 0.66306771  | 6.52339506  | -0.00068389 |
| C  | -0.70218835 | 6.22552602  | -0.00090864 |
| C  | -1.12078884 | 4.89811696  | -0.00013335 |
| O  | 0.35358245  | -0.94728012 | 0.00194263  |
| H  | 1.14802649  | 1.35952436  | 0.00264948  |
| H  | -1.77419628 | 2.39297246  | 0.00053144  |
| H  | 1.94057125  | 3.36613154  | 0.00149351  |
| H  | 2.67397487  | 5.72241924  | 0.00025896  |
| H  | 0.99601224  | 7.56440421  | -0.00128345 |
| H  | -1.44034033 | 7.03096401  | -0.00175255 |
| H  | -2.18919838 | 4.66221868  | -0.00034895 |
| C  | -1.95067350 | -0.31095402 | 0.00004543  |
| H  | -2.16729695 | -0.94503950 | 0.87927030  |
| H  | -2.59859785 | 0.57238915  | 0.00066102  |
| H  | -2.16591490 | -0.94277569 | -0.88117299 |
| Al | 0.19689760  | -2.85196836 | -0.00019207 |
| Cl | 2.22102533  | -3.51785009 | 0.00120828  |
| Cl | -0.91059952 | -3.24506860 | -1.80624257 |
| Cl | -0.91425694 | -3.24945953 | 1.80262966  |

### Dication 5b

19

Energy -310.04032972875 Charge 2 Dipole 2.177546 ZPE 0.160406 G(298.15) 78.85 HoF  
391.84 kcal

|   |             |             |             |
|---|-------------|-------------|-------------|
| C | 0.69107502  | 0.06191604  | -0.10262790 |
| C | 0.13091086  | 1.39613905  | 0.30998266  |
| C | -0.17121261 | -1.17404782 | -0.11855022 |
| O | -0.92725242 | 1.34159671  | 1.03208792  |
| C | 0.42502474  | -2.40901113 | 0.34792157  |
| C | -1.51149863 | -1.16023926 | -0.66702587 |
| H | 1.59347213  | -0.08696594 | 0.53088987  |
| H | 1.11302264  | 0.14760072  | -1.13235798 |
| C | 0.80078174  | 2.64145622  | -0.04987976 |
| H | 0.48648736  | 3.50614294  | 0.55559071  |
| H | 1.90091160  | 2.53020741  | -0.03399397 |
| H | 0.55549012  | 2.85595396  | -1.11752951 |
| H | -1.25561612 | 2.22257696  | 1.36193379  |
| H | -0.10629732 | -3.32115956 | 0.03886392  |
| H | 1.51921888  | -2.47013456 | 0.19766459  |
| H | 0.32858416  | -2.34896634 | 1.46929967  |
| H | -1.97304909 | -0.18407505 | -0.85030022 |
| H | -1.41449904 | -1.69601010 | -1.65086209 |
| H | -2.18555403 | -1.85298026 | -0.12110719 |

### Dication 57

19

Energy -310.01484238176 Charge 2 Dipole 6.718744 ZPE 0.160937 G(298.15) 79.61 HoF  
407.83 kcal

|   |             |             |             |
|---|-------------|-------------|-------------|
| C | 0.80607002  | 0.04946783  | -0.00478390 |
| C | 0.30069245  | 1.30723274  | 0.06066072  |
| C | 0.06727180  | -1.19008946 | -0.05231296 |
| O | 1.37209867  | 2.34711724  | 0.09030316  |
| C | 0.82861578  | -2.41330122 | 0.20311275  |
| C | -1.35484914 | -1.30703819 | -0.38250376 |
| H | 1.89718586  | -0.06723525 | 0.04100909  |
| C | -1.01137397 | 1.93226016  | 0.23374779  |
| H | -1.77617302 | 1.18188128  | 0.47028150  |
| H | -0.99133186 | 2.65433713  | 1.07486664  |
| H | -1.32136596 | 2.48047535  | -0.67954075 |
| H | 1.08091716  | 3.29784258  | 0.02045272  |
| H | 2.22832308  | 2.17596241  | -0.39038254 |
| H | 0.19199722  | -3.24504131 | 0.54816222  |

|   |             |             |             |
|---|-------------|-------------|-------------|
| H | 1.20799073  | -2.75129815 | -0.79775149 |
| H | 1.72170392  | -2.27655415 | 0.83267813  |
| H | -1.79631662 | -0.46454609 | -0.92672331 |
| H | -1.54487149 | -2.25564228 | -0.91958157 |
| H | -1.90658463 | -1.45583064 | 0.57830555  |

***TS of rotation around the  $\alpha,\beta$ -C-C bond in 5b***

19  
 Energy -310.0388293211 Charge 2 Dipole 2.127410 ZPE 0.160276 G(298.15) 79.55 HoF  
 392.78 kcal Edisp -9.66

|   |             |             |             |
|---|-------------|-------------|-------------|
| C | -0.31759887 | -0.69983483 | 0.02104527  |
| C | 1.18457419  | -0.70659105 | 0.04825182  |
| C | -1.00205073 | 0.65508917  | 0.03206244  |
| O | 1.73911846  | 0.43759838  | 0.22913807  |
| C | -1.30367586 | 1.29864867  | 1.29091683  |
| C | -1.38299858 | 1.24955611  | -1.22841669 |
| H | -0.63002753 | -1.29905140 | 0.90448016  |
| H | -0.62503873 | -1.28958560 | -0.86743455 |
| C | 1.93468938  | -1.94683555 | -0.13404487 |
| H | 2.94459402  | -1.90794862 | 0.30838477  |
| H | 1.37916381  | -2.82874325 | 0.22605664  |
| H | 2.06246845  | -2.09847480 | -1.23279849 |
| H | 2.73468509  | 0.41884866  | 0.26642985  |
| H | -2.18887873 | 1.96090460  | 1.23583351  |
| H | -1.30092264 | 0.65090888  | 2.17881445  |
| H | -0.46748497 | 2.04245465  | 1.42531024  |
| H | -0.77461050 | 0.95198784  | -2.09848323 |
| H | -2.39186123 | 0.78067530  | -1.42910770 |
| H | -1.59414505 | 2.33039282  | -1.17643854 |

Complete basis set (CBS) extrapolation of PBE/ $\Lambda_0n$  family for the reaction **18** + C<sub>6</sub>H<sub>6</sub> → **28**

| Basis set    | $\zeta$  | Basis functions | Energy, a.u.         |               |               | $\Delta E$ , kcal/mol |              |
|--------------|----------|-----------------|----------------------|---------------|---------------|-----------------------|--------------|
|              |          |                 | Pre-reaction complex | TS            | Product       | $\Delta E^\ddagger$   | $\Delta E_0$ |
| $\Lambda_01$ | 2        | 299             | -634.013876          | -634.011884   | -634.022218   | 1.25                  | -5.23        |
| $\Lambda_02$ | 3        | 690             | -634.080432          | -634.077765   | -634.087496   | 1.67                  | -4.43        |
| $\Lambda_03$ | 4        | 1330            | -634.110949          | -634.107874   | -634.117612   | 1.93                  | -4.18        |
| $\Lambda_04$ | 5        | 2281            | -634.120063          | -634.116729   | -634.126405   | 2.09                  | -3.98        |
| $\Lambda_05$ | 6        | 3605            | -634.123983          | -634.120575   | -634.130276   | 2.14                  | -3.95        |
| CBS          | $\infty$ |                 | -634.132453 *        | -634.128801 * | -634.138592 * | 2.29                  | -3.85        |

\* Determined by non-linear fitting of the exponential-square root function  $E_{\Lambda_0n} = E_{\text{CBS}} + A \cdot \exp(-\alpha \cdot \sqrt{\zeta})$ , see for example [Kraus, P. (2021). Extrapolating DFT Toward the Complete Basis Set Limit: Lessons from the PBE Family of Functionals. *Journal of Chemical Theory and Computation*, 17(9), 5651–5660. doi:10.1021/acs.jctc.1c00542]

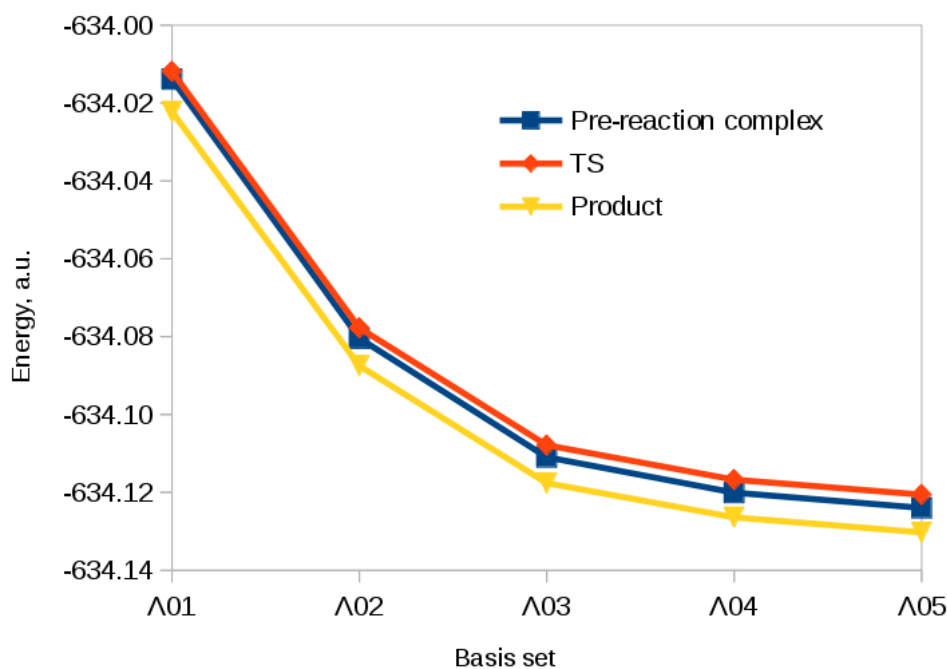

The expansion of the basis set increases the relative stability of the pre-reaction complex, which consists of two parts that are not linked to each other by valence bonds. The effect of CBS on  $\Delta E$  does not exceed 2 kcal/mol.

## M06/6-311+G(2d,2p)/SMD(benzene)//PBE/Λ01 energies

|                                                                                                            | Energy, a.u.                                                   |
|------------------------------------------------------------------------------------------------------------|----------------------------------------------------------------|
| Benzene C <sub>6</sub> H <sub>6</sub>                                                                      | -232.128197748527                                              |
| Cation <b>15</b>                                                                                           | -402.082829285007                                              |
| Cation <b>17</b>                                                                                           | -402.062056100520                                              |
| Dication <b>18</b>                                                                                         | -402.372212967414                                              |
| Dication <b>23</b>                                                                                         | -402.366954139754                                              |
| Structure <b>19</b>                                                                                        | -2025.331648173970                                             |
| Pre-reaction complex, TS and product of the reaction <b>17</b> + C <sub>6</sub> H <sub>6</sub> → <b>27</b> | -634.204234402791<br>-634.192322274779<br>-634.203719102093    |
| Pre-reaction complex, TS and product of the reaction <b>18</b> + C <sub>6</sub> H <sub>6</sub> → <b>28</b> | -634.513014278514<br>-634.504118486005<br>-634.522667765738    |
| Pre-reaction complex, TS and product of the reaction <b>19</b> + C <sub>6</sub> H <sub>6</sub> → <b>29</b> | -2257.469577855388<br>-2257.468439633262<br>-2257.482161644868 |
| Structures <b>25</b> and <b>15</b> + C <sub>6</sub> H <sub>6</sub>                                         | -634.173864733437<br>-634.216537005522                         |
| Structures <b>26</b> and <b>16</b> + C <sub>6</sub> H <sub>6</sub>                                         | -2257.054618287183<br>-2257.127249665506                       |
| Structures <b>30</b> and <b>20</b> + C <sub>6</sub> H <sub>6</sub>                                         | -2257.043693803555<br>-2257.085670360304                       |
| Structures <b>31</b> and <b>21</b> + C <sub>6</sub> H <sub>6</sub>                                         | -2257.429065872554<br>-2257.457001517715                       |
| Structures <b>32</b> and <b>22</b> + C <sub>6</sub> H <sub>6</sub>                                         | -3880.341110663898<br>-3880.373683226672                       |
| Structures <b>34</b> , TS <b>34</b> → <b>33</b> and <b>33</b>                                              | -634.558128922272<br>-634.495260272643<br>-634.515319143663    |
| Structures <b>35</b> and <b>24</b> + C <sub>6</sub> H <sub>6</sub>                                         | -3880.336798871455<br>-3880.374673356929                       |
| Cation <b>38</b>                                                                                           | -462.471488862617                                              |
| Dication <b>5a</b>                                                                                         | -462.776335938900                                              |
| Structure <b>39</b>                                                                                        | -2085.740601410303                                             |
| Pre-reaction complex, TS and product of the reaction <b>38</b> + C <sub>6</sub> H <sub>6</sub> → <b>49</b> | -694.607238410577<br>-694.594964125878<br>-694.600834228225    |
| Pre-reaction complex, TS and product of the reaction <b>5a</b> + C <sub>6</sub> H <sub>6</sub> → <b>50</b> | -694.922724302897<br>-694.912121592158<br>-694.933696824192    |
| Pre-reaction complex, TS and product of the reaction <b>39</b> + C <sub>6</sub> H <sub>6</sub> → <b>51</b> | -2317.881276543867<br>-2317.873861267835<br>-2317.892750362789 |
| Structures <b>46</b> and <b>36</b> + C <sub>6</sub> H <sub>6</sub>                                         | -694.585563388456<br>-694.634596293241                         |
| Structures <b>47</b> and <b>37</b> + C <sub>6</sub> H <sub>6</sub>                                         | -2317.456175830623<br>-2317.526663268476                       |
| Structures <b>48</b> and <b>14</b> + C <sub>6</sub> H <sub>6</sub>                                         | -694.109977342010<br>-694.229681167878                         |
| Structure <b>40</b> and benzene loss product                                                               | -2317.431416862456<br>-2317.486444269560                       |
| Structure <b>41</b> and benzene loss product                                                               | -2317.839190083554<br>-2317.872897410588                       |

|                                                                    |                                          |
|--------------------------------------------------------------------|------------------------------------------|
| Structure <b>42</b> and<br>benzene loss product                    | -3940.745370905198<br>-3940.776013497543 |
| Dication <b>43</b>                                                 | -462.746568116341                        |
| Structure <b>44</b> and<br>benzene loss product                    | -2317.857435080340<br>-2317.875608211615 |
| Structure <b>45</b> and<br>benzene loss product                    | -3940.751618138240<br>-3940.783419548286 |
| Structure <b>16</b>                                                | -2024.991373566555                       |
| Structure <b>37</b>                                                | -2085.391989300991                       |
| Dication <b>5b</b>                                                 | -310.559202239391                        |
| Dication <b>57</b>                                                 | -310.537271755824                        |
| TS of rotation around the $\alpha,\beta$ -C-C<br>bond in <b>5b</b> | -310.557175095020                        |
